# Supplementary material for: Phytochemical Screening and Bioactive Properties of Juglans regia L. Pollen
Source: MDPI journal article supplement (doi:10.3390/antiox11102046), 2022-10-18
Supplement: s1 [file s1]

Supplementary material

# Phytochemical screening and bioactive properties of *Juglans regia* L. pollen

Natalia Żurek, Karolina Pycia, Agata Pawłowska and Ireneusz Tomasz Kapusta \*

Department Food Technology and Human Nutrition, Institute of Food Technology and Nutrition, University of Rzeszow, 4 Zelwerowicza St., 35-601 Rzeszow, Poland

\* Correspondence: [ikapusta@ur.edu.pl](mailto:ikapusta@ur.edu.pl); Tel.: +48-17-785-5238

## Content:

**Supplementary Table S1:** Correlation between TP, TF, compounds present in the highest concentration in *J. regia* pollen extract and antioxidant activity.

**Supplementary Table S2:** Correlation between TP, TF, compounds present in the highest concentration in *J. regia* pollen extract and antiproliferation activity.

UPLC chromatogram of *J. regia* pollen extracts and UV-Vis and MS spectra of identified compounds.

**Table S1.** Correlation between TP, TF, compounds present in the highest concentration (quercetin 3-O-sophoroside, kaempferol 3-O-sophoroside, dimethoxyflavone-7-O-beta-D-glucoside) in *J. regia* pollen extract and antioxidant activity determined by ABTS, CUPRAC, ChA, O<sub>2</sub><sup>•</sup>, and OH<sup>•</sup> methods.

|                                  | TP       | TF     | Quercetin<br>3-O-<br>sophoroside | Kaempferol<br>3-O-<br>sophoroside | dimethoxyflavone-<br>7-O-beta-D-gluco-<br>side |
|----------------------------------|----------|--------|----------------------------------|-----------------------------------|------------------------------------------------|
| <b>ABTS</b>                      | 0.992*   | 0.681  | 0.998*                           | 0.999**                           | 0.873                                          |
| <b>CUPRAC</b>                    | 0.634    | 0.998* | -0.476                           | -0.537                            | -0.486                                         |
| <b>ChA</b>                       | -0.999** | 0.931  | -0.987                           | -0.988                            | -0.704                                         |
| <b>O<sub>2</sub><sup>•</sup></b> | 0.513    | 0.507  | 0.666                            | 0.622                             | 0.596                                          |
| <b>OH<sup>•</sup></b>            | -0.683   | -0.687 | -0.533                           | -0.508                            | -0.519                                         |

(+) positive correlation, (-) negative correlation, \*significant differences at  $p < 0.05$ , \*\* significant differences at  $p < 0.01$ .

**Table S2.** Correlation between TP, TF, compounds present in the highest concentration (quercetin 3-O-sophoroside, kaempferol 3-O-sophoroside, dimethoxyflavone-7-O-beta-D-glucoside) in *J. regia* pollen extract and antiproliferation activity against MCF-7, DLD-1, Caco-2, U87MG, U251MG, SK-Mel-29, and CCD841 CoN cell lines.

|                   | TP     | TF      | Quercetin<br>3-O-<br>sophoroside | Kaempferol<br>3-O-<br>sophoroside | dimethoxyflavone-<br>7-O-beta-D-gluco-<br>side |
|-------------------|--------|---------|----------------------------------|-----------------------------------|------------------------------------------------|
| <b>MCF-7</b>      | -0.971 | -0.977* | -0.999*                          | -0.873                            | -0.884                                         |
| <b>DLD-1</b>      | 0.494  | -0.488  | -0.644                           | -0.610                            | -0.725                                         |
| <b>Caco-2</b>     | -0.676 | -0.981* | -0.803                           | -0.711                            | -0.632                                         |
| <b>U87MG</b>      | -0.516 | -0.590  | -0.668                           | -0.769                            | -0.703                                         |
| <b>U251MG</b>     | 0.098  | 0.305   | -0.090                           | -0.295                            | -0.478                                         |
| <b>SK-Mel-29</b>  | -0.358 | -0.451  | -0.528                           | -0.678                            | -0.749                                         |
| <b>CCD841 CoN</b> | -0.189 | -0.195  | -0.371                           | -0.209                            | -0.331                                         |

(+) positive correlation, (-) negative correlation, \*significant differences at  $p < 0.05$ , \*\* significant differences at  $p < 0.01$ .
