# Supplementary material for: Phytochemical Screening and Bioactive Properties of Juglans regia L. Pollen
Source: Antioxidants (Basel). 2022 Oct 18;11(10):2046. doi: 10.3390/antiox11102046 (PMC9598064; doi:10.3390/antiox11102046)
Supplement: Supplementary file 1 [file antioxidants-11-02046-s001.zip]

Archive with 27 entries (27 files):
- S1-Chromatogram.pdf
- S10-Compound_11_12_MS_Spectrum.pdf
- S11-Compound_13_MS_Spectra.pdf
- S12-Compound_14_MS_Spectrum.pdf
- S13-Compound_15_MS_Spectrum.pdf
- S14-Compound_15_UV_Spectrum.pdf
- S15-Compound_16_18_20_MS_Spectrum.pdf
- S16-Compound_17_MS_Spectrum.pdf
- S17-Compound_19_MS_Spectrum.pdf
- S18-Compound_21_MS_Spectrum.pdf
- S19-Compound_22_MS_Spectrum.pdf
- S2-Componds 3_4_5_6_UV_Spectra.pdf
- S20-Compound_23_MS_Spectrum.pdf
- S21-Compound_24_MS_Spectrum.pdf
- S22-Compounds_1_7_8_9_14_16_18_20_21_UV_Spectra.pdf
- S23-Compounds_7_8_MS_Spectrum.pdf
- S24-Compounds_10_13_17_UV_Spectra.pdf
- S25-Compounds_11_12_19_22_24_UV_Spectra.pdf
- S26-Fragmentation pattern of compound 8.pdf
- S3-Compound_2_23_UV_Spectra.pdf
- S4-Compound_3_MS_Spectrum.pdf
- S5-Compound_4_MS_Spectra.pdf
- S6-Compound_5_MS_Spectra.pdf
- S7-Compound_6_MS_Spectra.pdf
- S8-Compound_9_MS_Spectrum.pdf
- S9-Compound_10_MS_Spectrum.pdf
- Supplementary Tables.pdf
