# Supplementary material for: Phytochemical Screening and Bioactive Properties of Juglans regia L. Pollen
Source: Antioxidants (Basel). 2022 Oct 18;11(10):2046. doi: 10.3390/antiox11102046 (PMC9598064; doi:10.3390/antiox11102046)

orzech\_pylek\_2

2: Diode Array  
Range: 5.482e+2

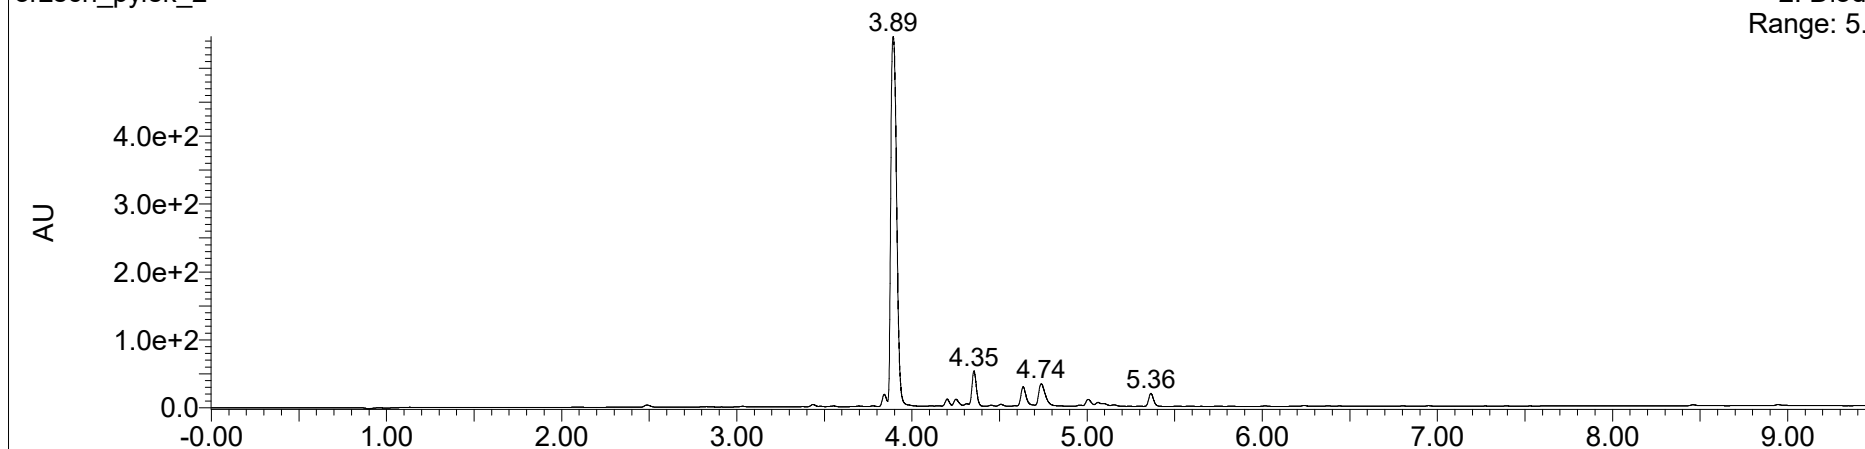

orzech\_pylek\_2

2: Diode Array  
Range: 5.482e+2

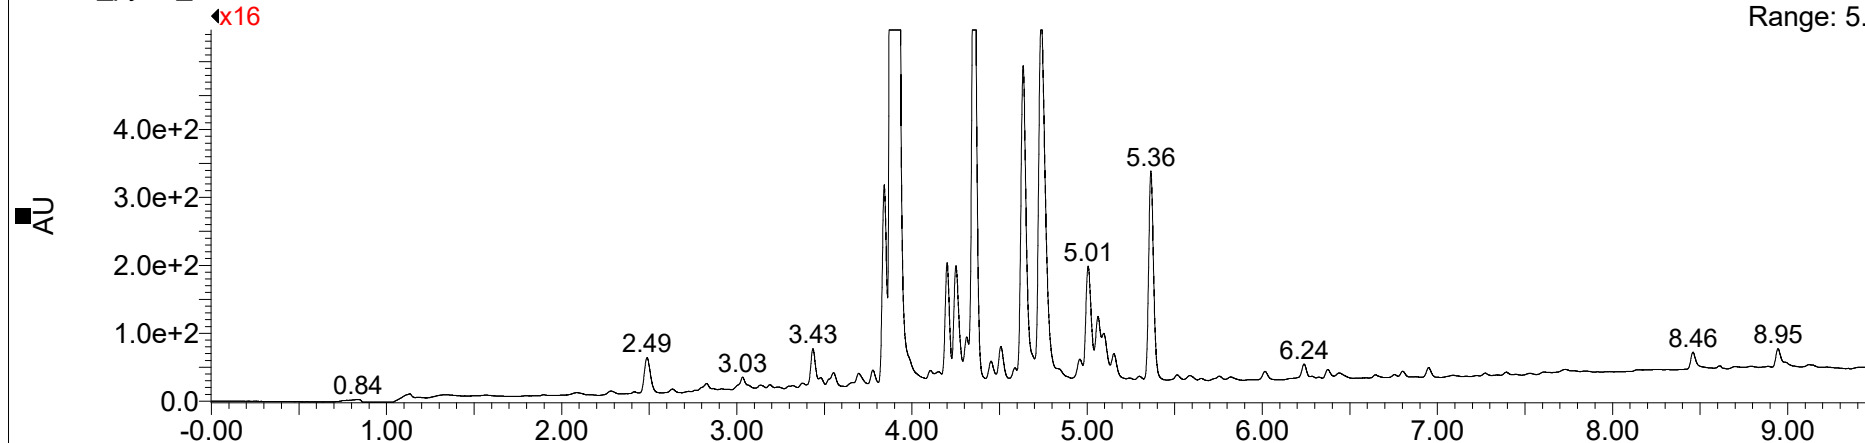

orzech\_pylek\_2 Sm (SG, 2x1)

1: Scan ES-  
BPI  
3.70e6

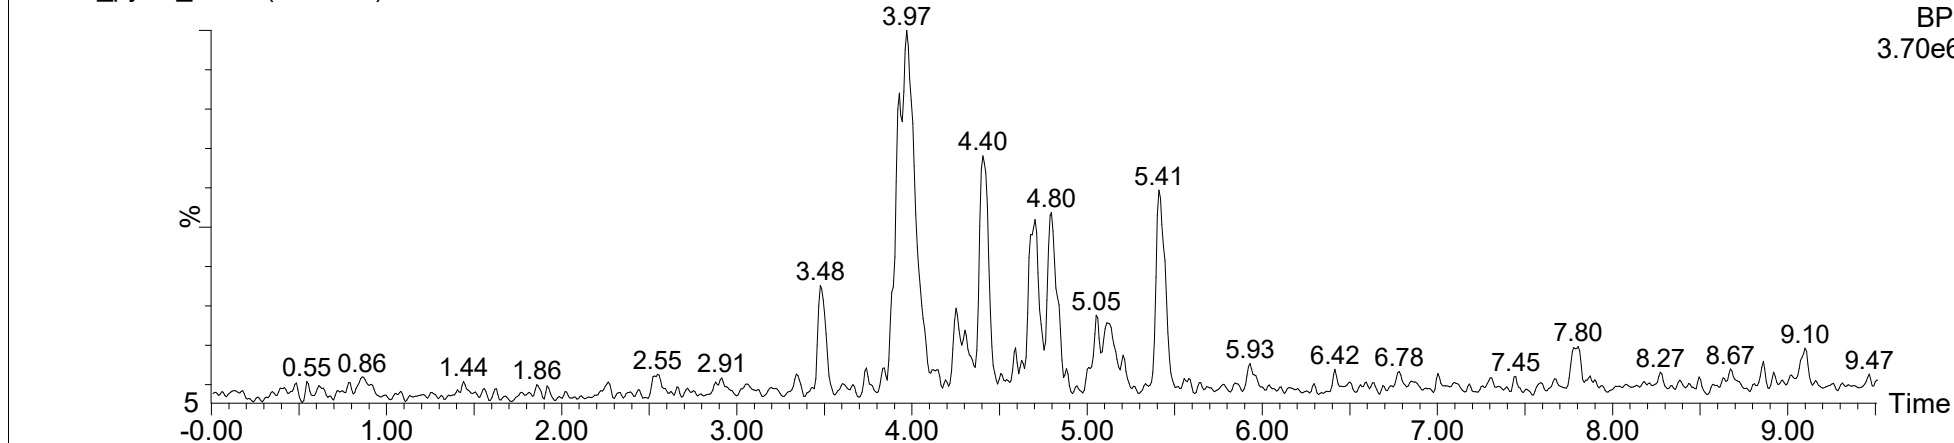

Supplement: Supplementary file 1 [file antioxidants-11-02046-s001.zip › S1-Chromatogram.pdf]
