# Supplementary figures and images for: Phytochemical Screening and Bioactive Properties of Juglans regia L. Pollen
Source: MDPI journal article supplement (doi:10.3390/antiox11102046), 2022-10-18

orzech\_pylek\_2 5230 (4.358)

2: Diode Array  
6.009e-1

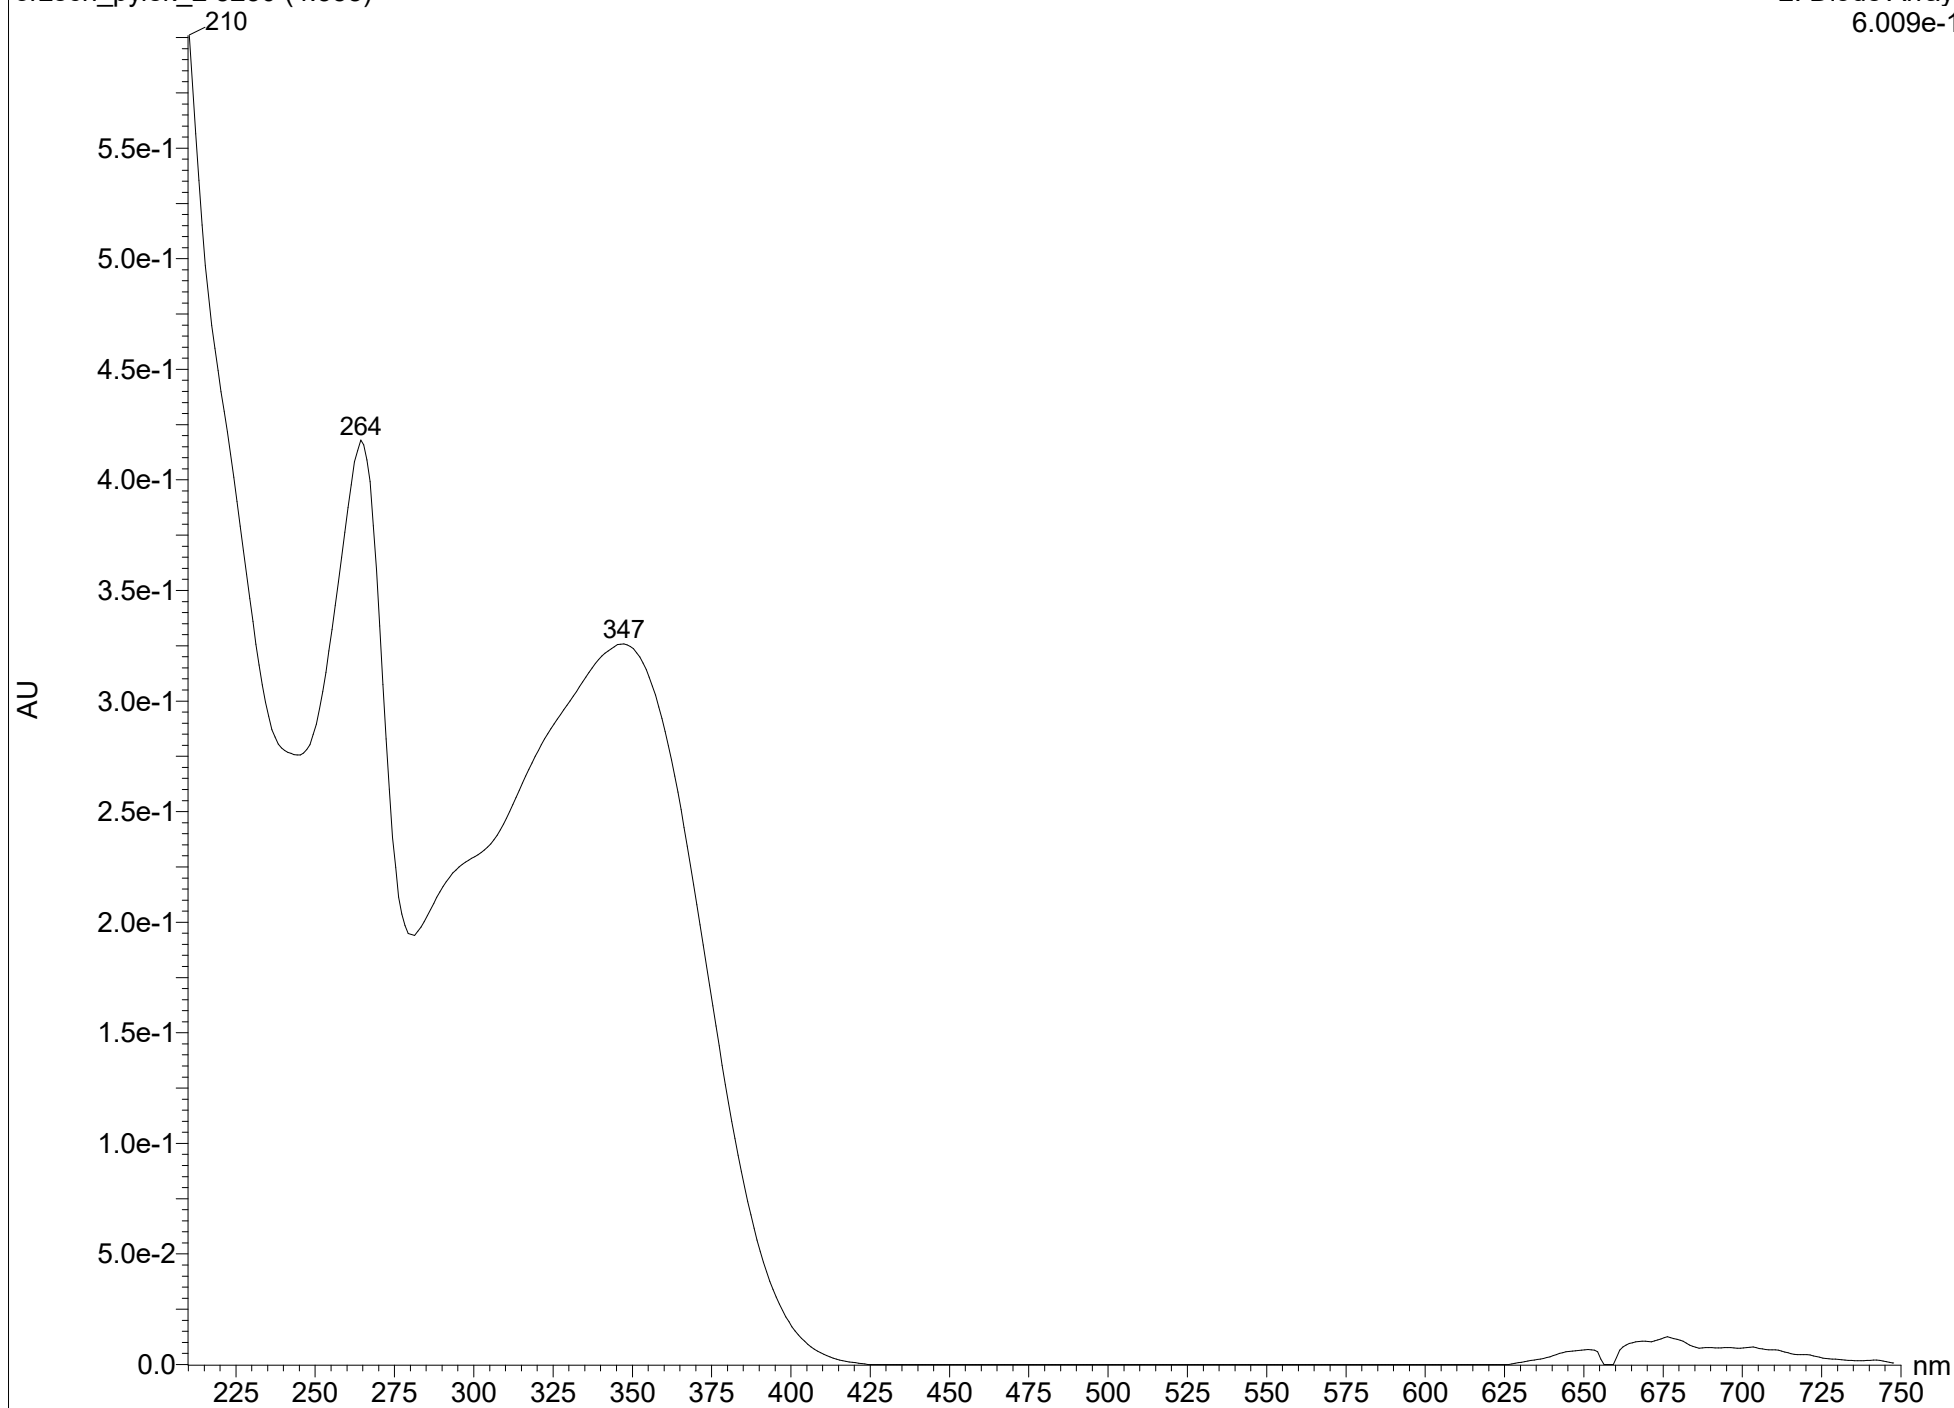

Supplement: s1 [file s1]

orzech\_pylek\_2 450 (3.834) Cm (445:453)

1: Scan ES-  
2.05e5

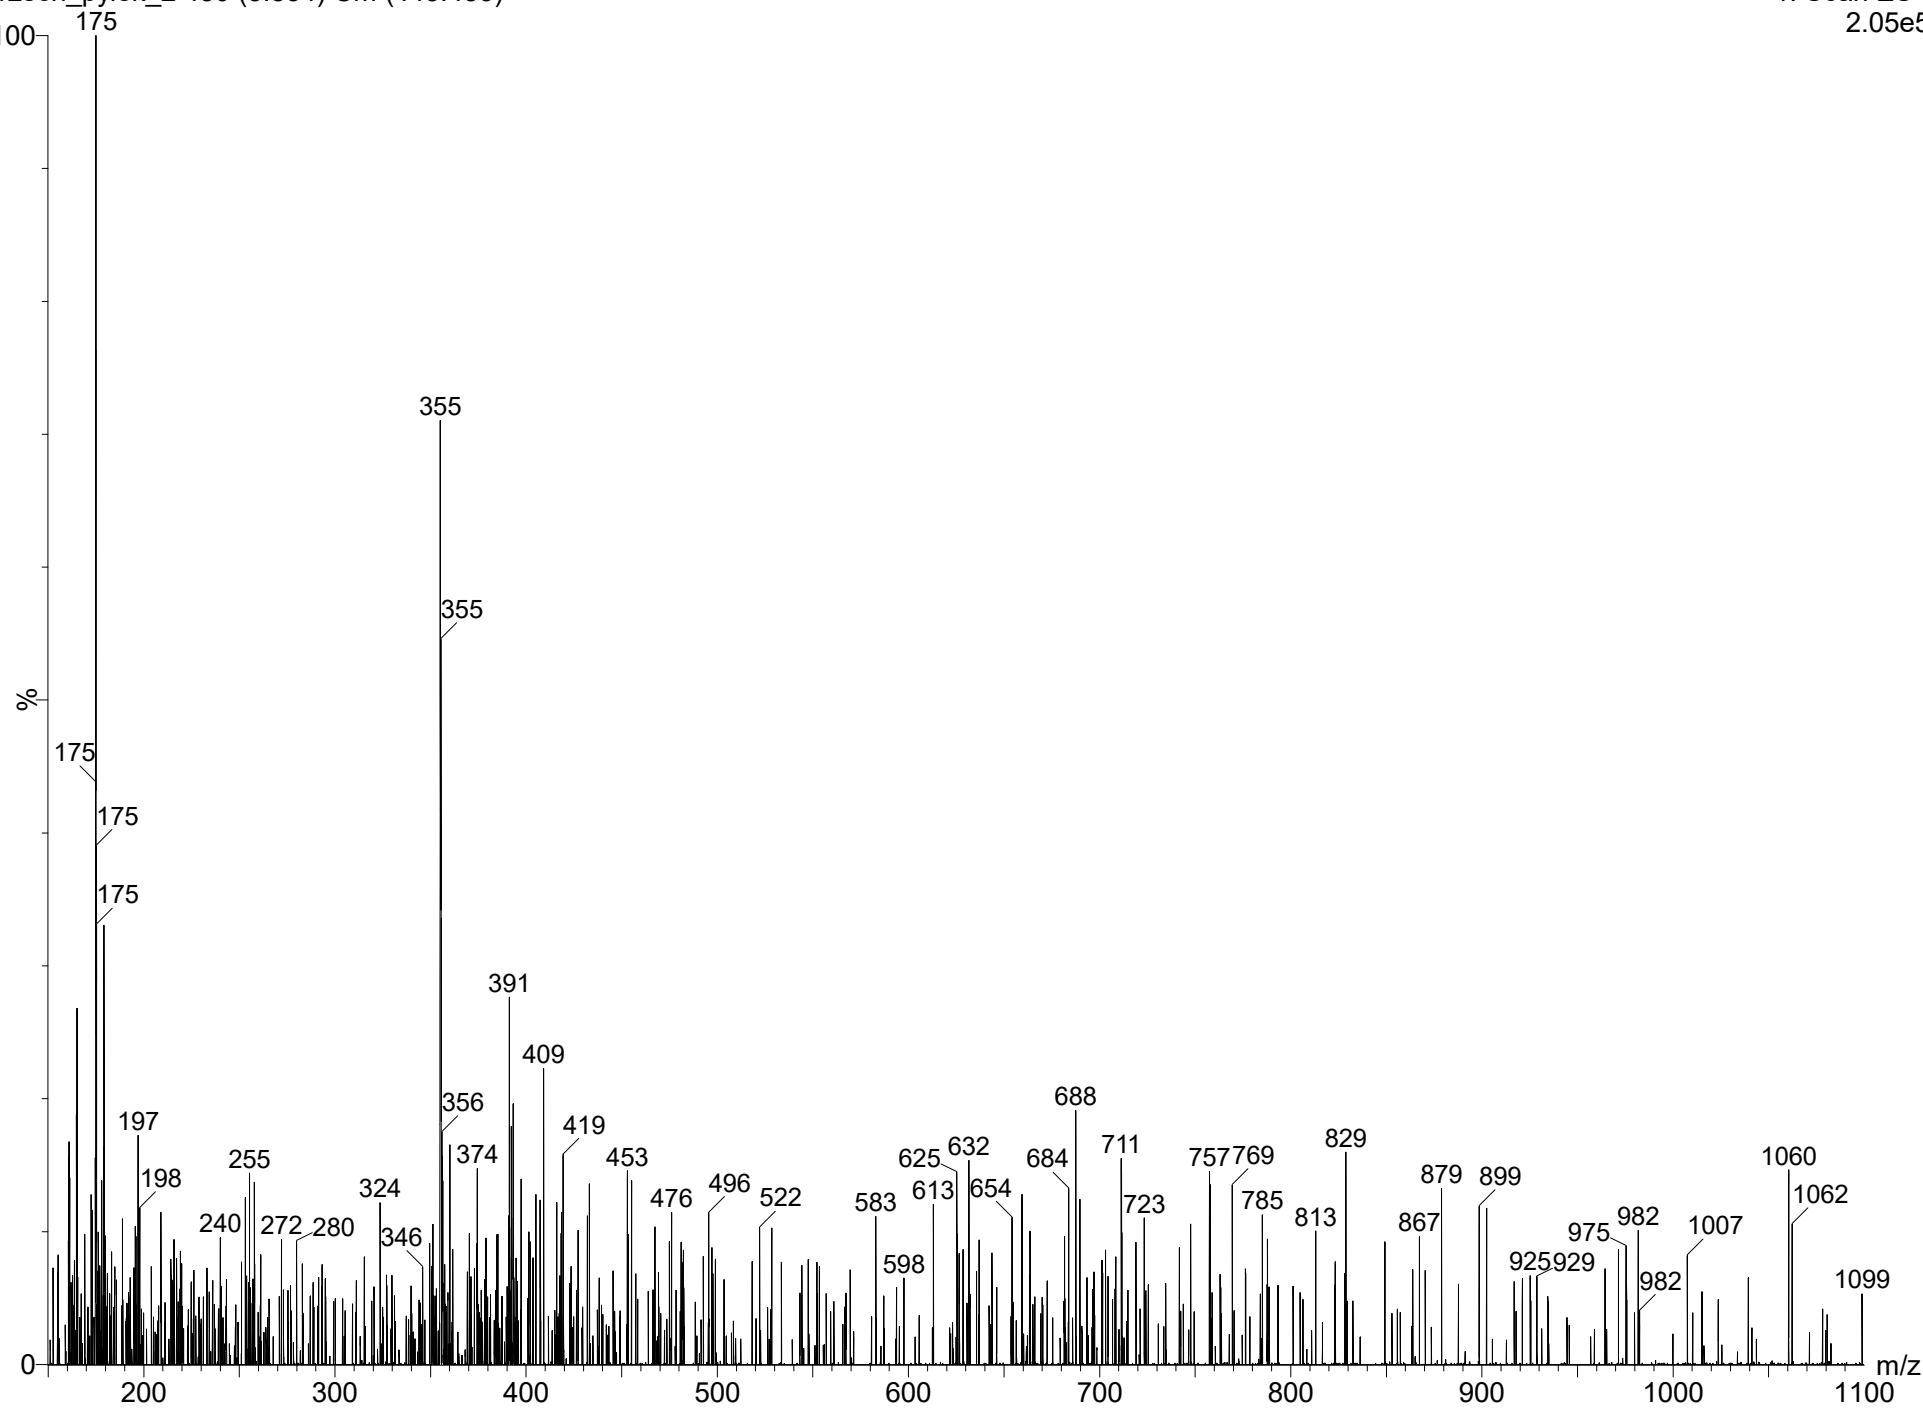

Supplement: s1 [file s1]

OK\_1 5693 (4.743)

2: Diode Array  
1.837

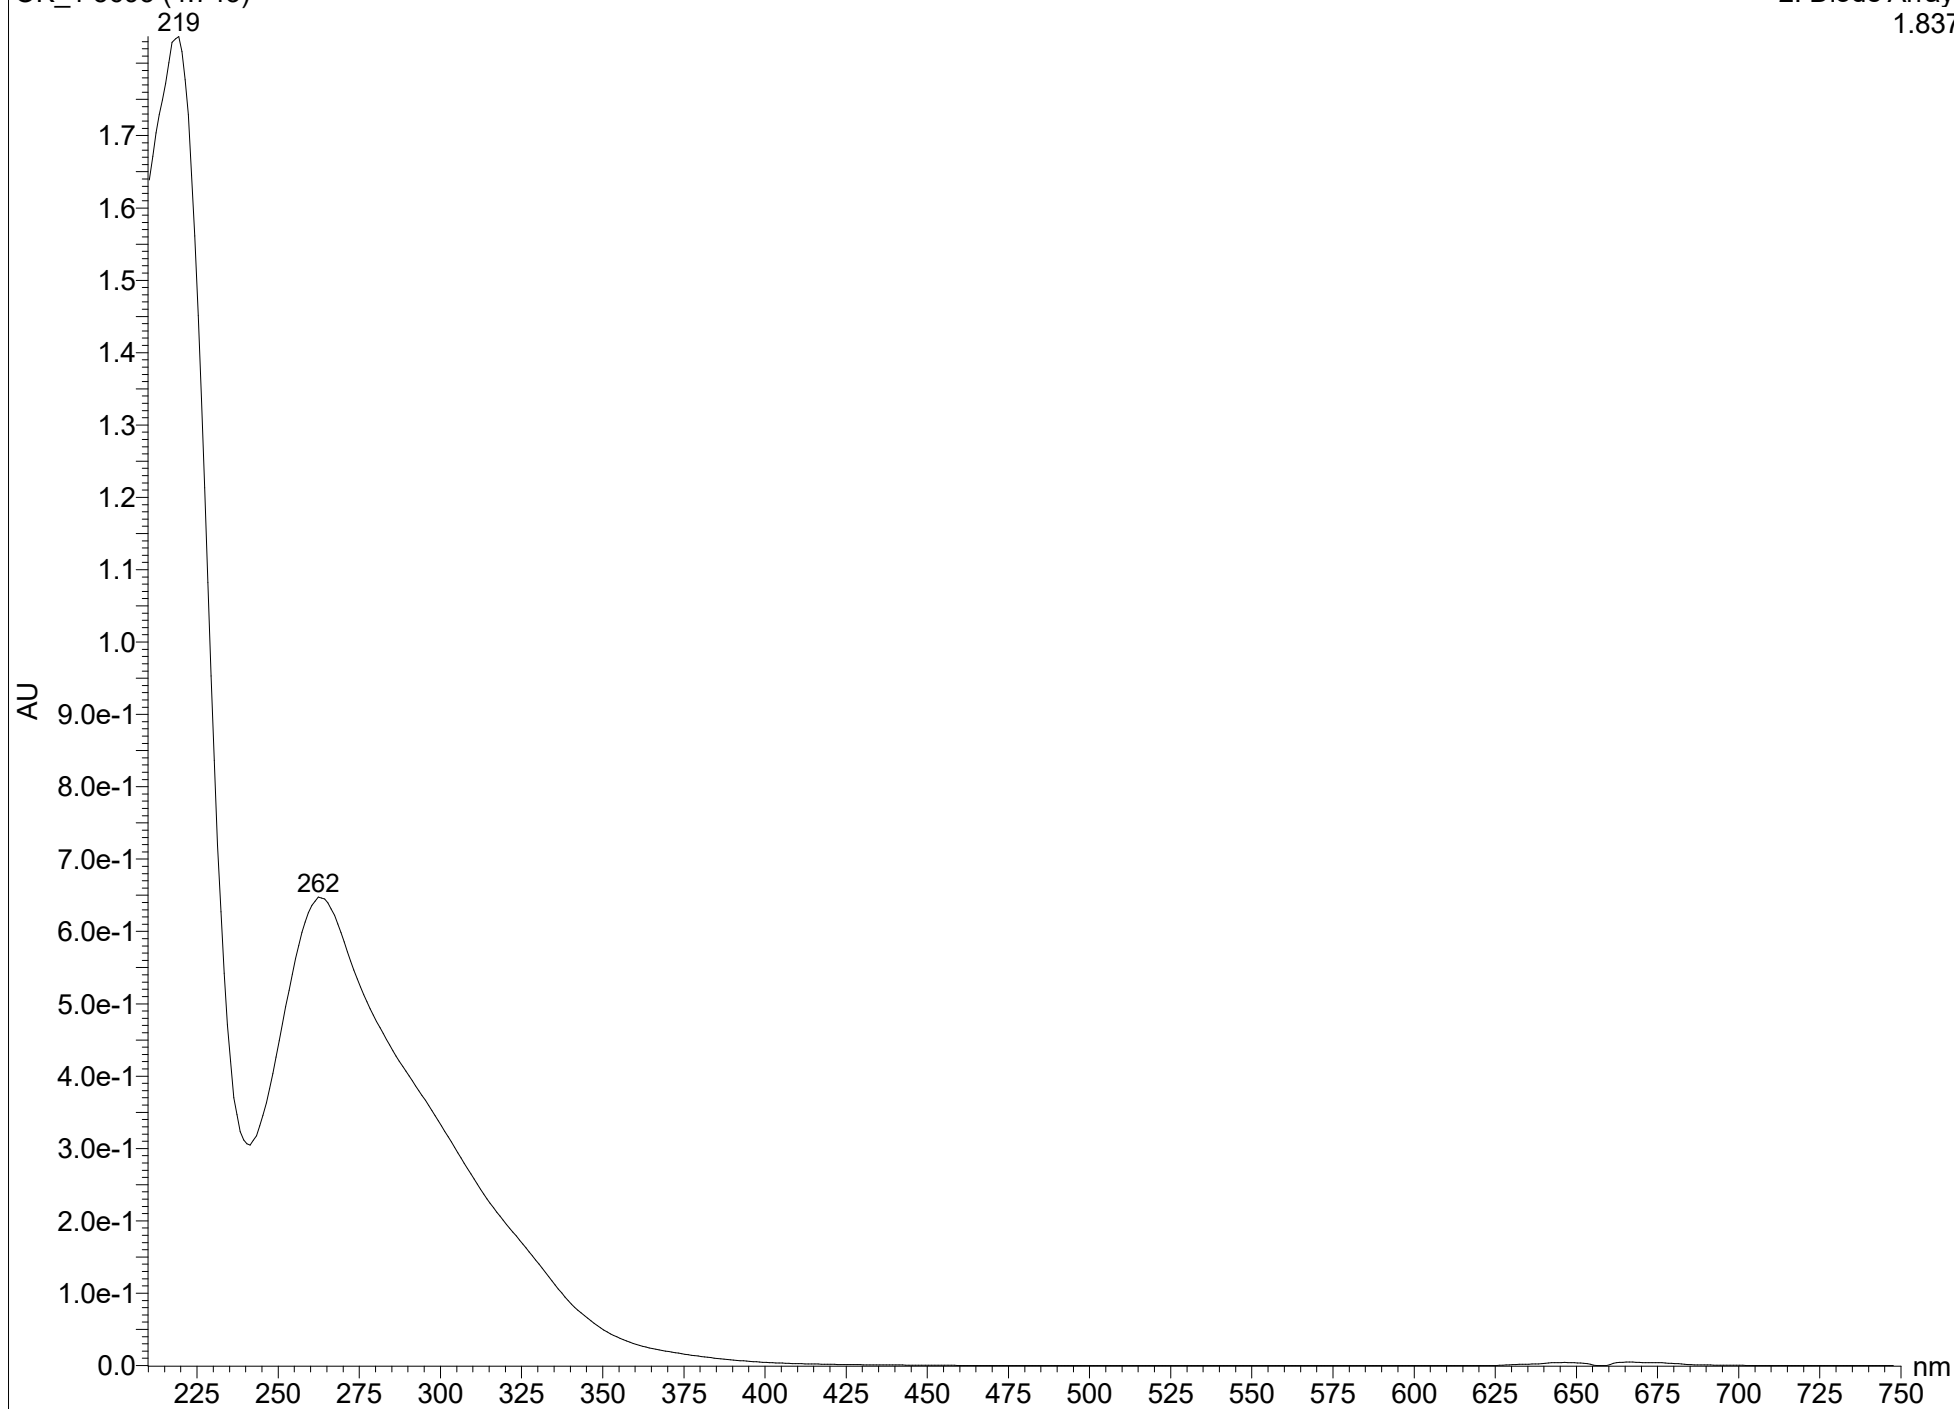

Supplement: s1 [file s1]

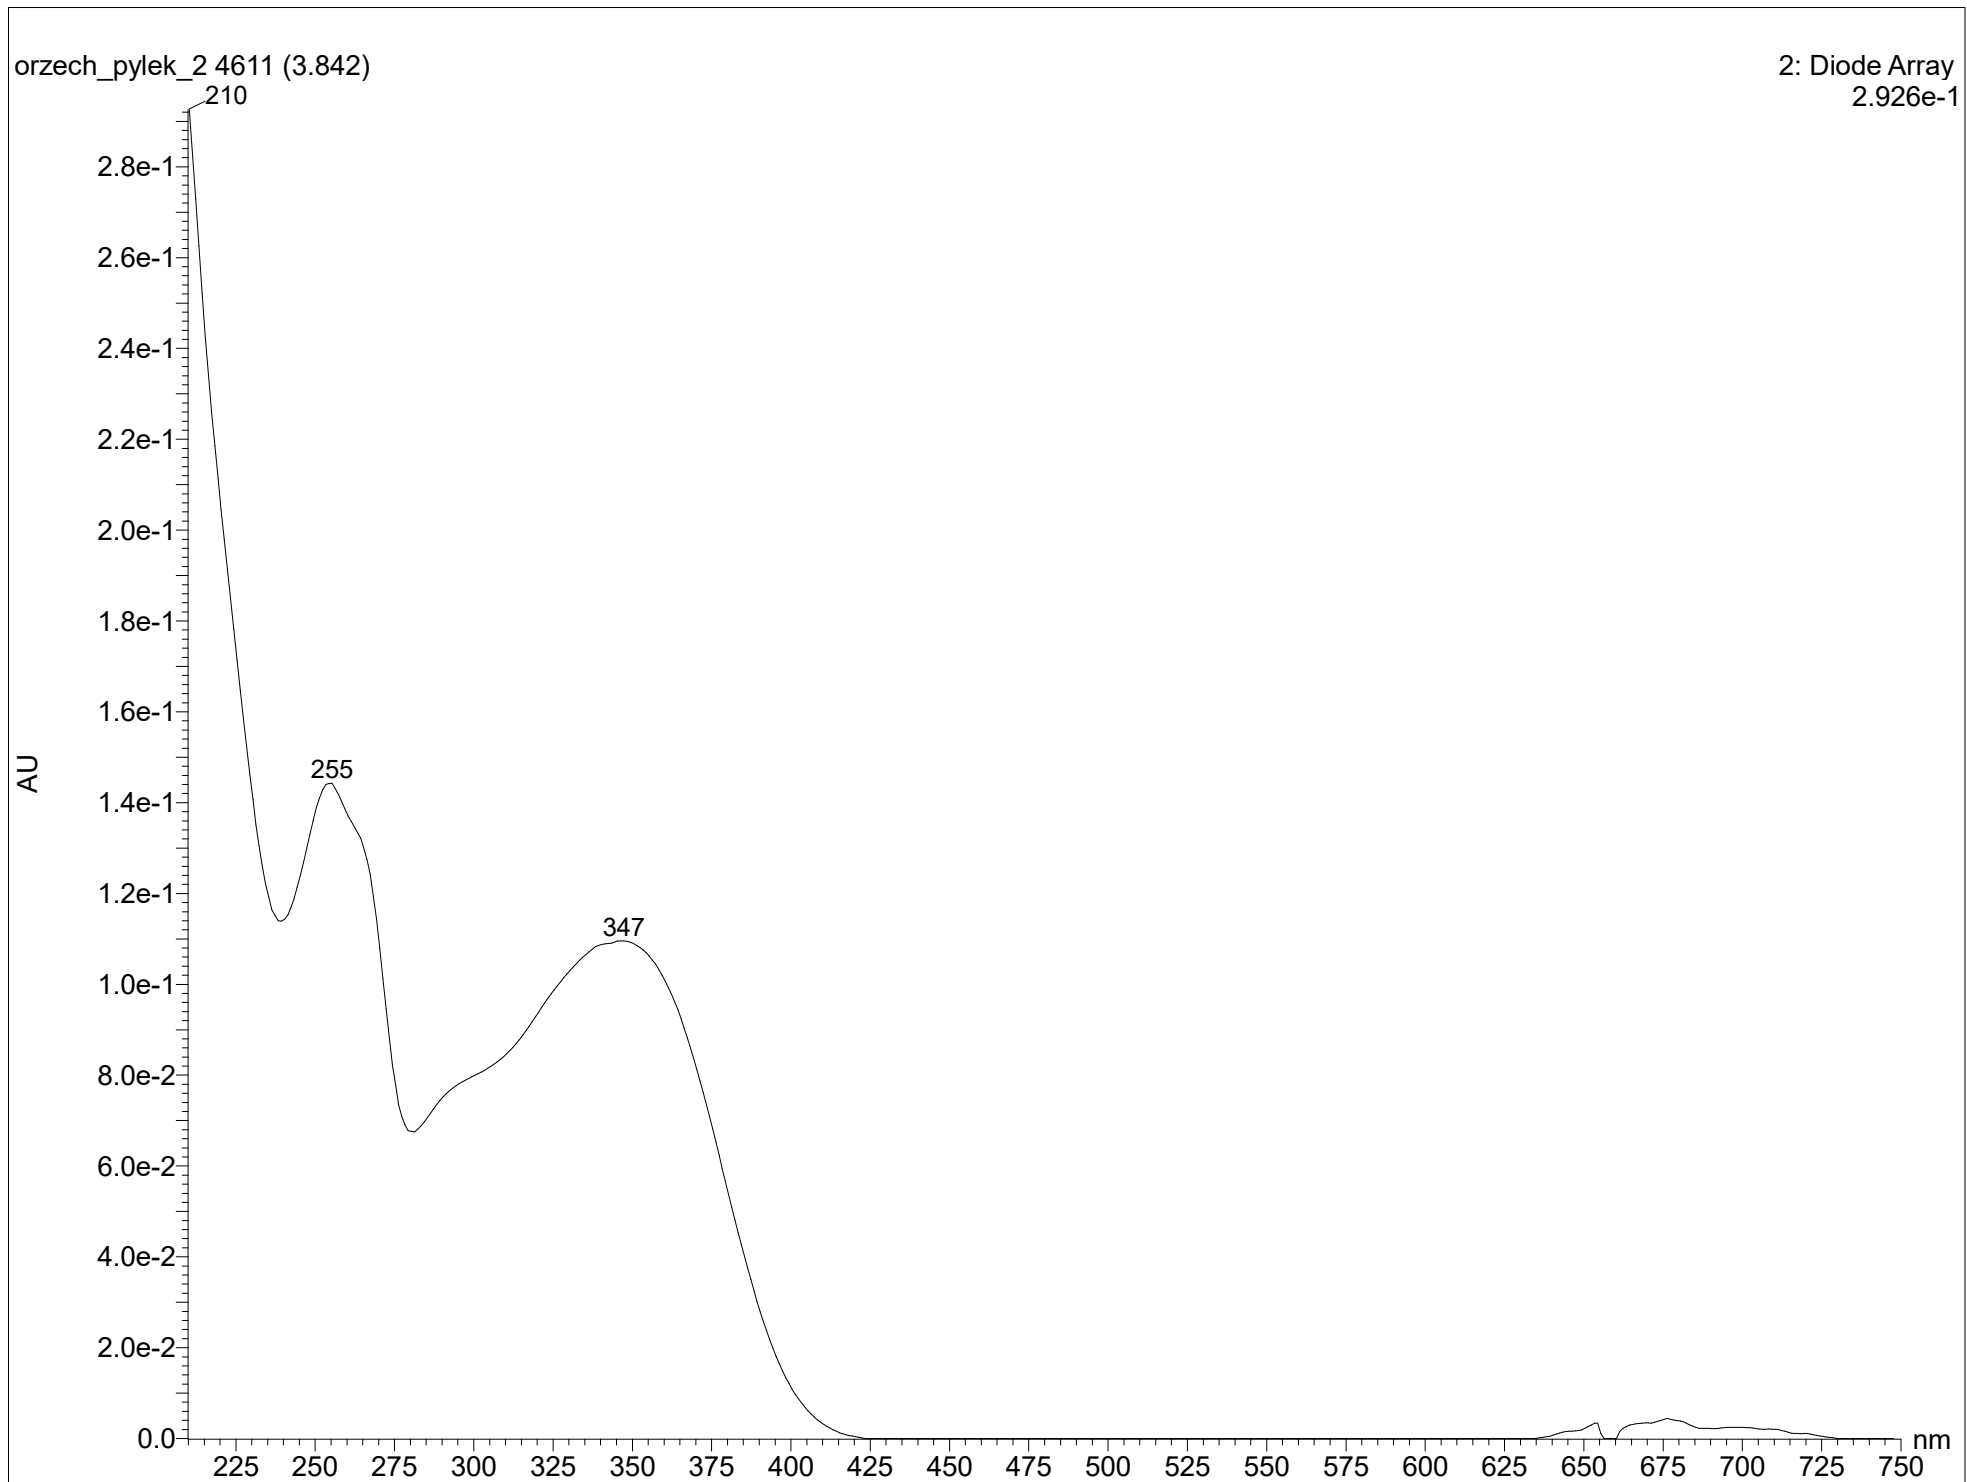

Supplement: s1 [file s1]

orzech\_pylek\_2 423 (3.604) Cm (418:429)

1: Scan ES-  
9.77e4

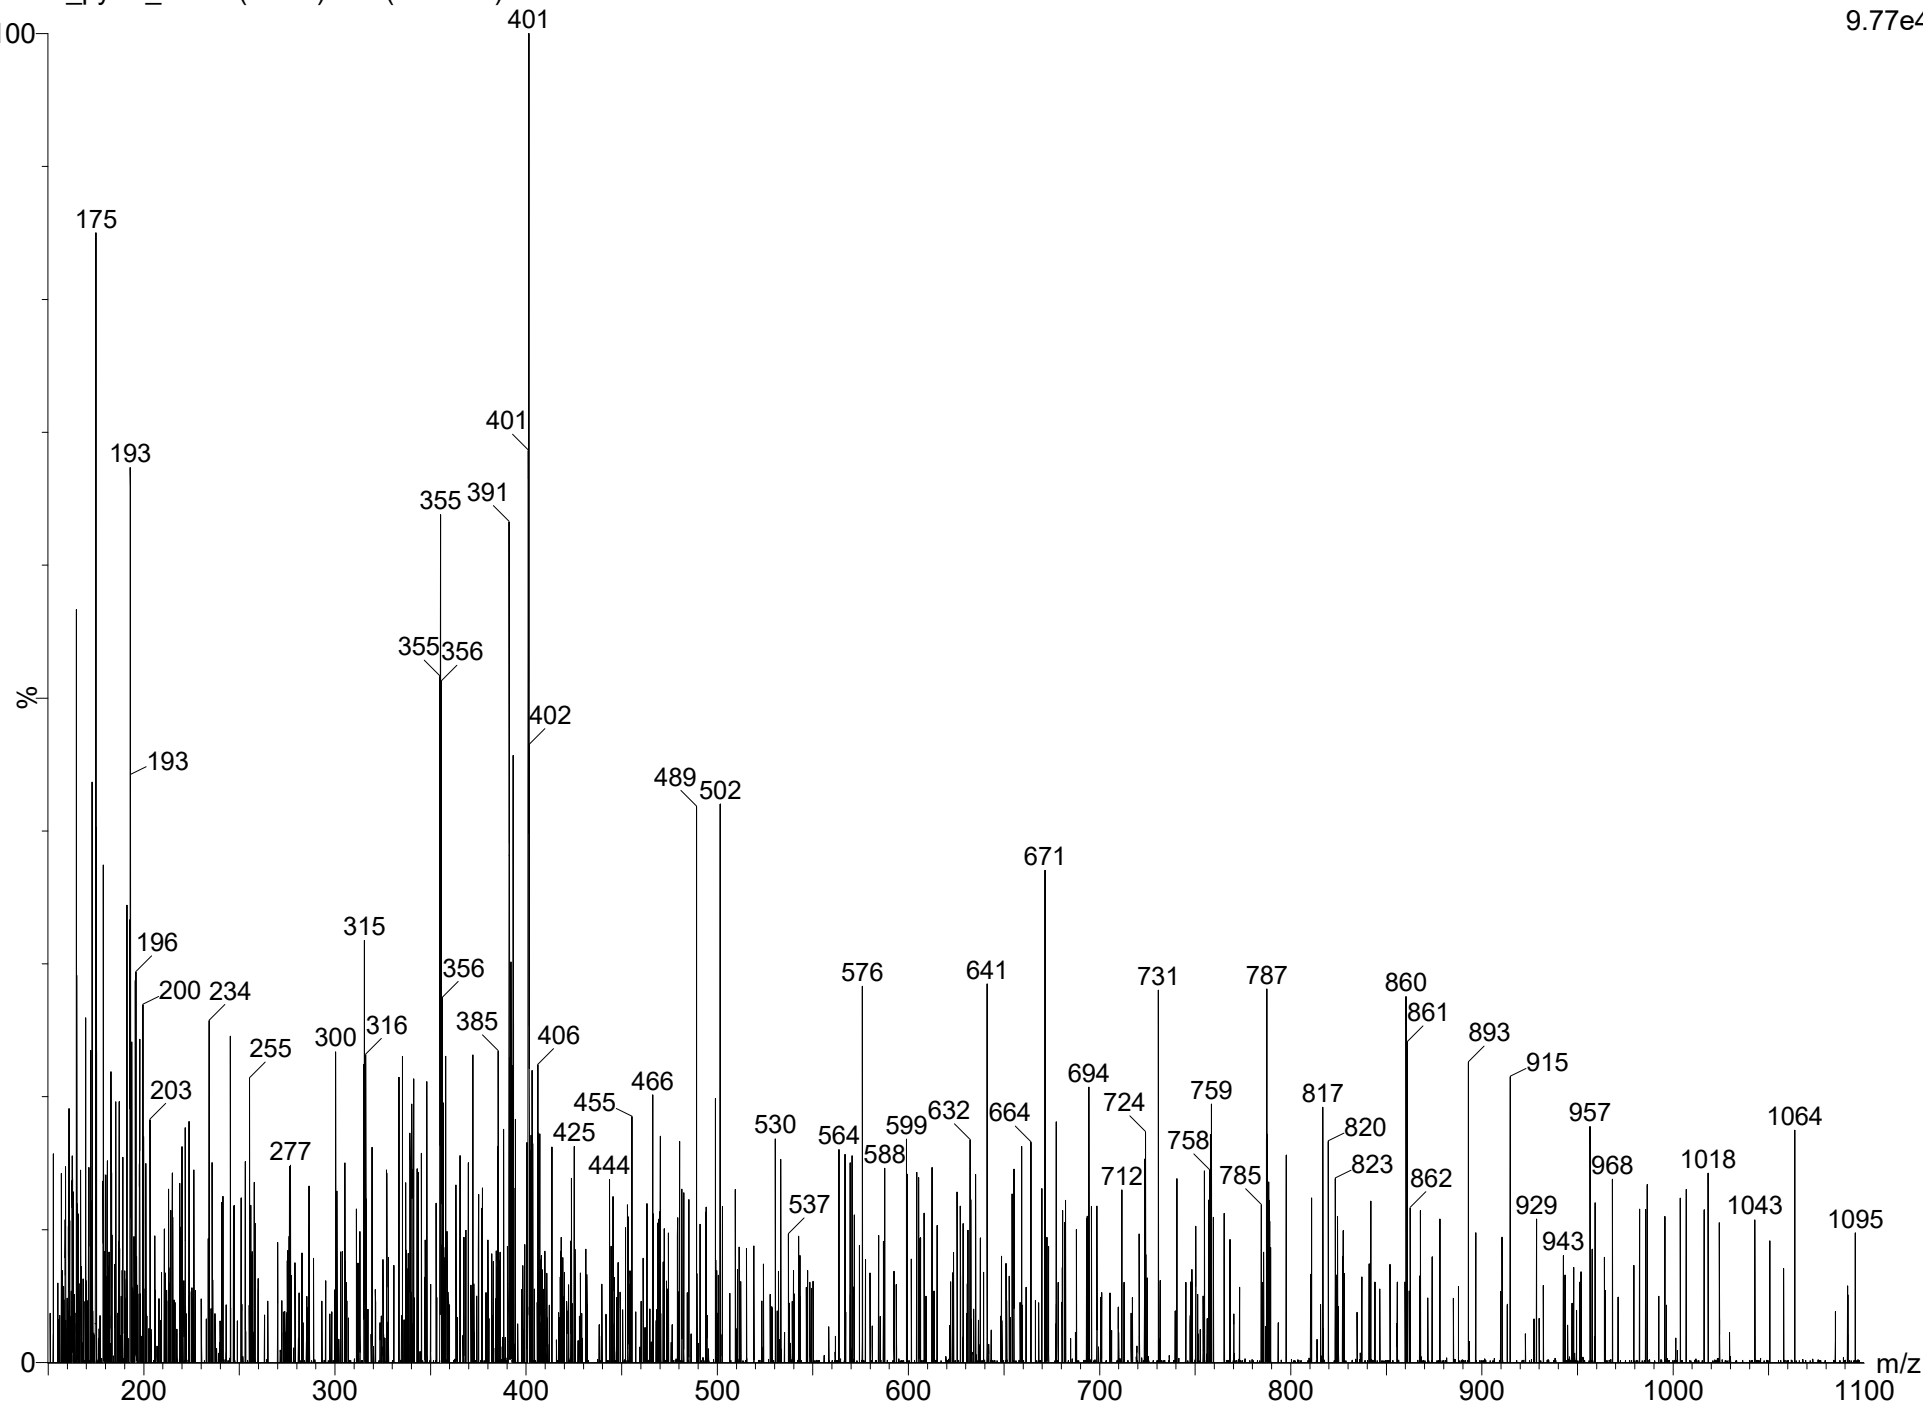

Supplement: s1 [file s1]

orzech\_pylek\_2 549 (4.677) Cm (545:554)

1: Scan ES-  
1.11e6

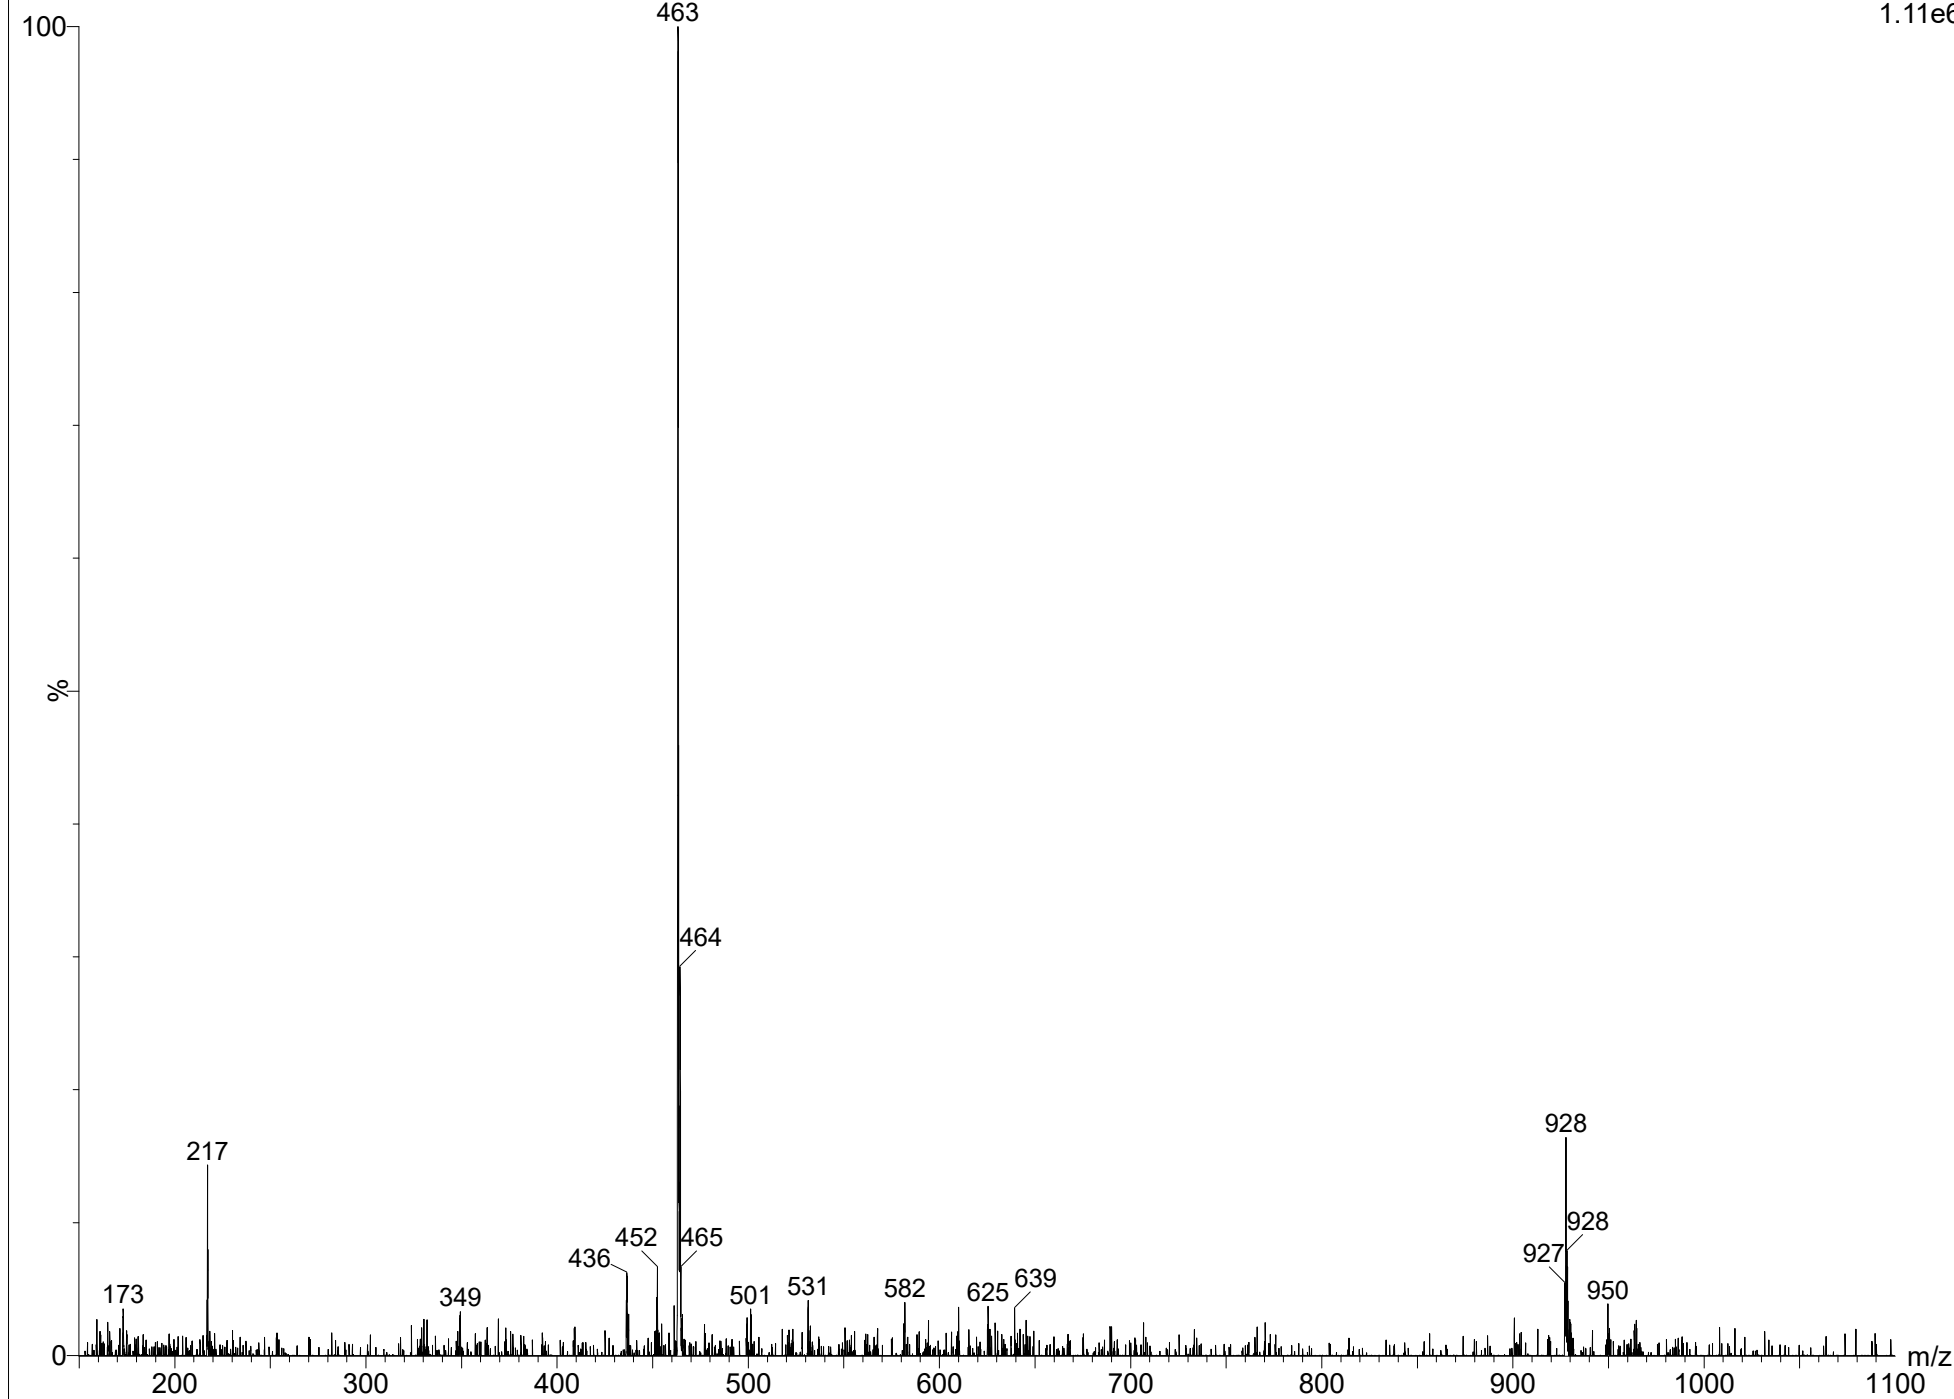

Supplement: s1 [file s1]

orzech\_pylek\_2a 3725 (3.103)

2: Diode Array  
2.244e-1

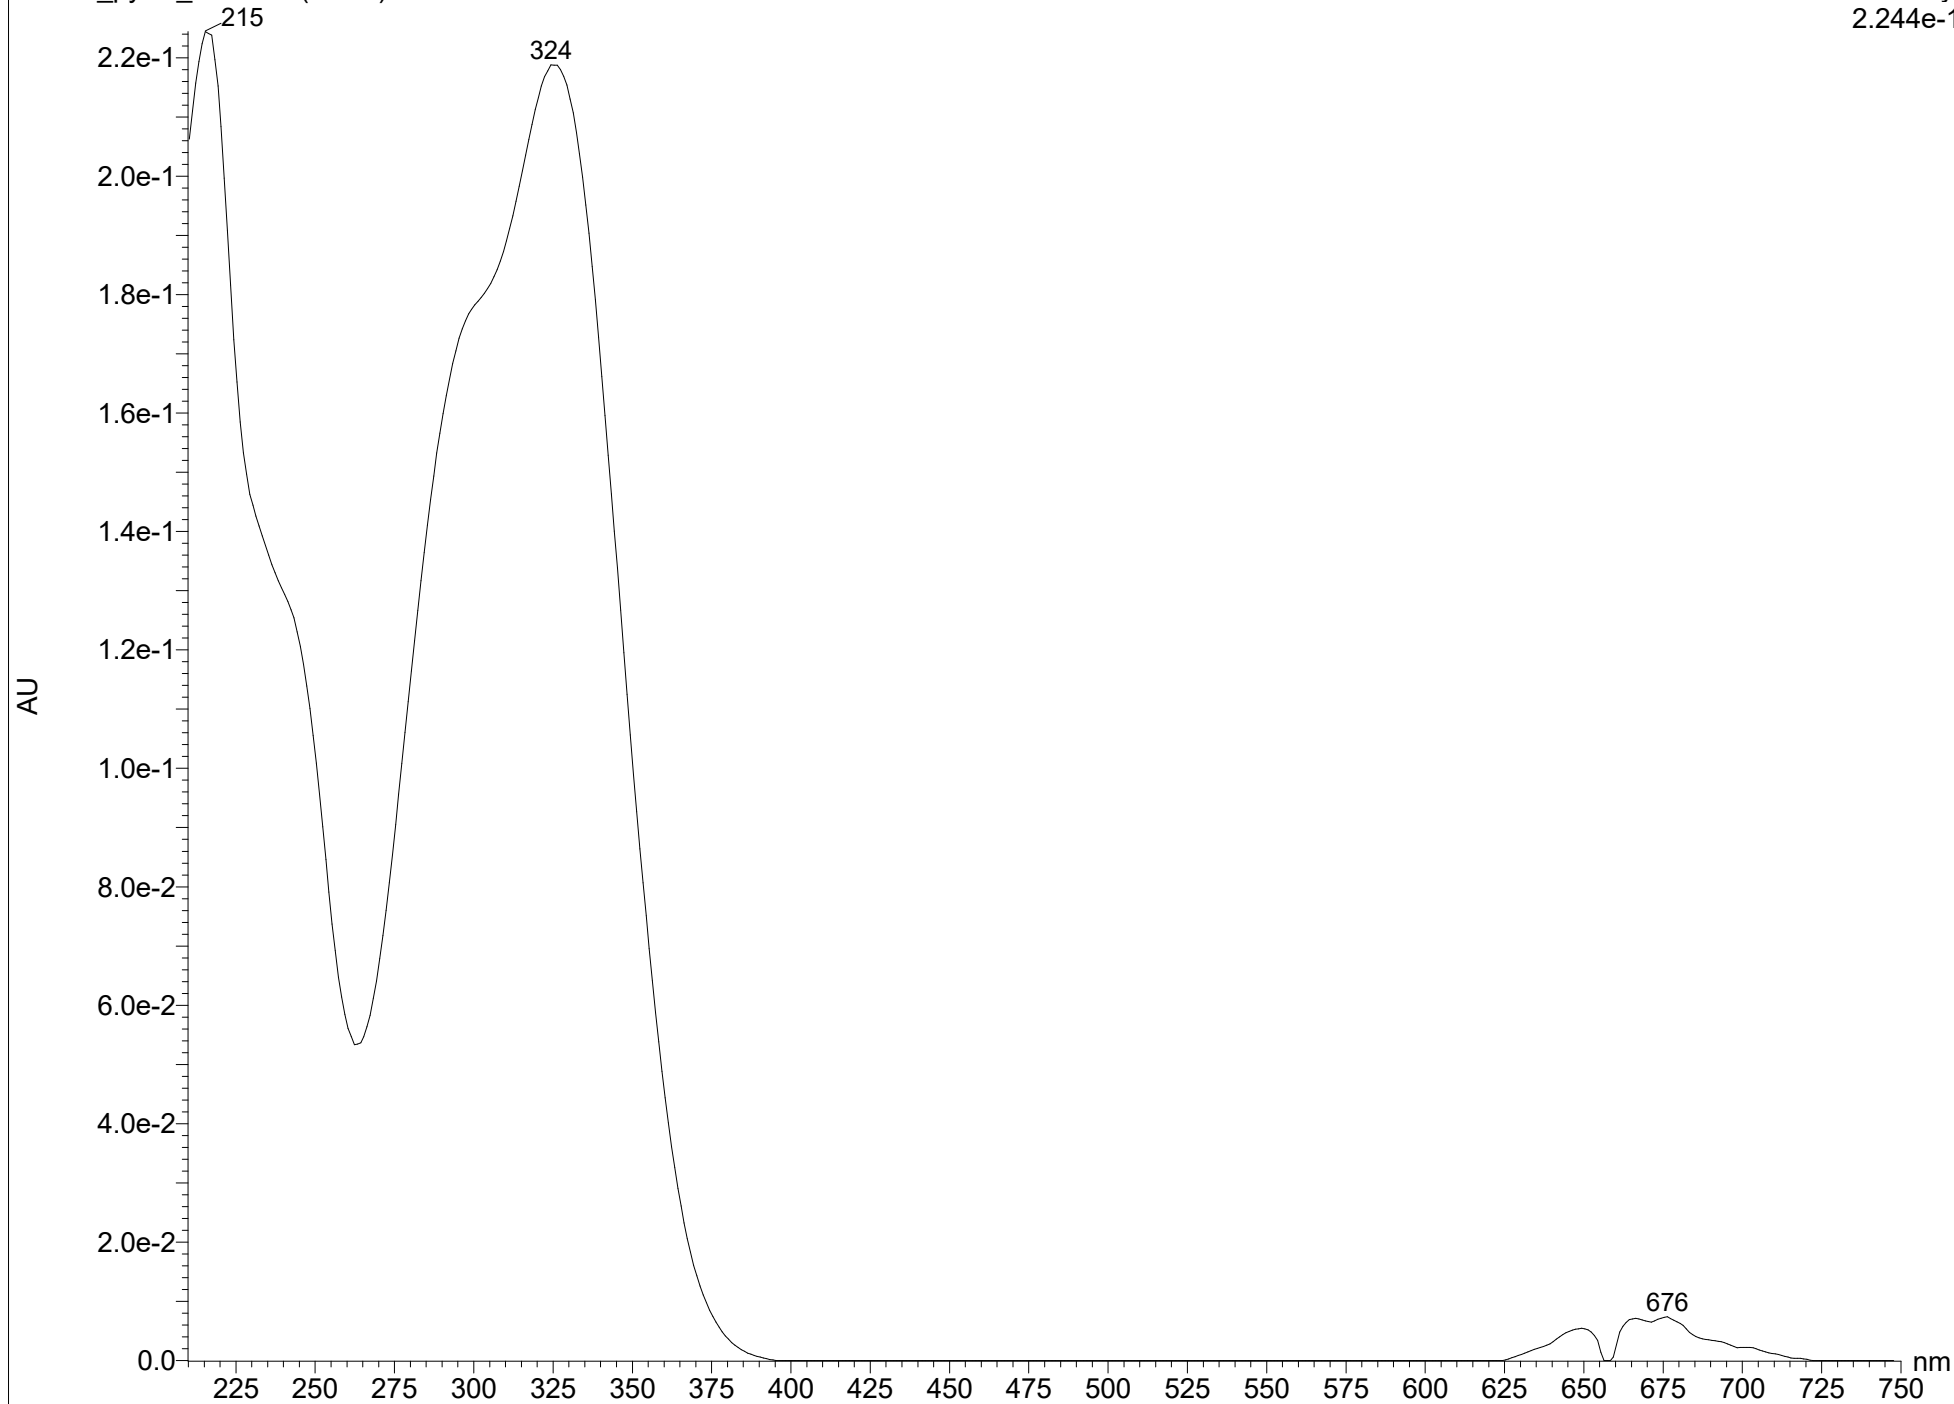

Supplement: s1 [file s1]

orzech\_pylek\_2 590 (5.027) Cm (583:590)

1: Scan ES-  
2.02e5

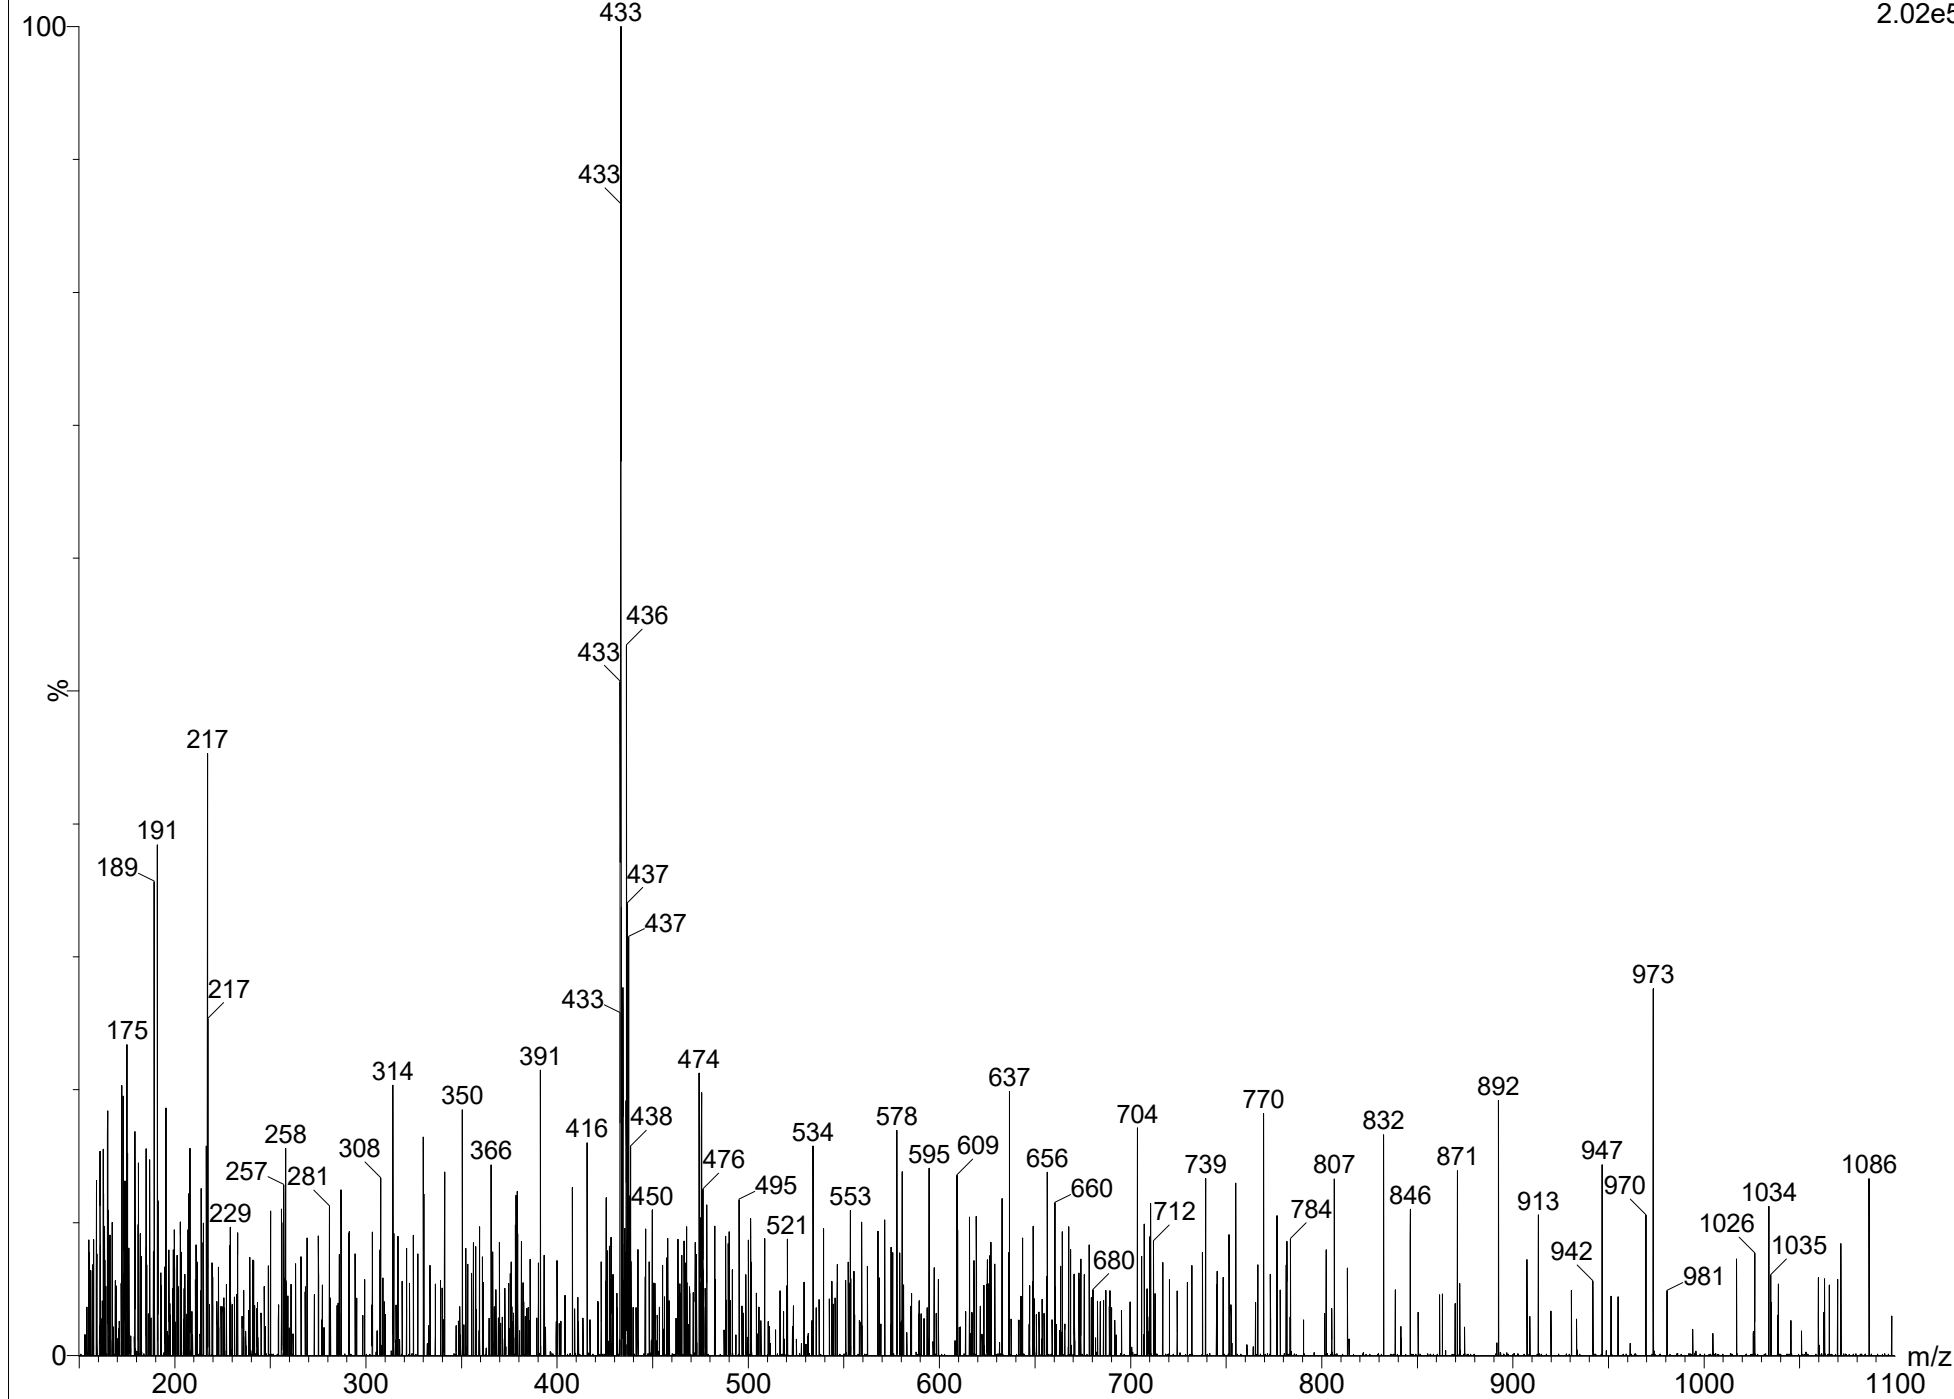

Supplement: s1 [file s1]

orzech\_pylek\_2 505 (4.302) Cm (502:509)

1: Scan ES-  
4.82e5

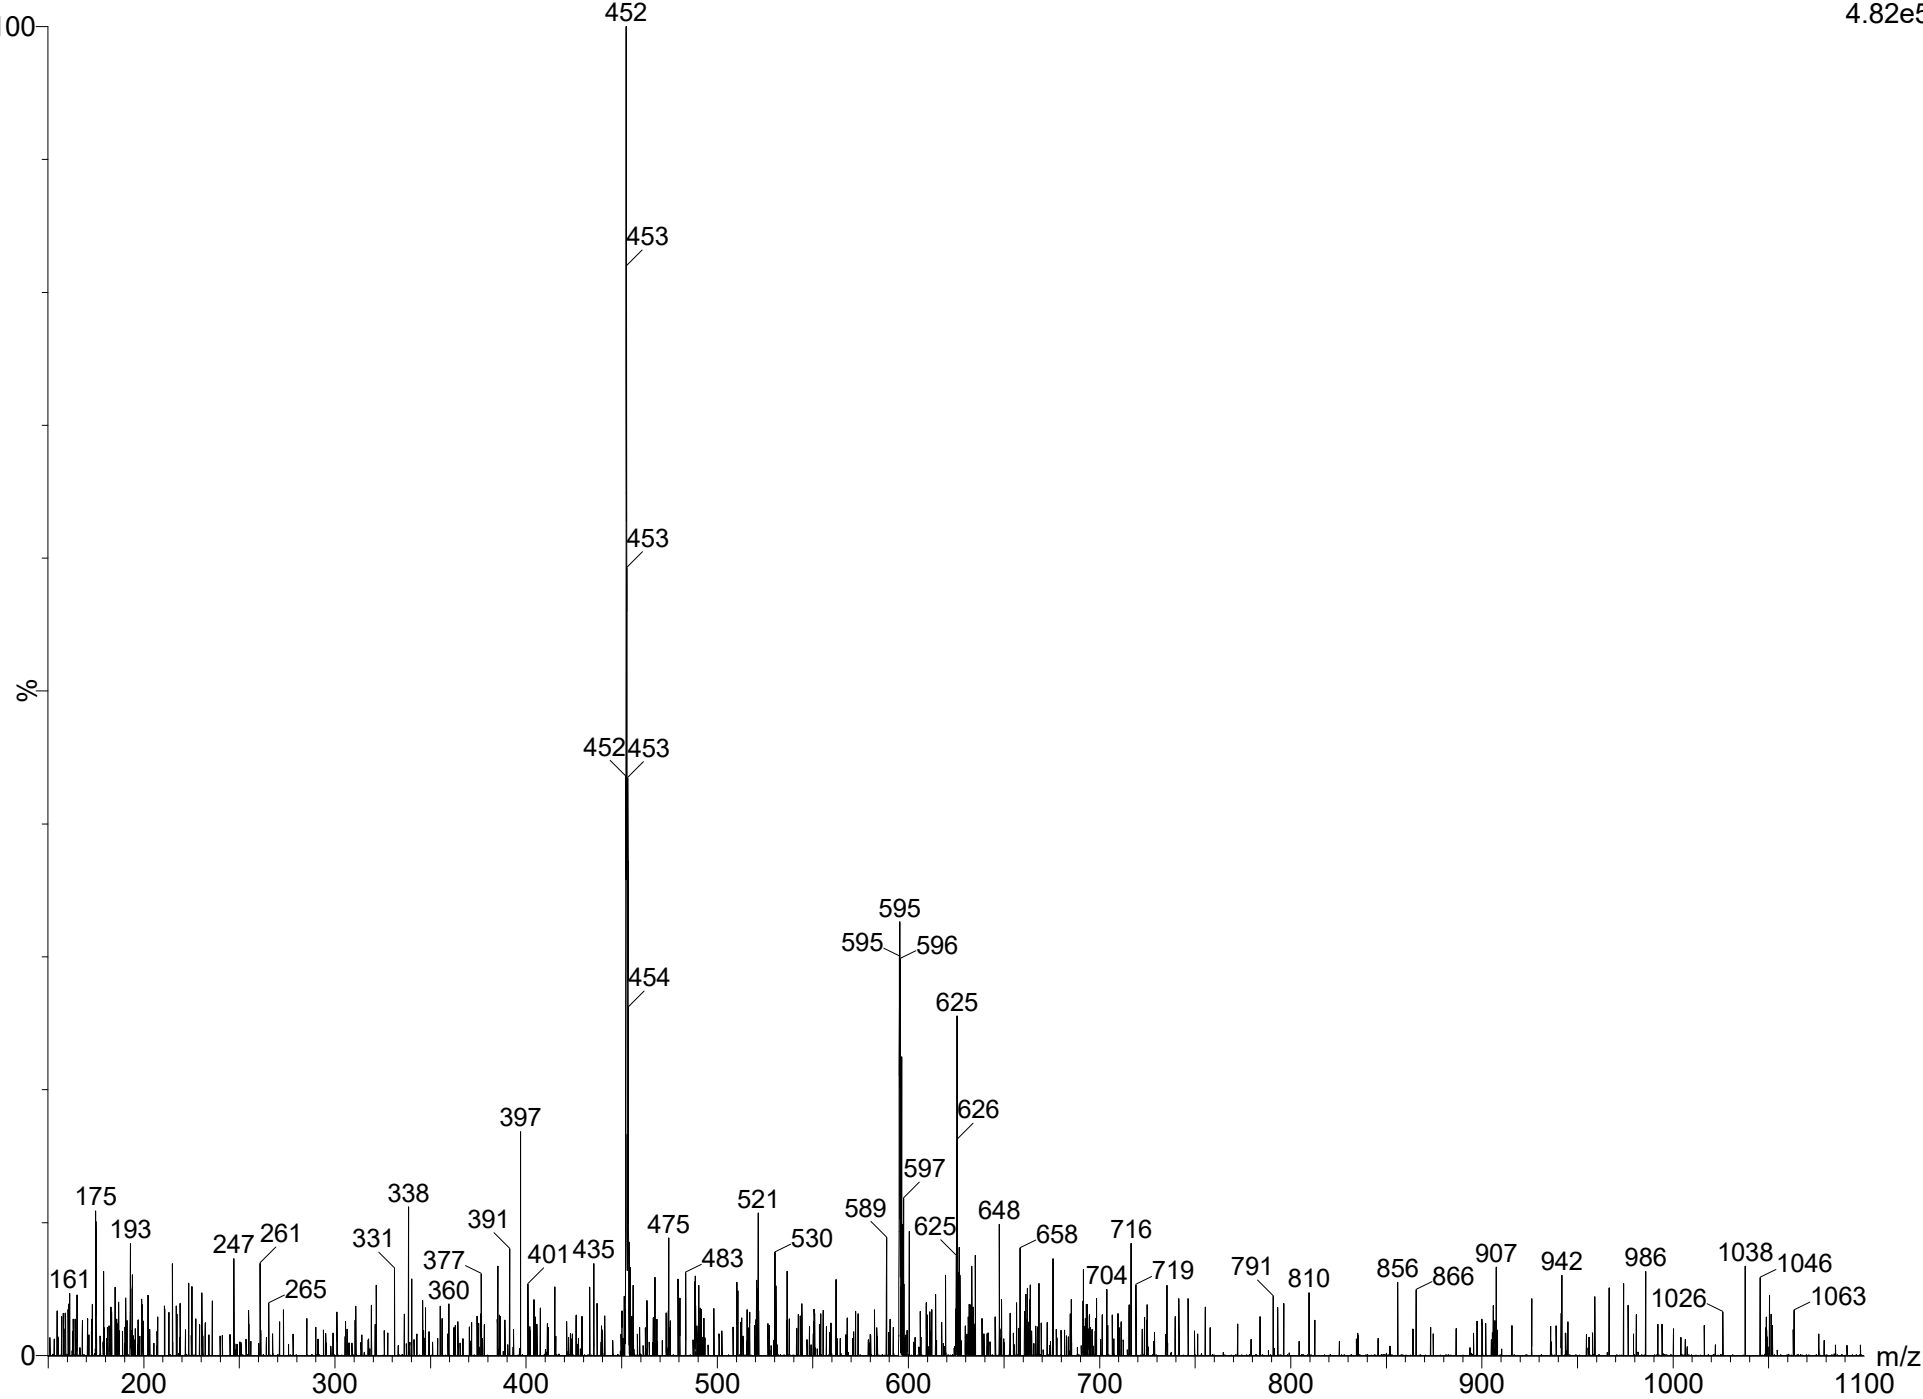

Supplement: s1 [file s1]

orzech\_pylek\_2 4126 (3.437)

2: Diode Array  
1.446e-1

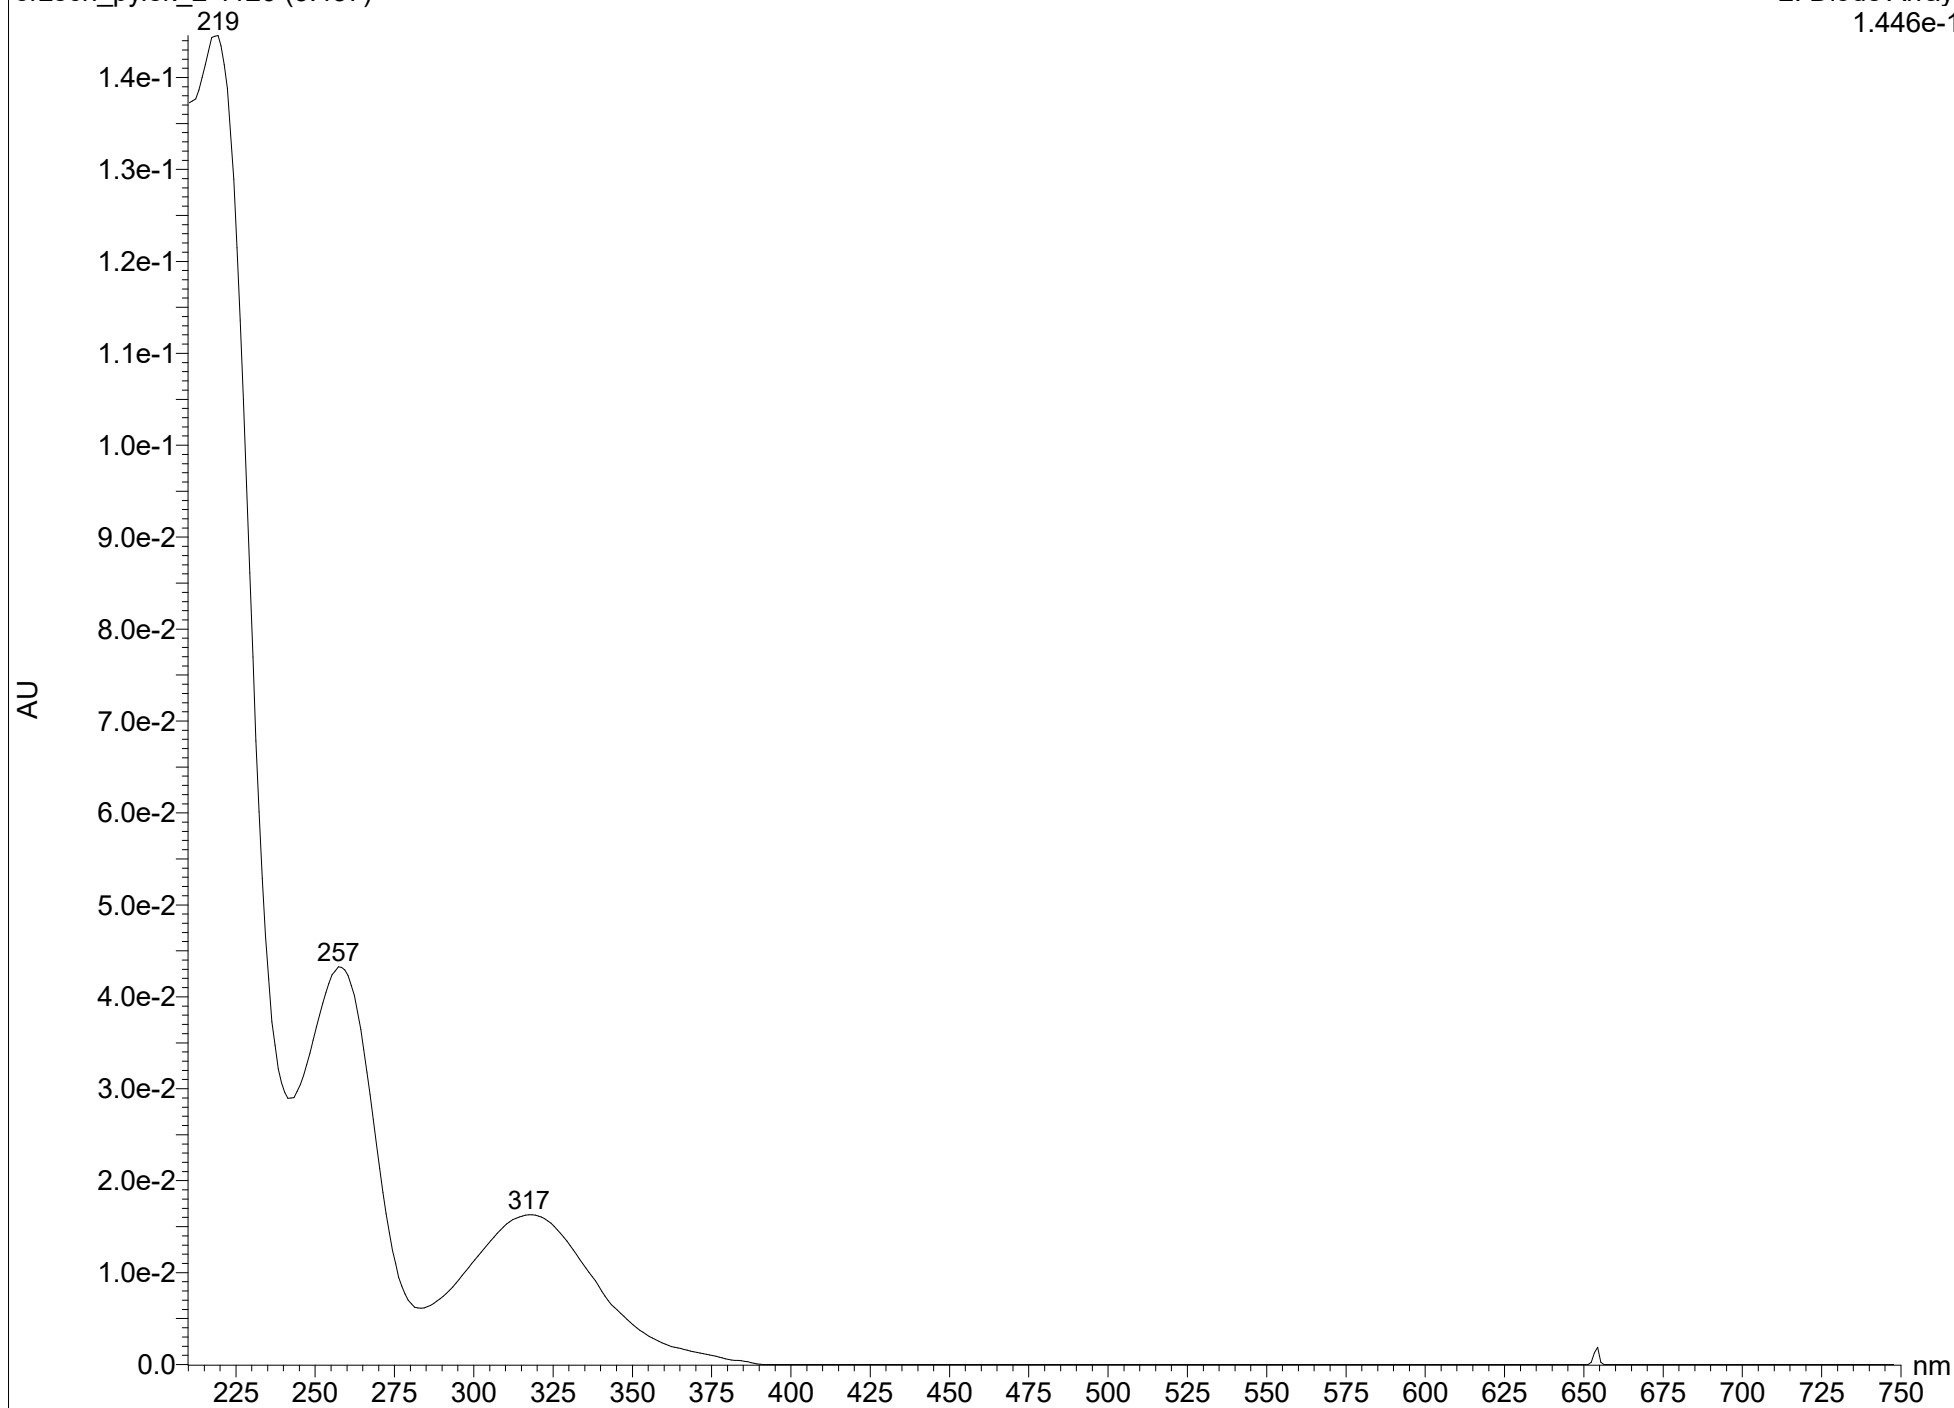

Supplement: s1 [file s1]

orzech\_pylek\_2 637 (5.427) Cm (633:641)

1: Scan ES-  
1.40e6

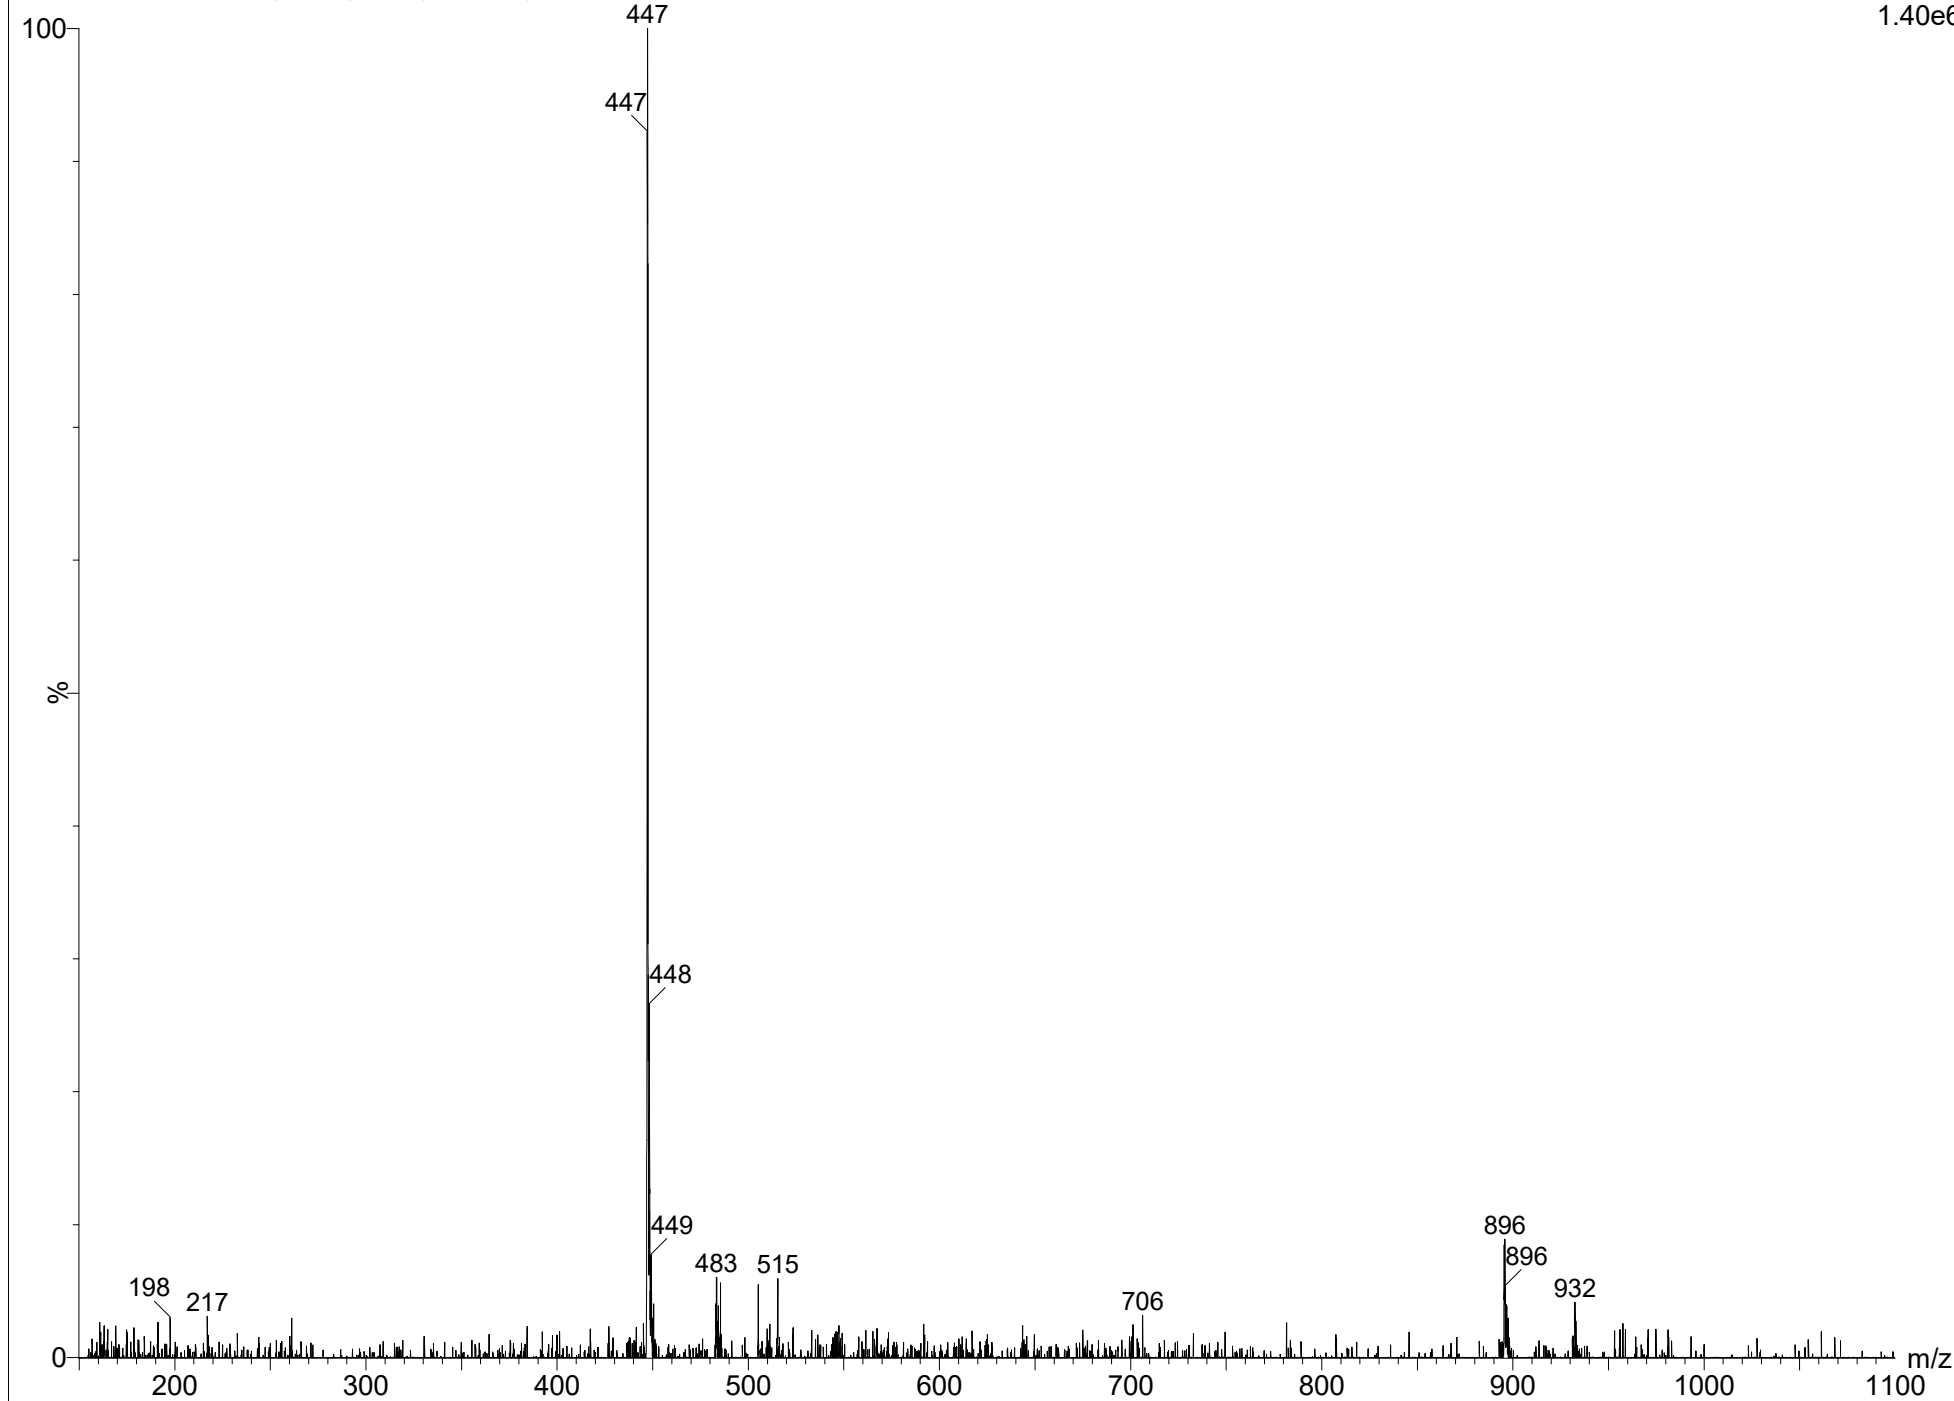

Supplement: s1 [file s1]

orzech\_pylek\_2 439 (3.740) Cm (435:444)

1: Scan ES-  
1.27e5

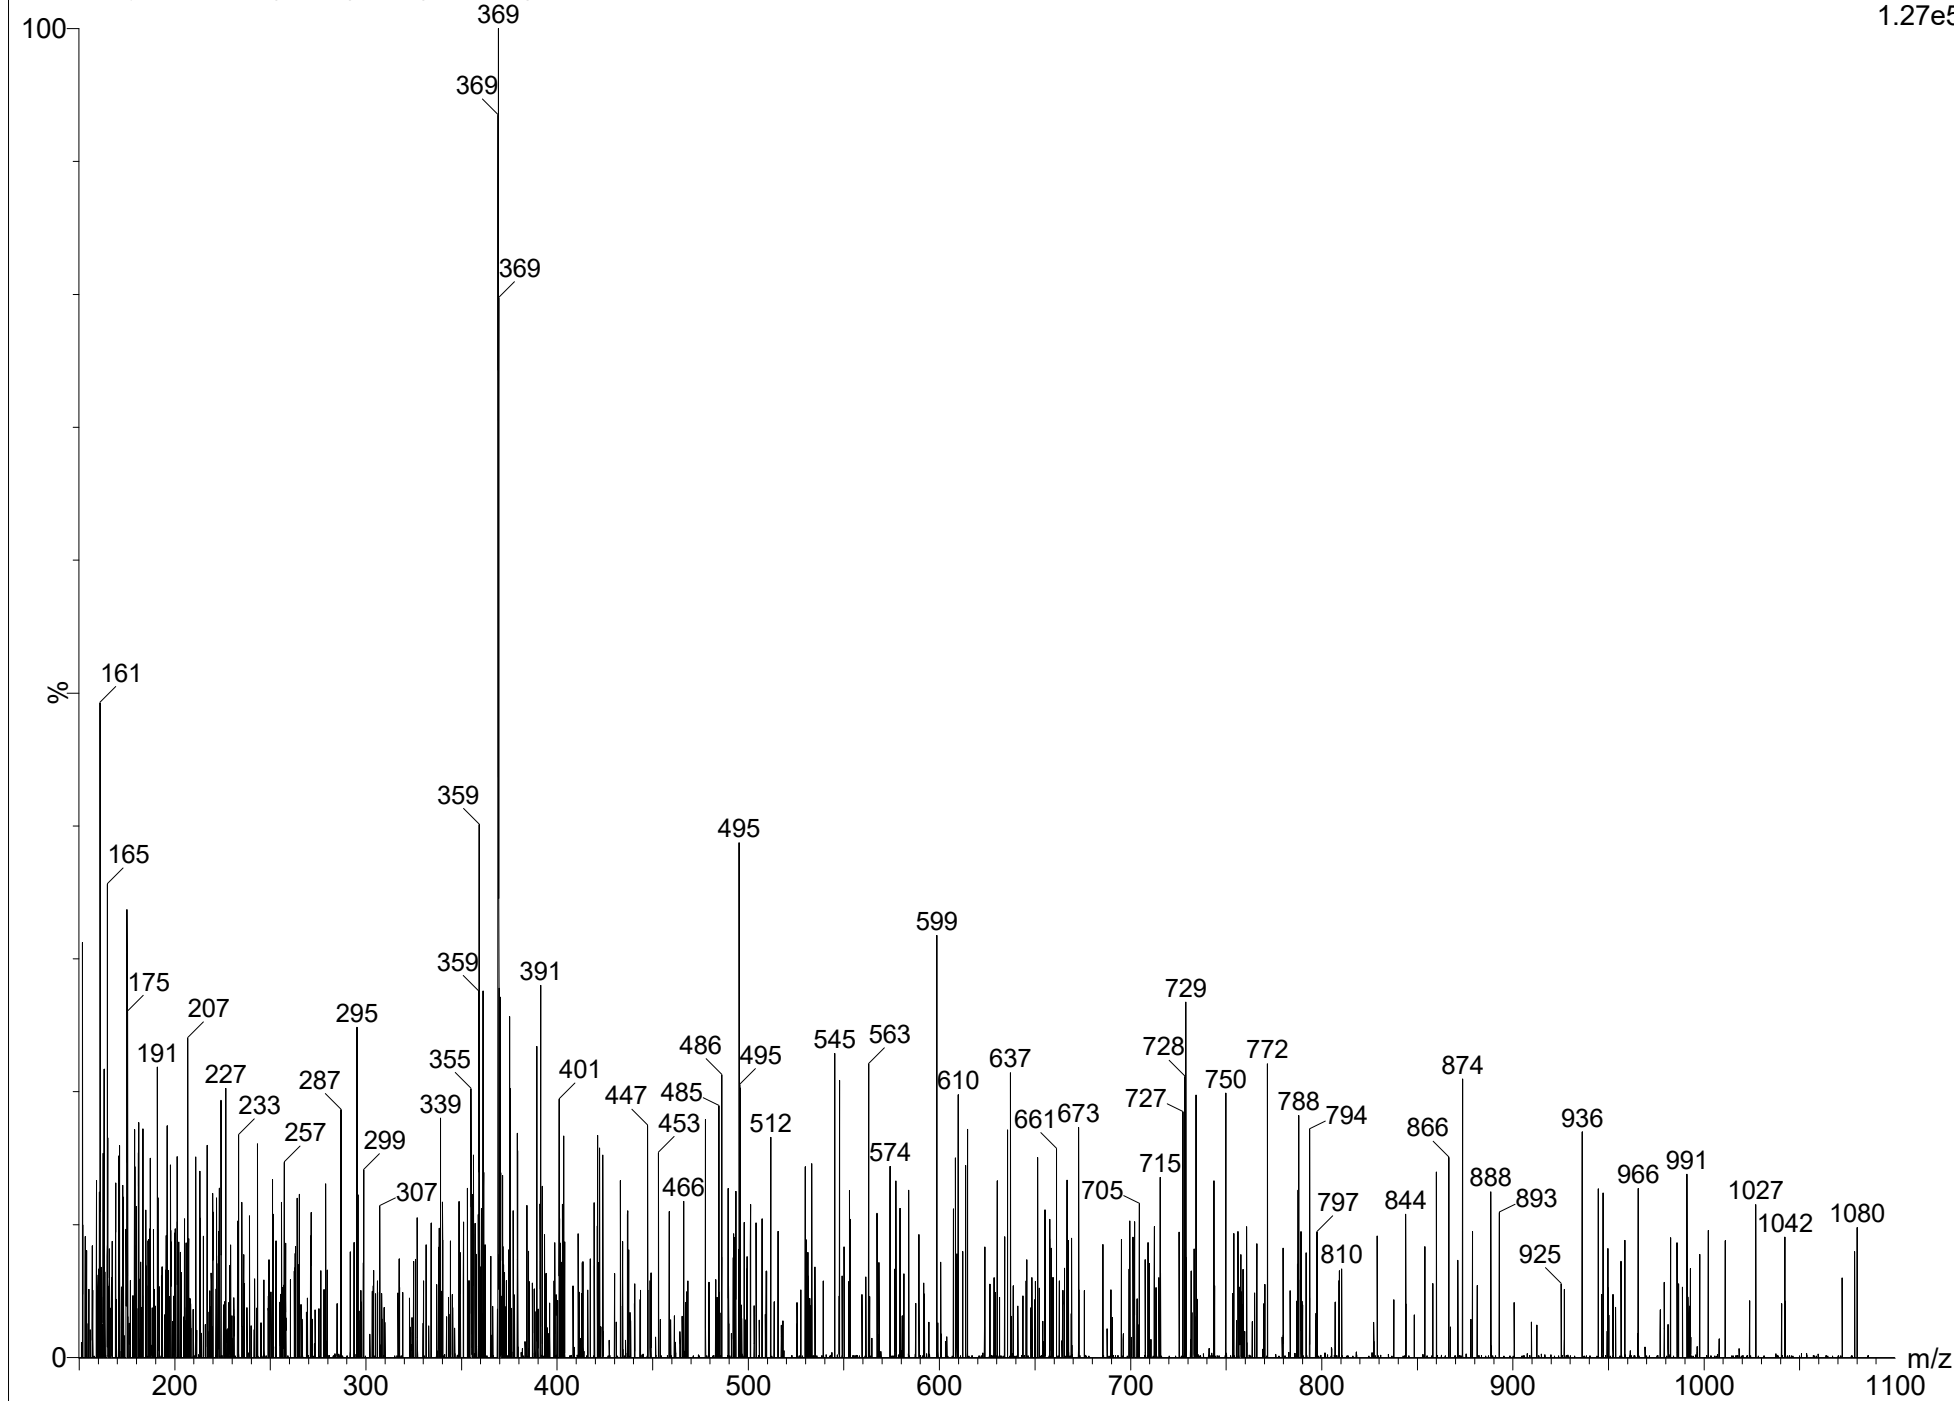

Supplement: s1 [file s1]

orzech\_pylek\_2 607 (5.172)

1: Scan ES-  
4.35e5

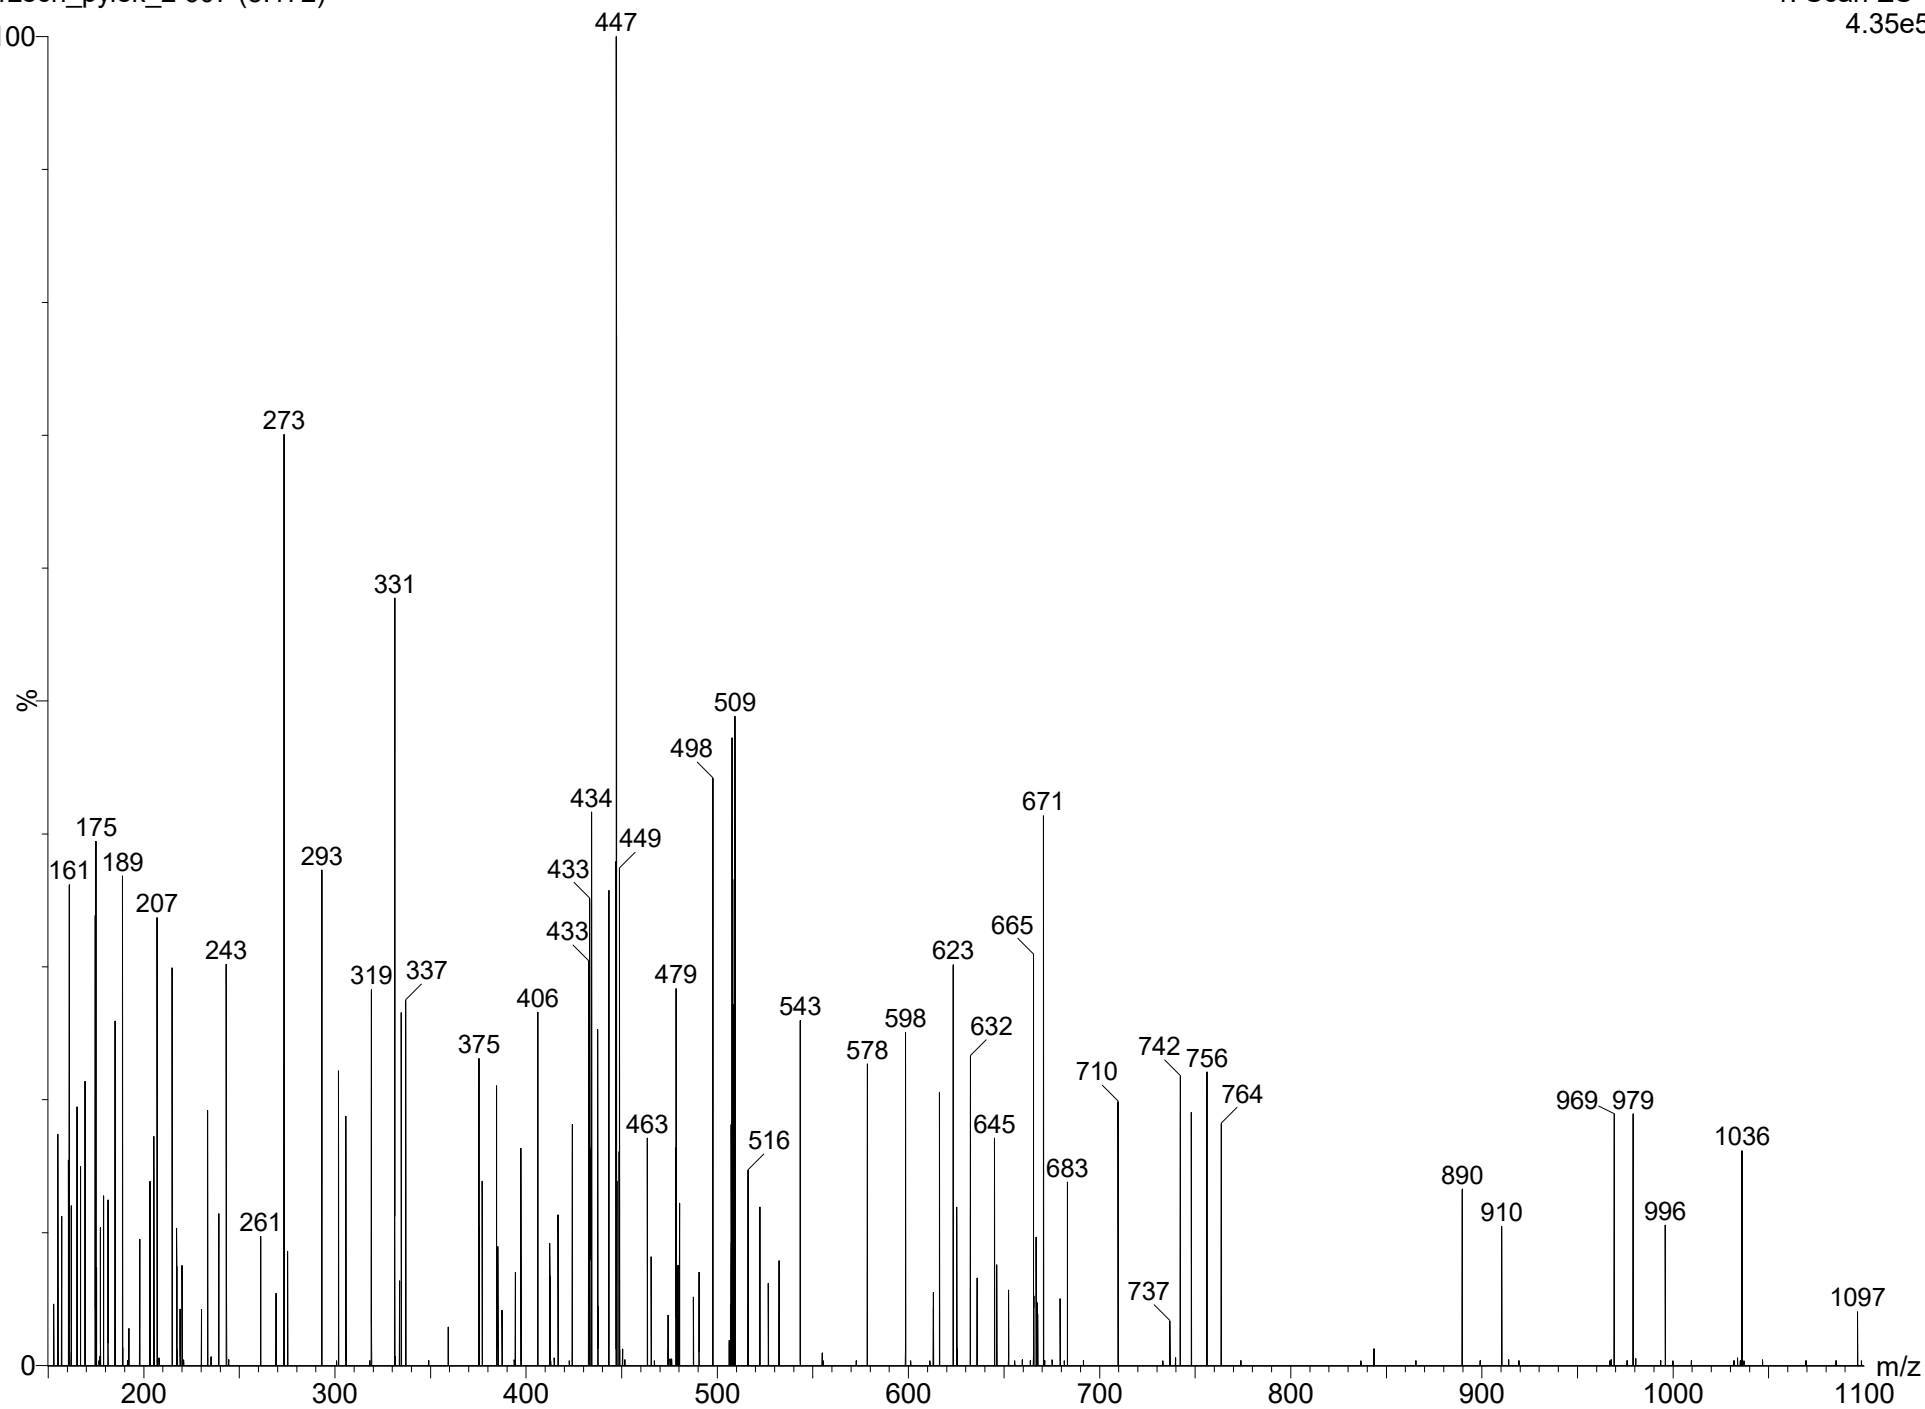

Supplement: s1 [file s1]

orzech\_pylek\_2

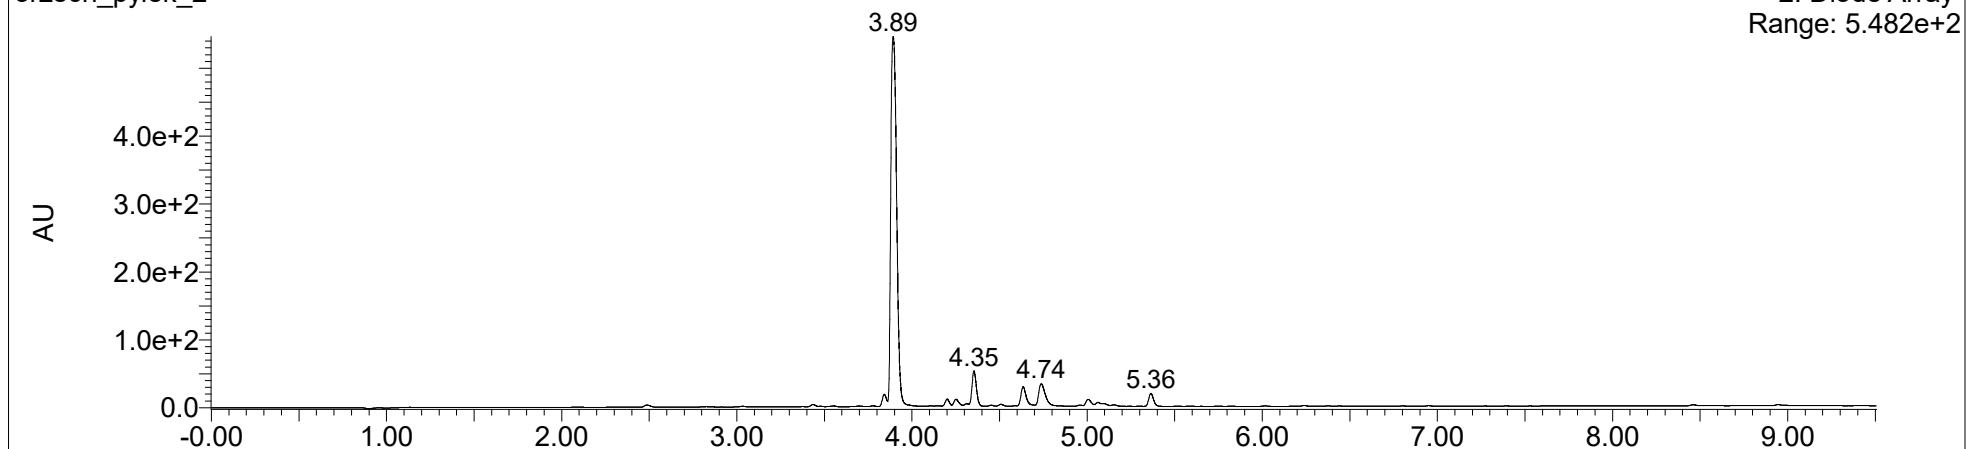

orzech\_pylek\_2

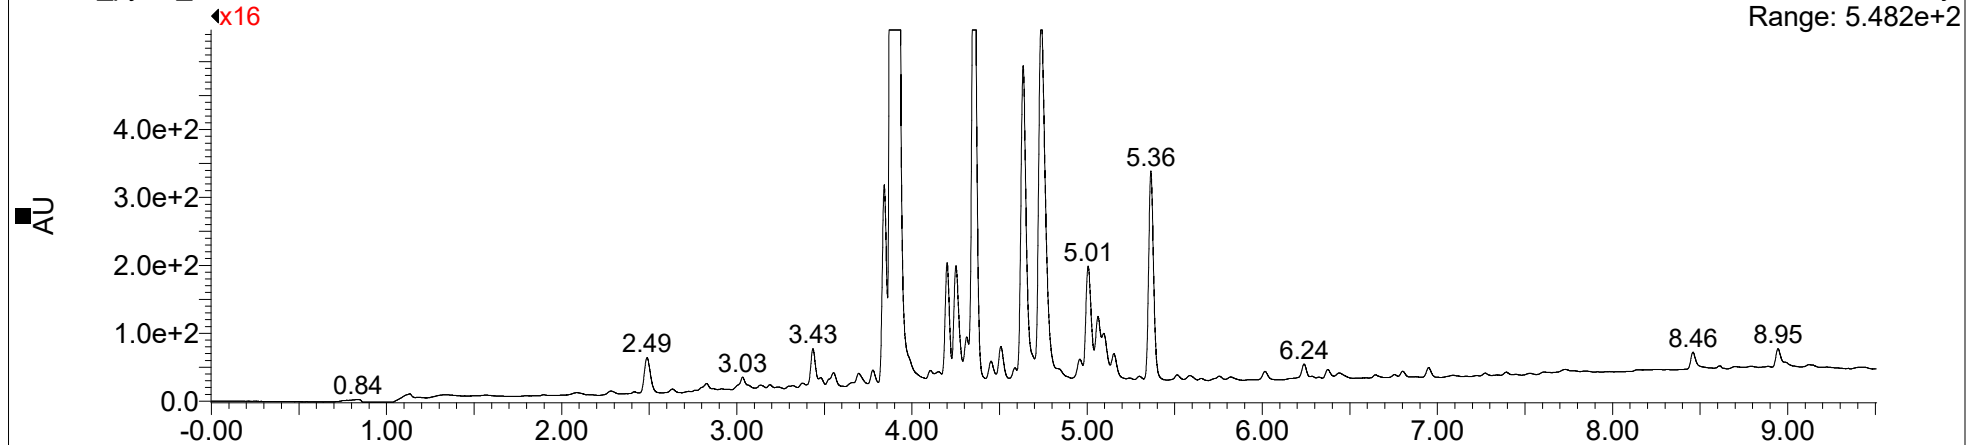

orzech\_pylek\_2 Sm (SG, 2x1)

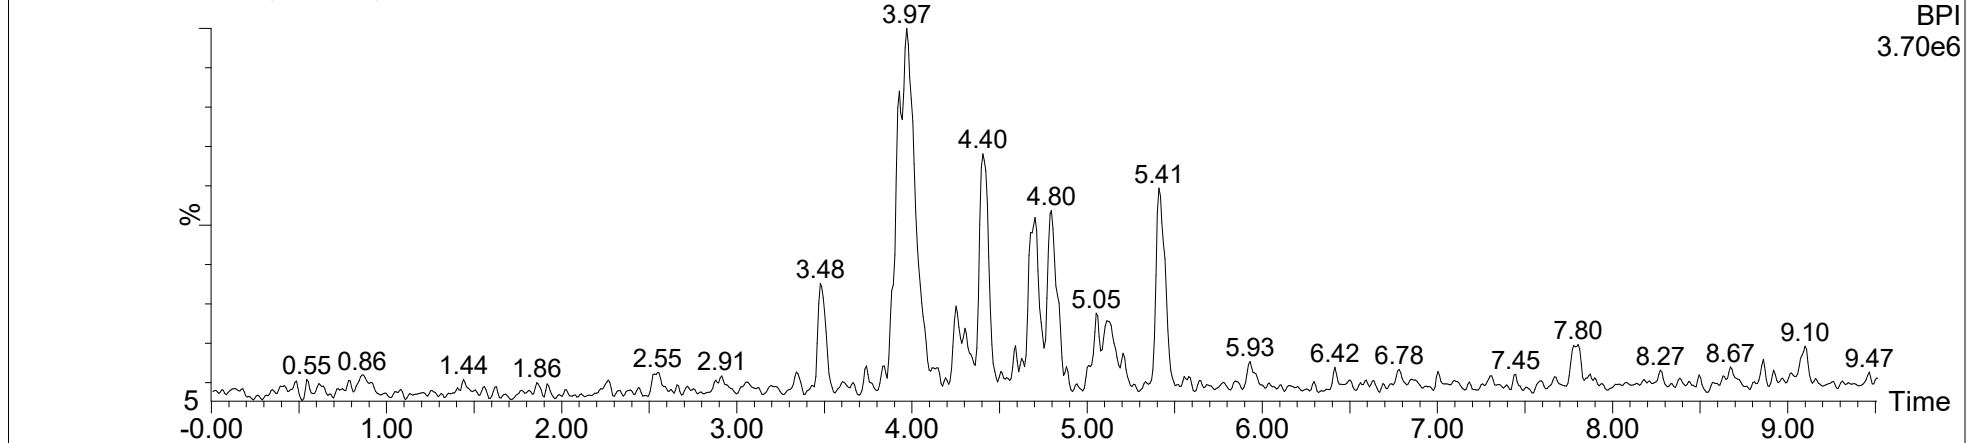

Supplement: s1 [file s1]

orzech\_pylek\_2 563 (4.797) Cm (557:563-560:571)

1: Scan ES-  
1.90e5

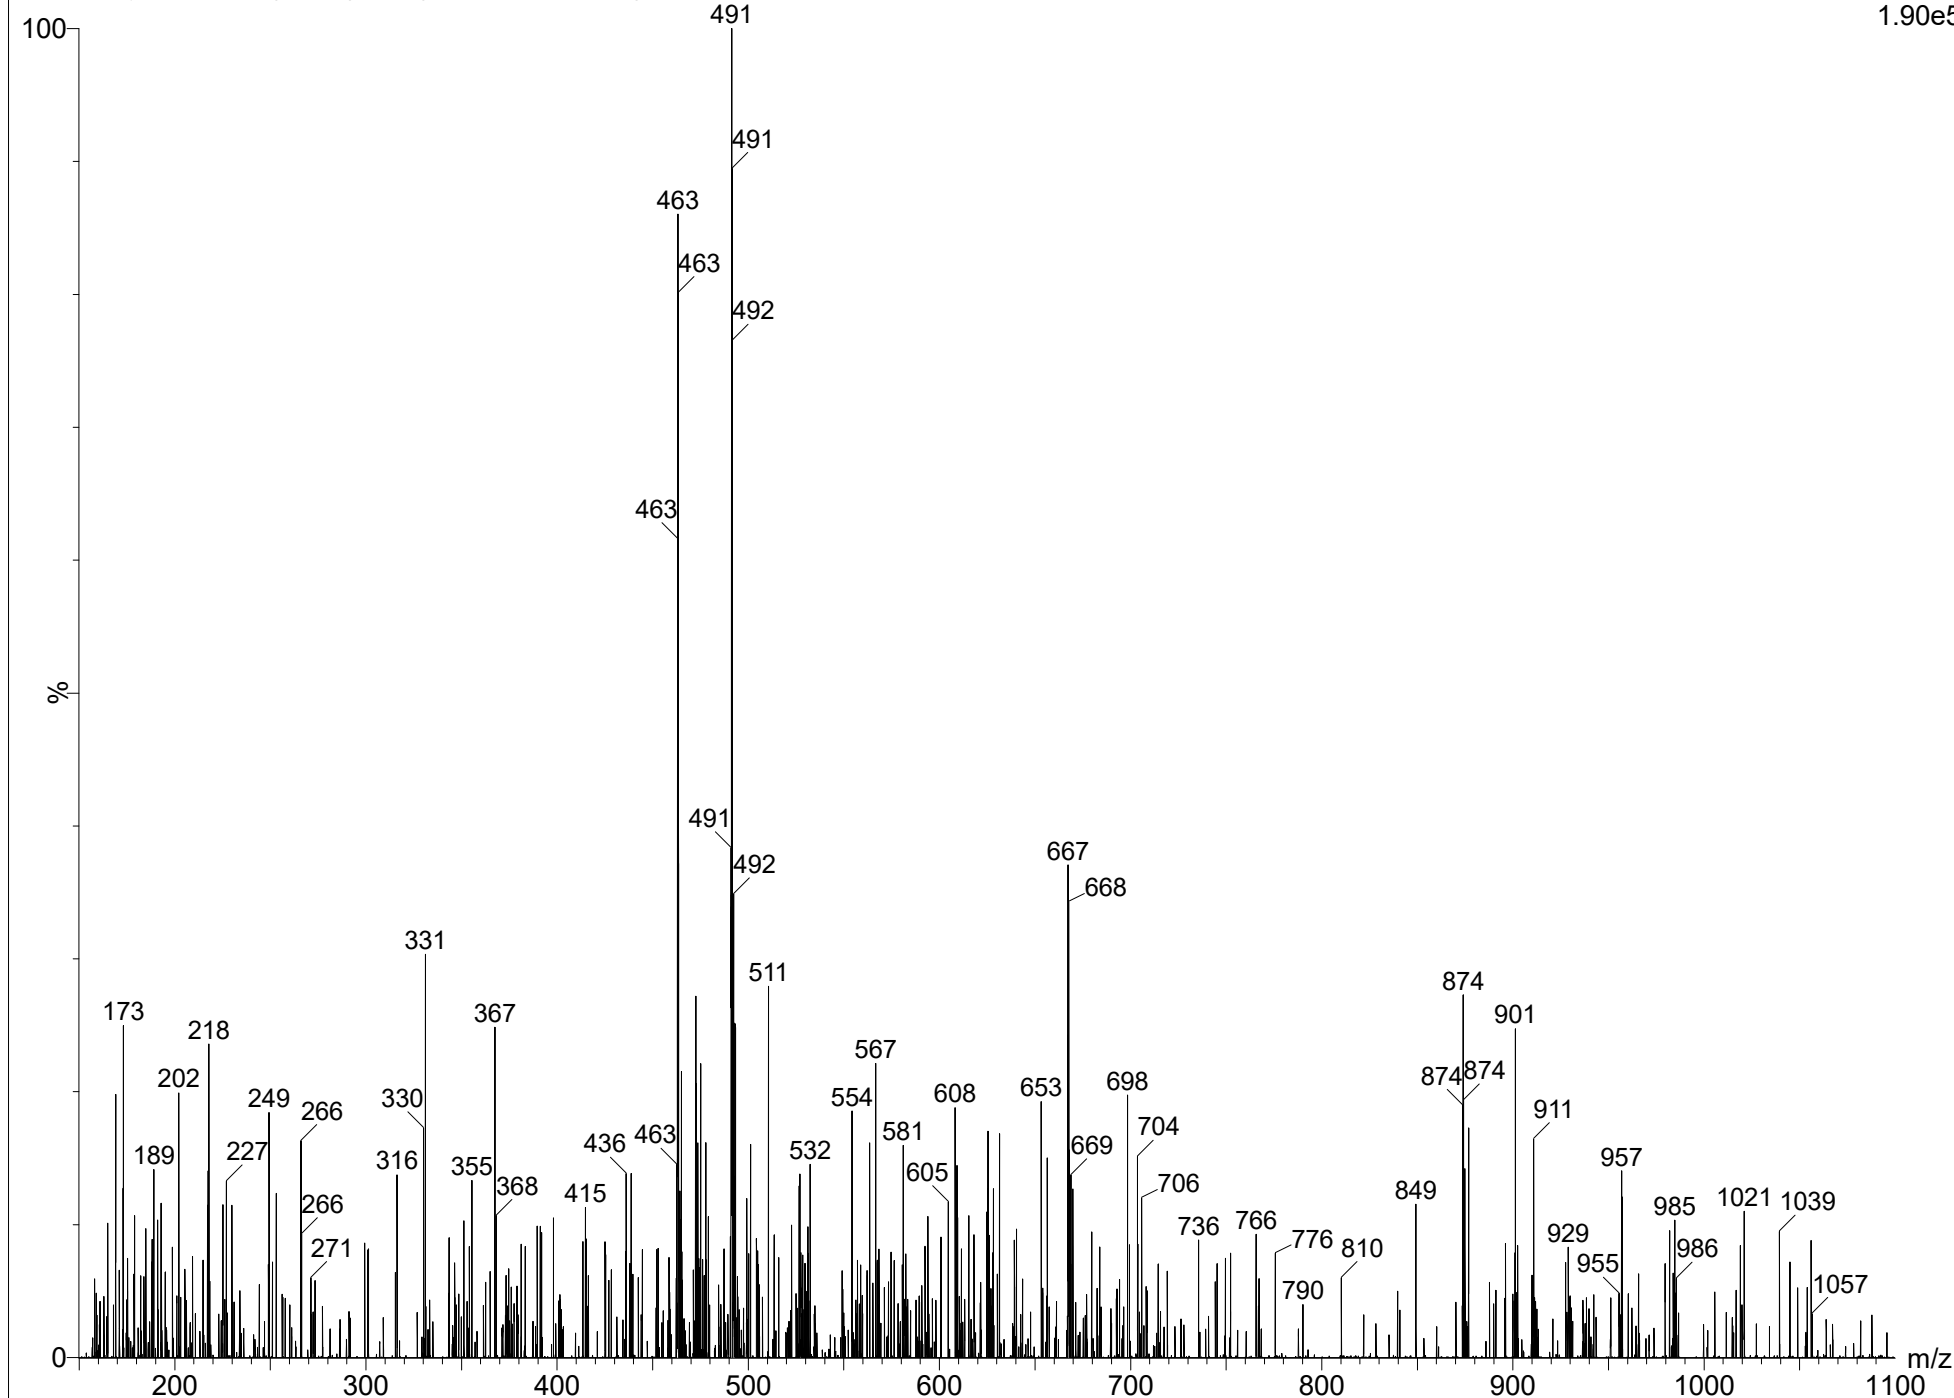

Supplement: s1 [file s1]

orzech\_pylek\_2 539 (4.592) Cm (529:540)

1: Scan ES-  
2.56e5

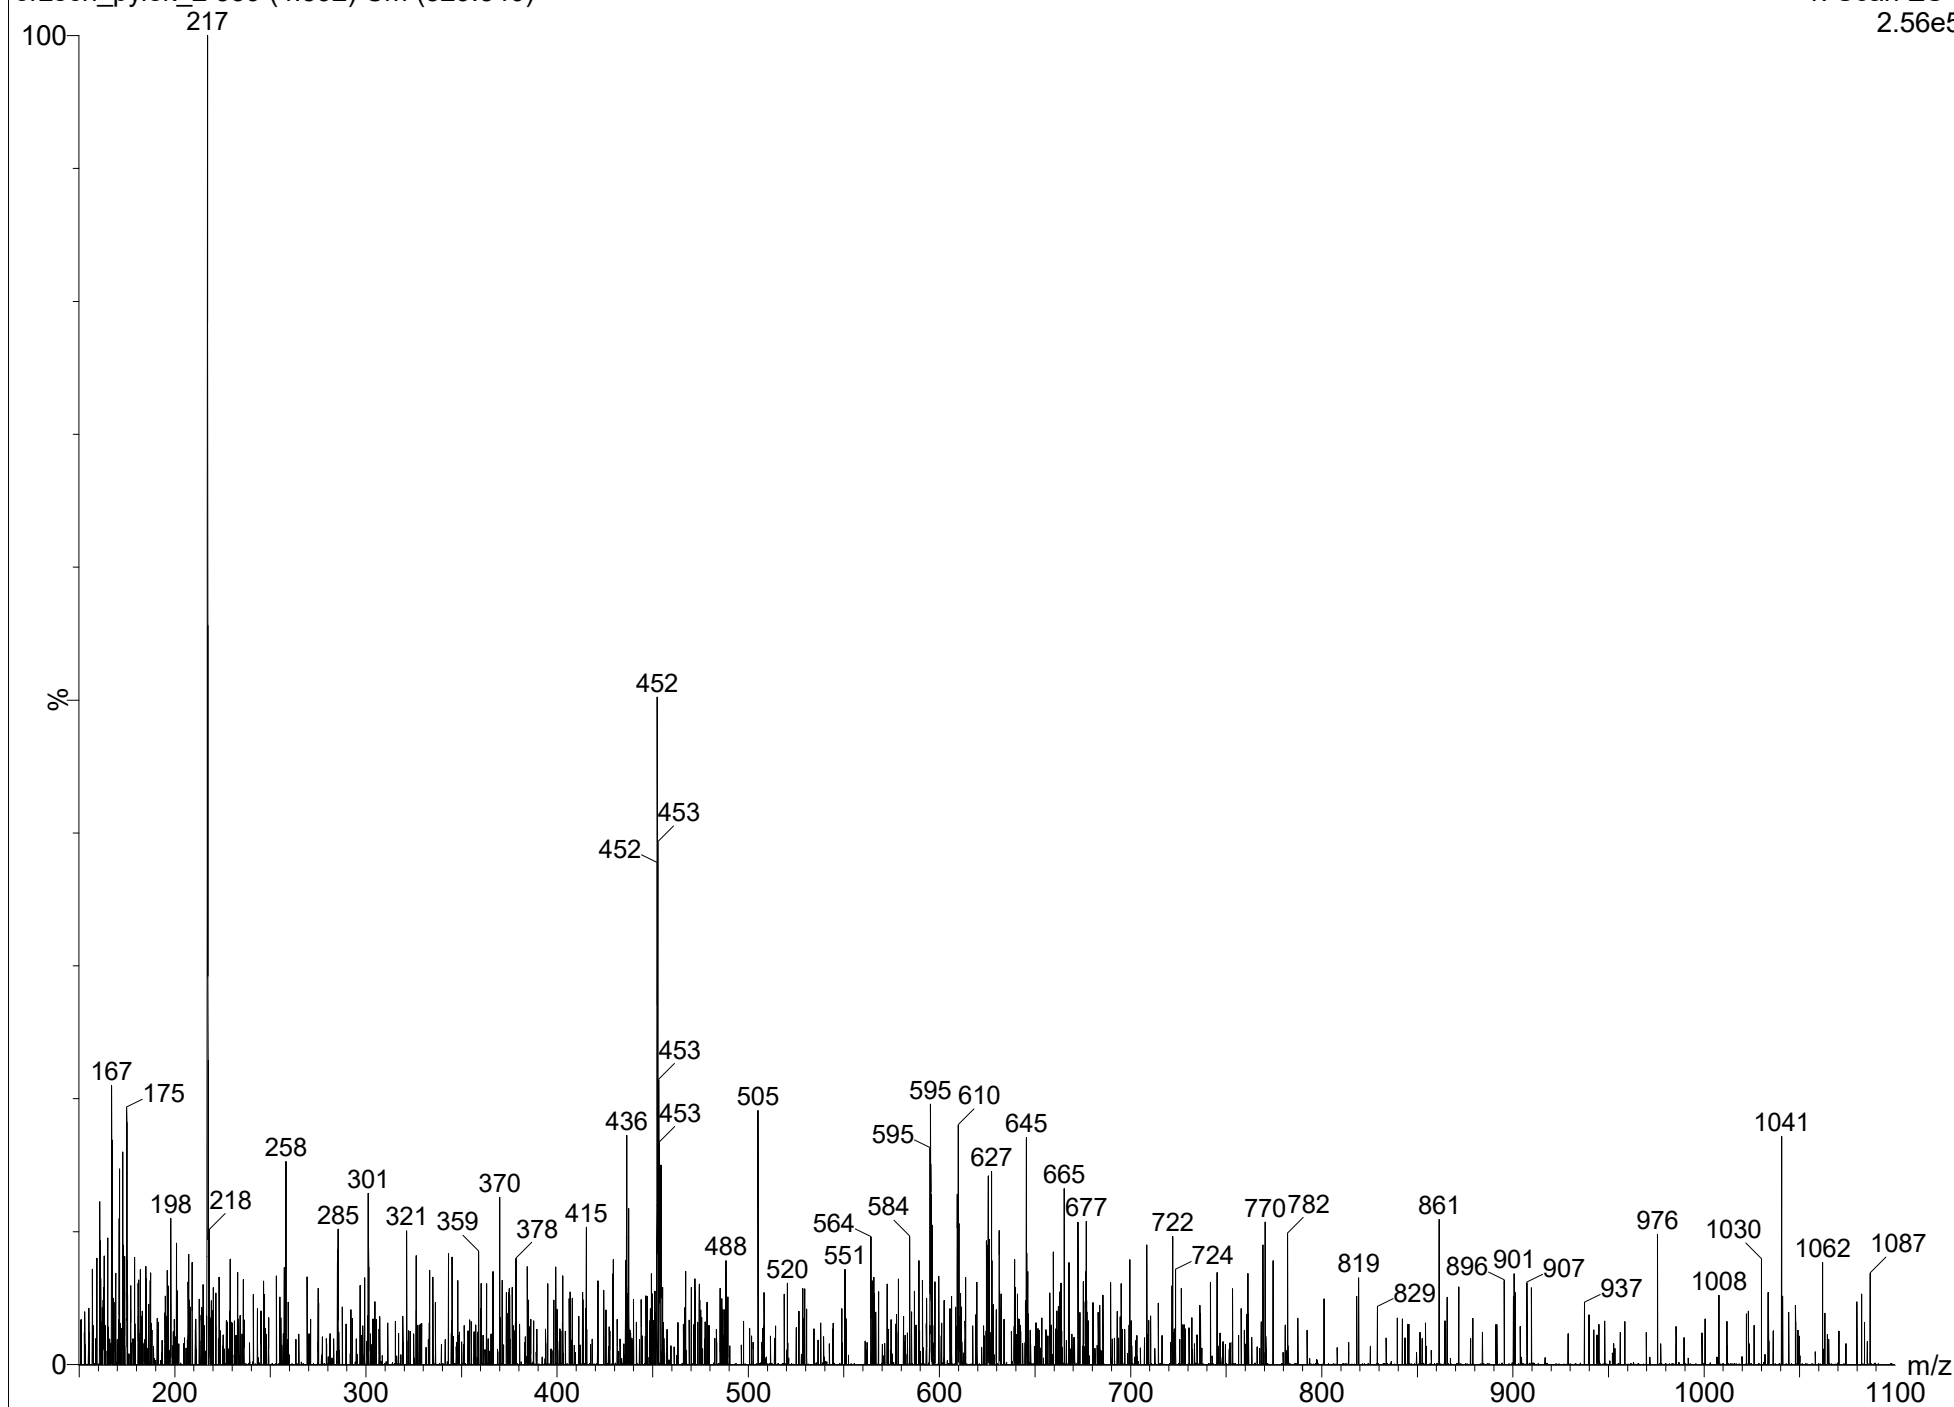

Supplement: s1 [file s1]

orzech\_pylek\_2 516 (4.396) Cm (511:523)

1: Scan ES-  
1.18e6

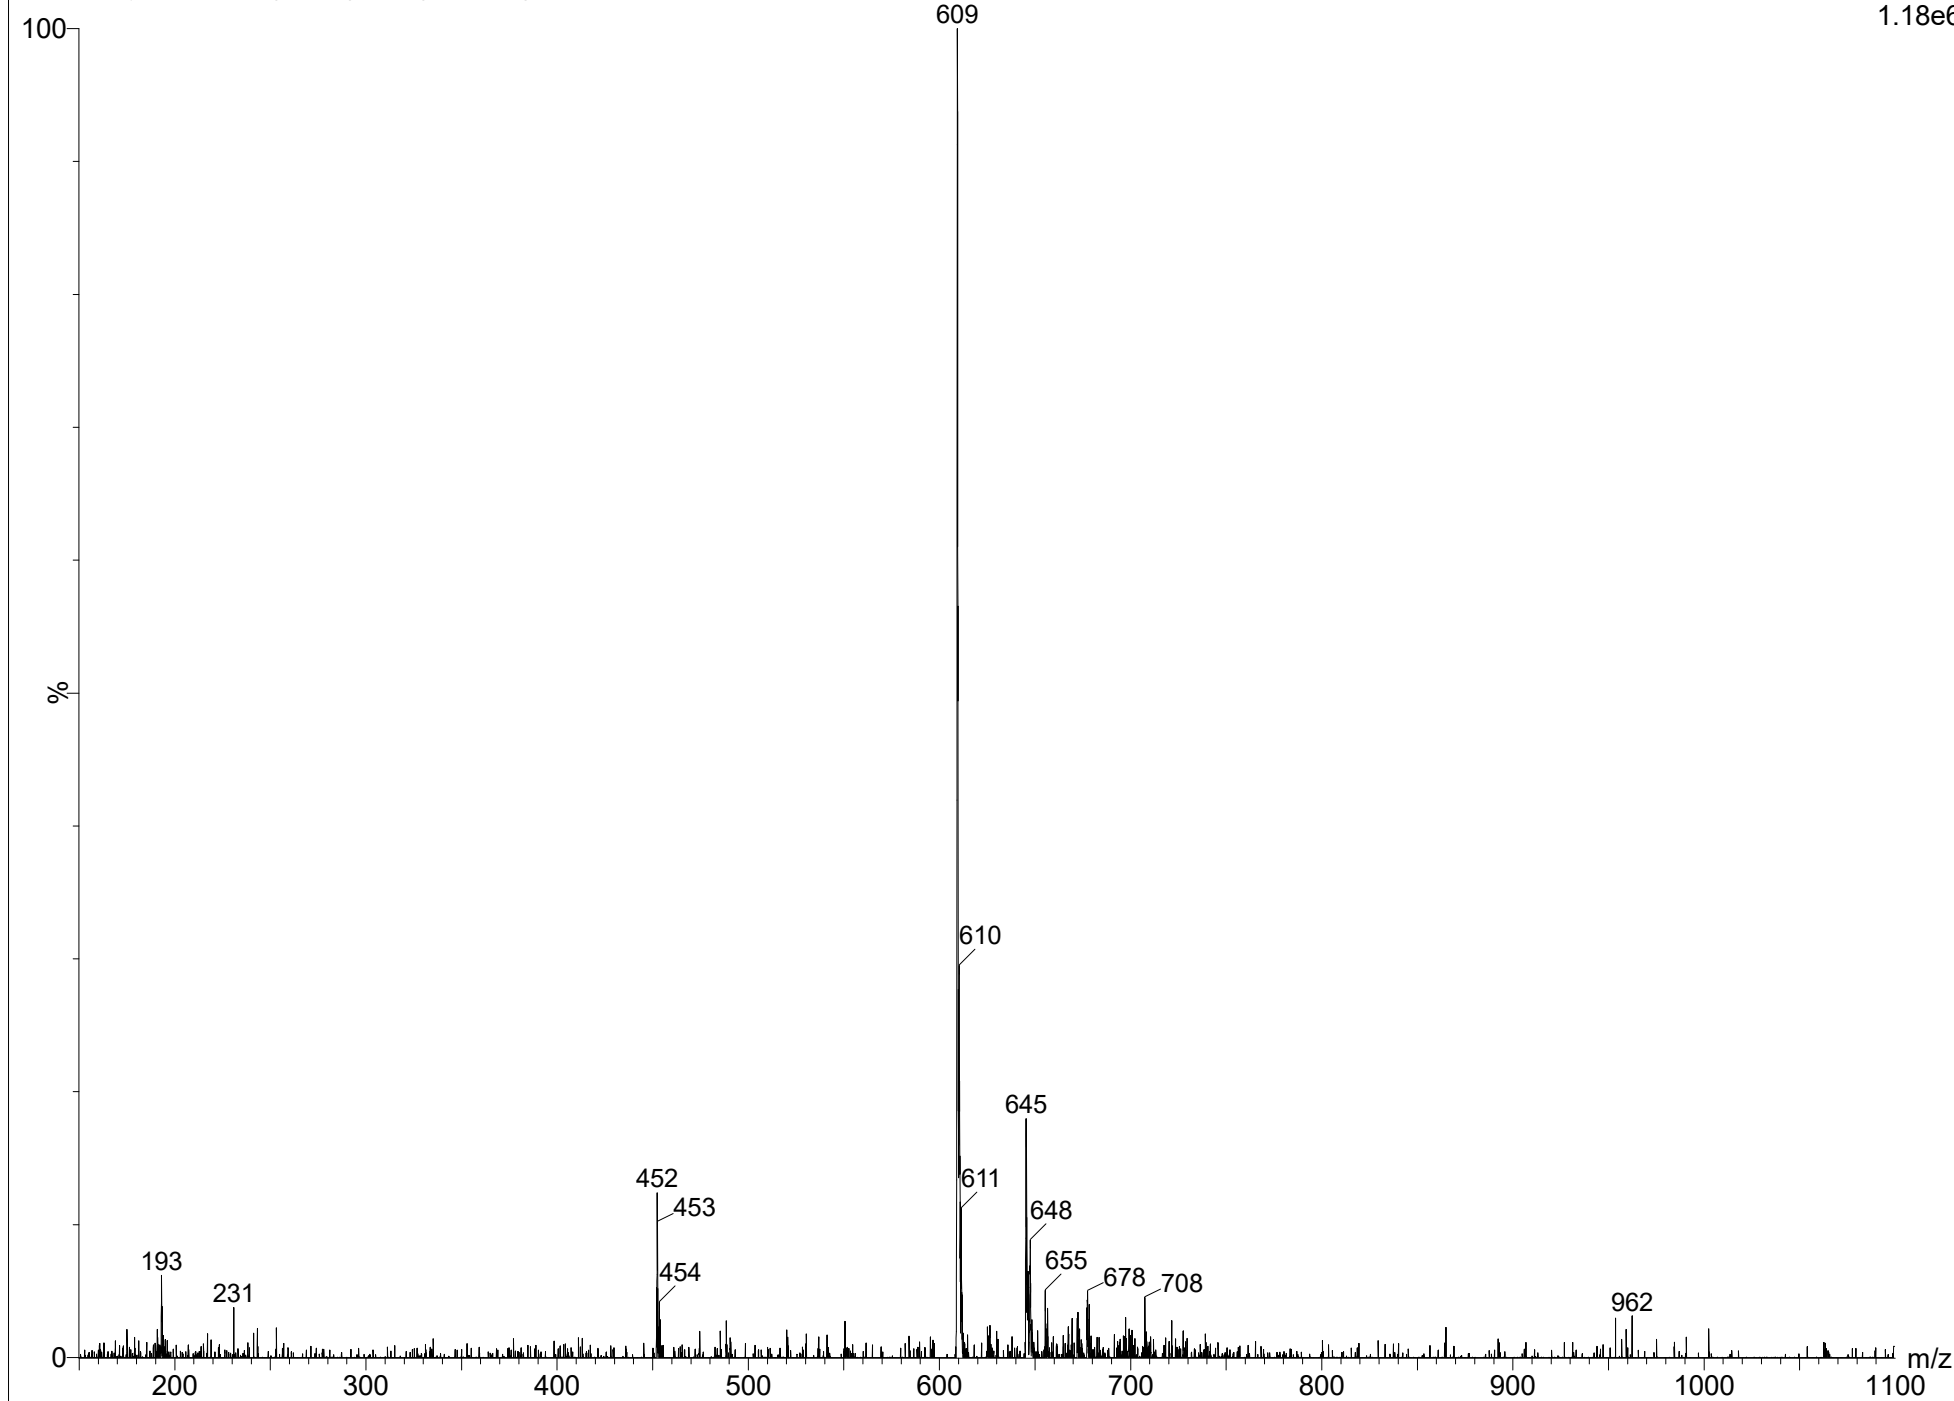

Supplement: s1 [file s1]

orzech\_pylek\_2 744 (6.339) Cm (733:744)

1: Scan ES-  
7.80e4

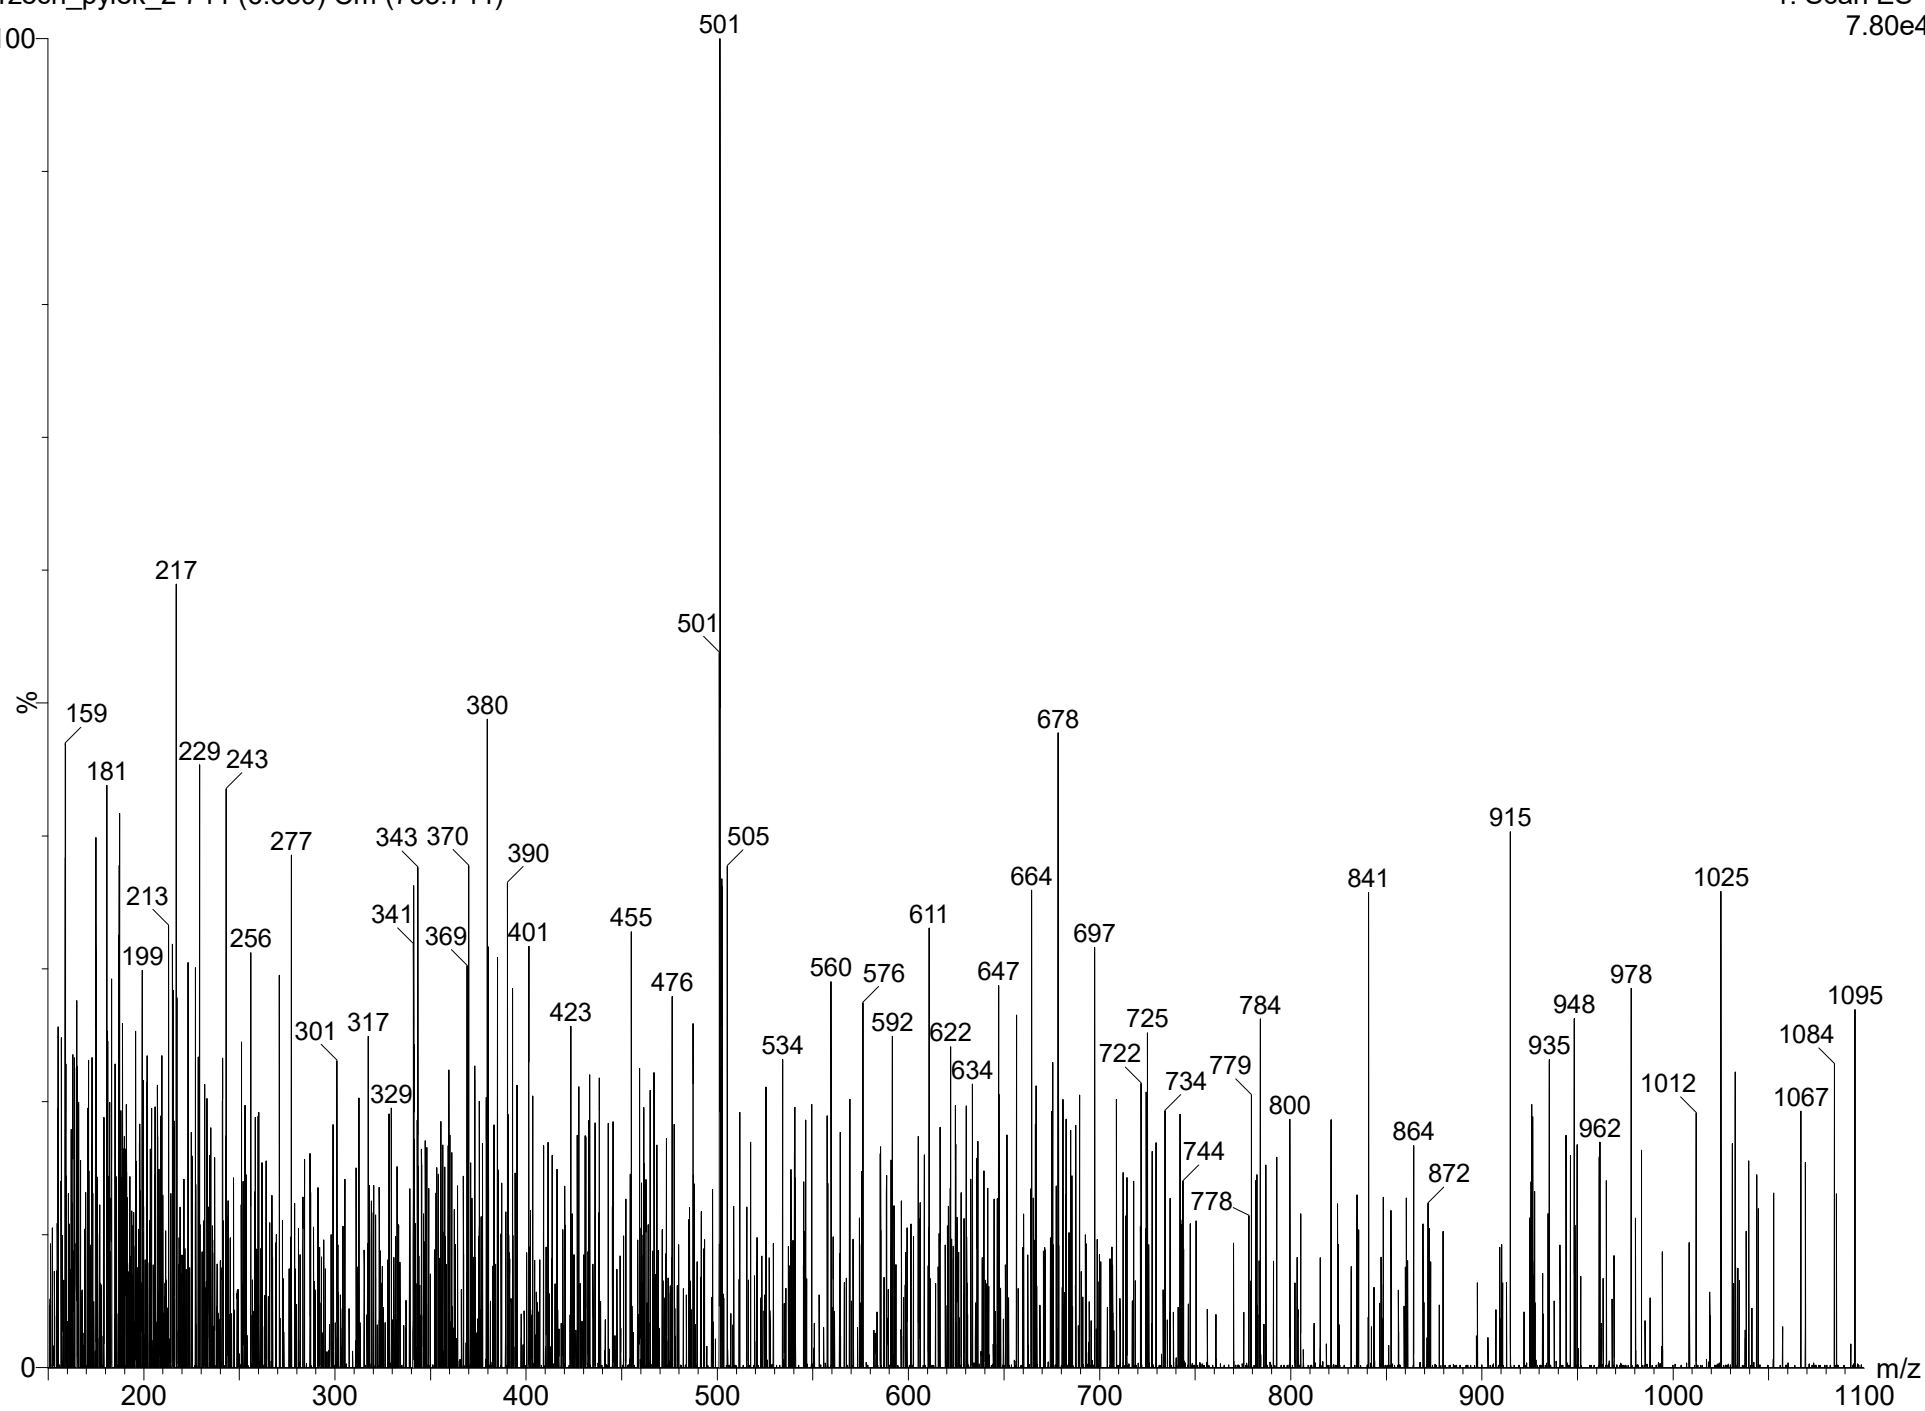

Supplement: s1 [file s1]

orzech\_pylek\_2 753 (6.416) Cm (750:757)

1: Scan ES-  
1.39e5

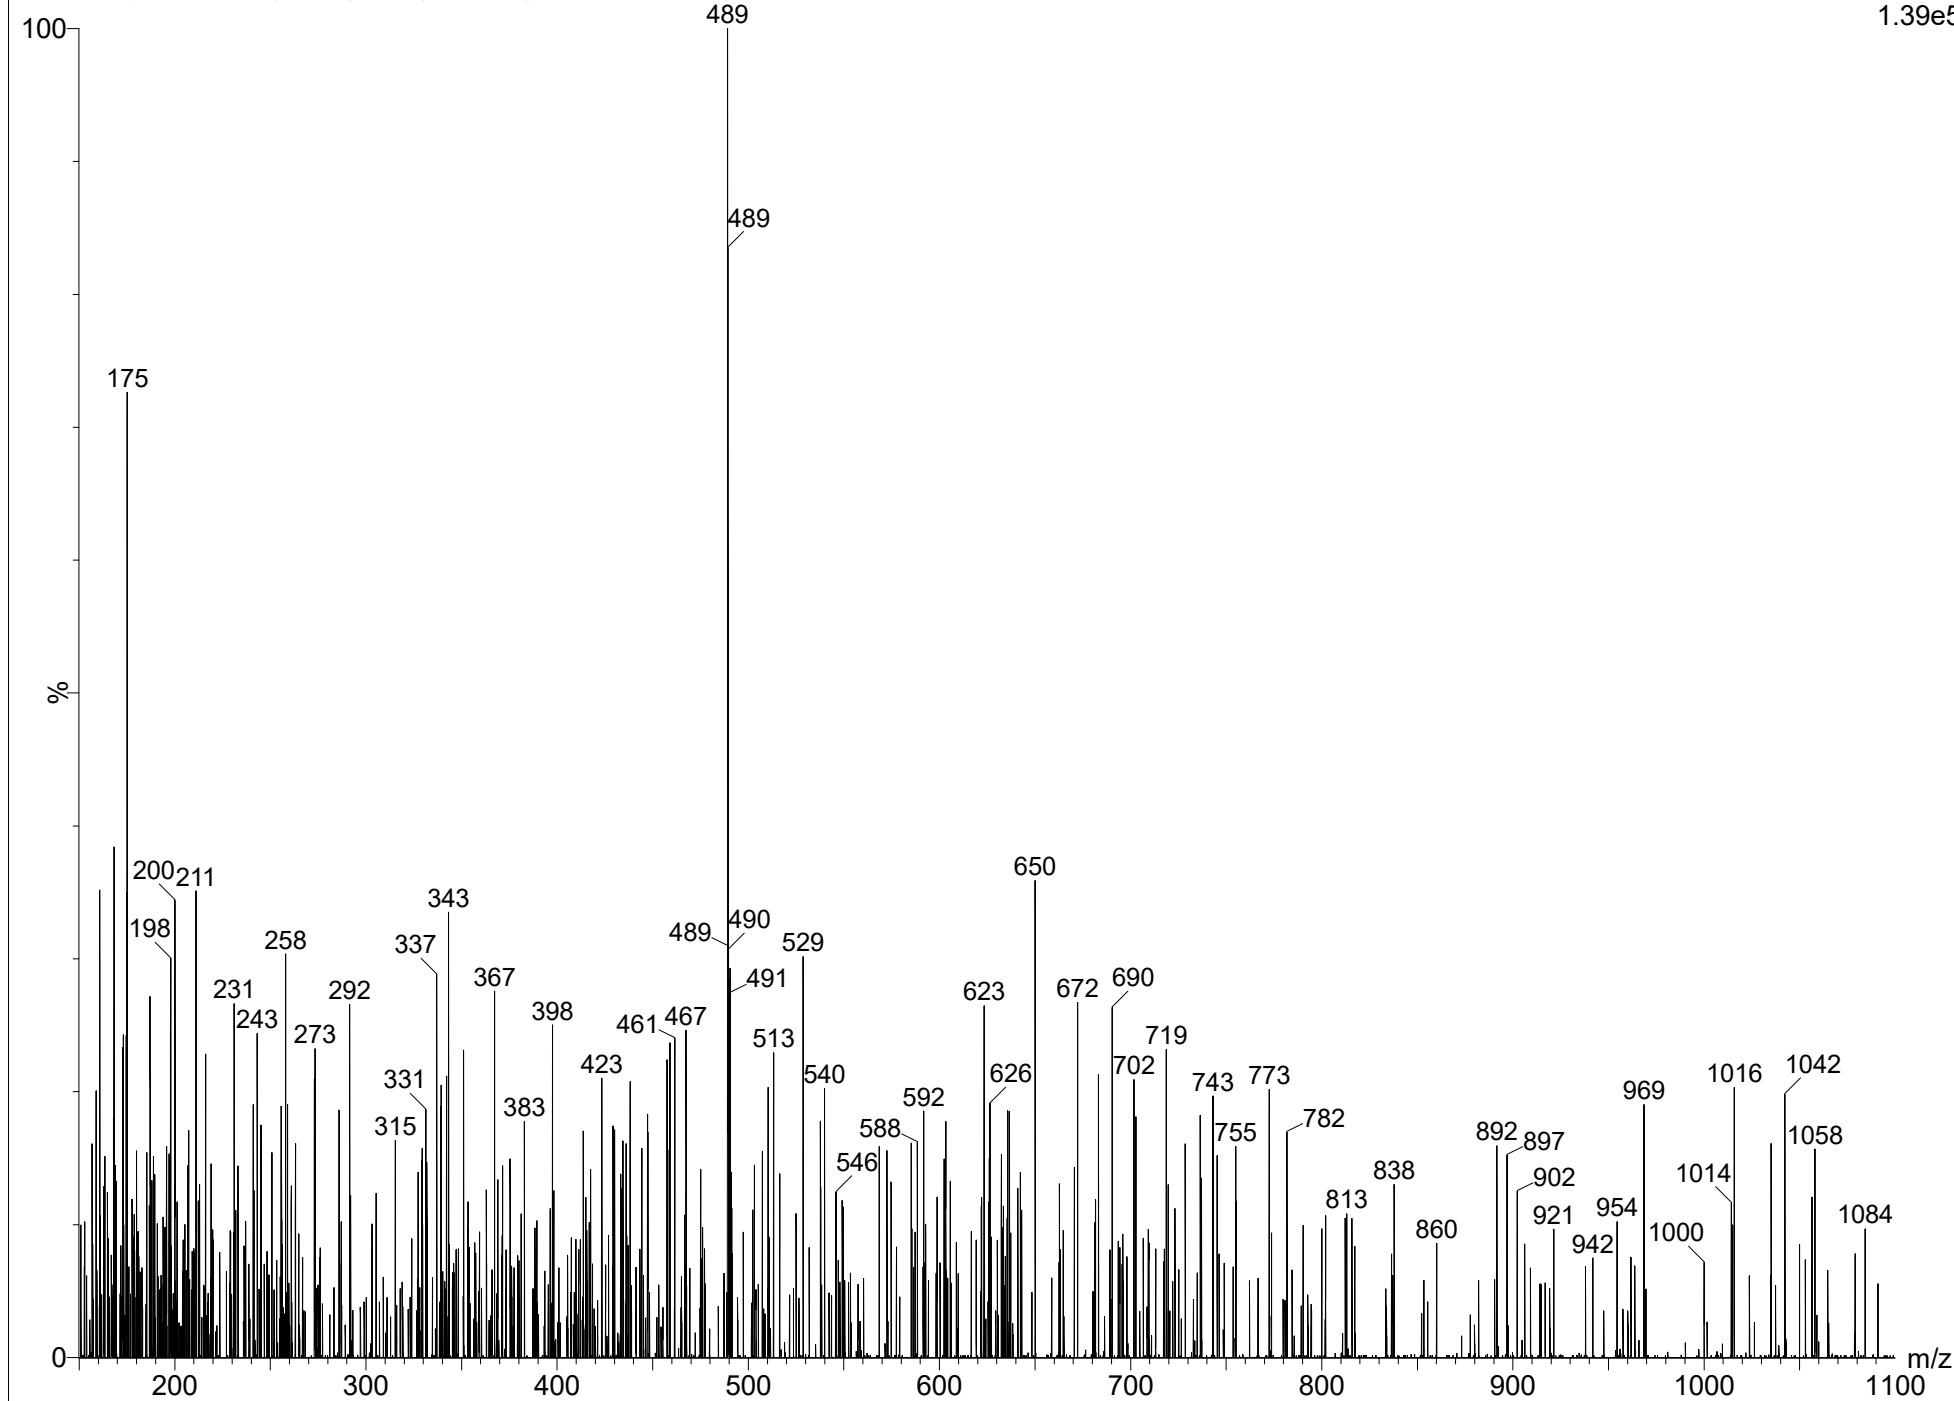

Supplement: s1 [file s1]

orzech\_pylek\_2 461 (3.928)

1: Scan ES-  
3.27e6

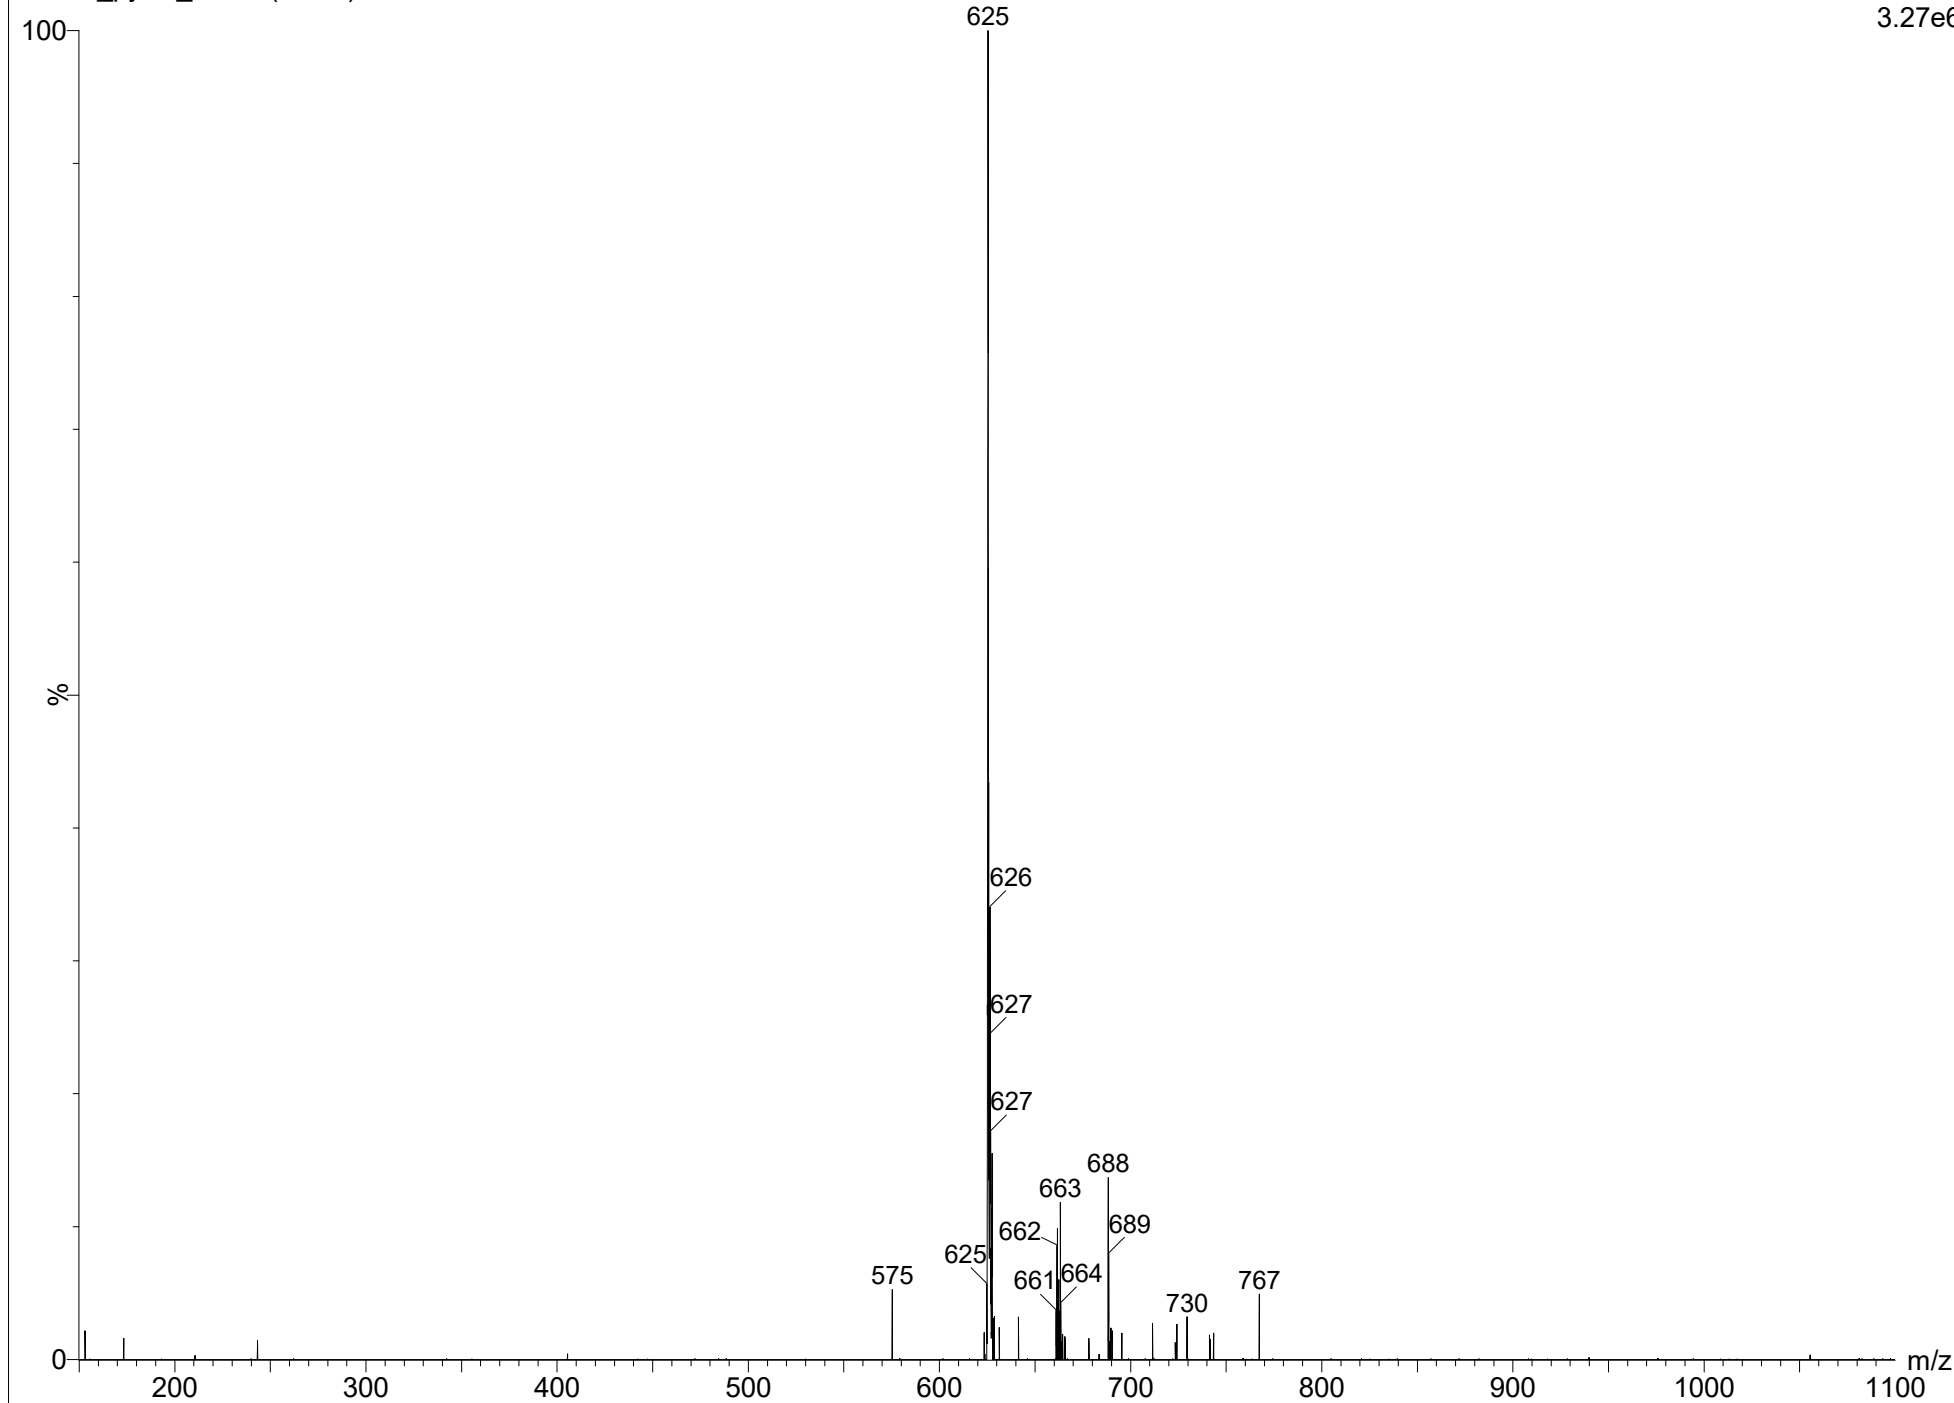

Supplement: s1 [file s1]

orzech\_pylek\_2 408 (3.476) Cm (407:413)

1: Scan ES-  
7.82e5

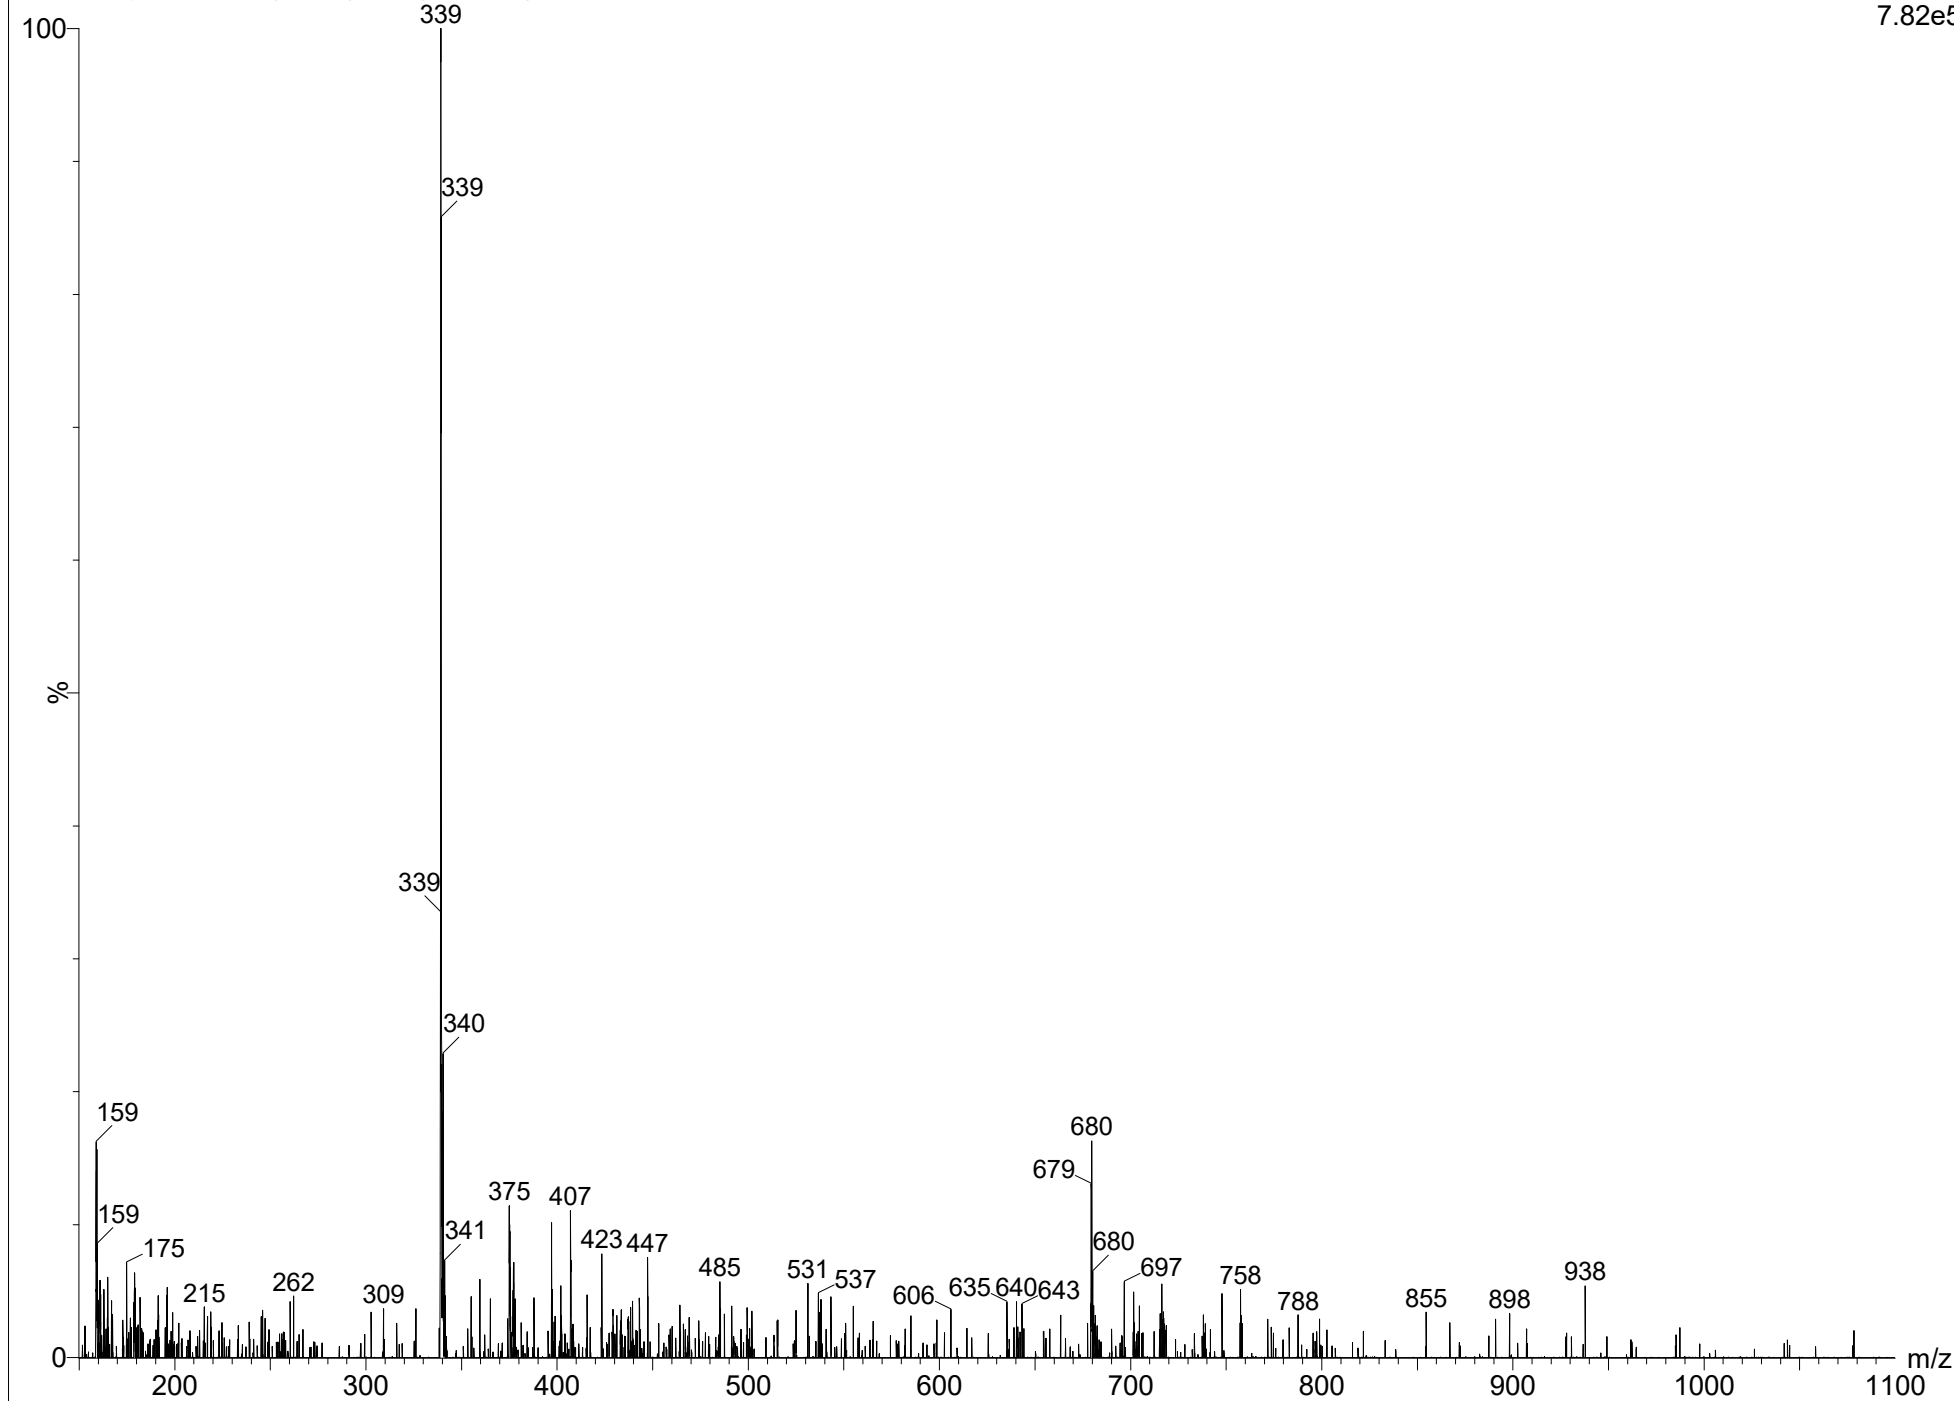

Supplement: s1 [file s1]

orzech\_pylek\_2 5102 (4.251)

2: Diode Array  
1.638e-1

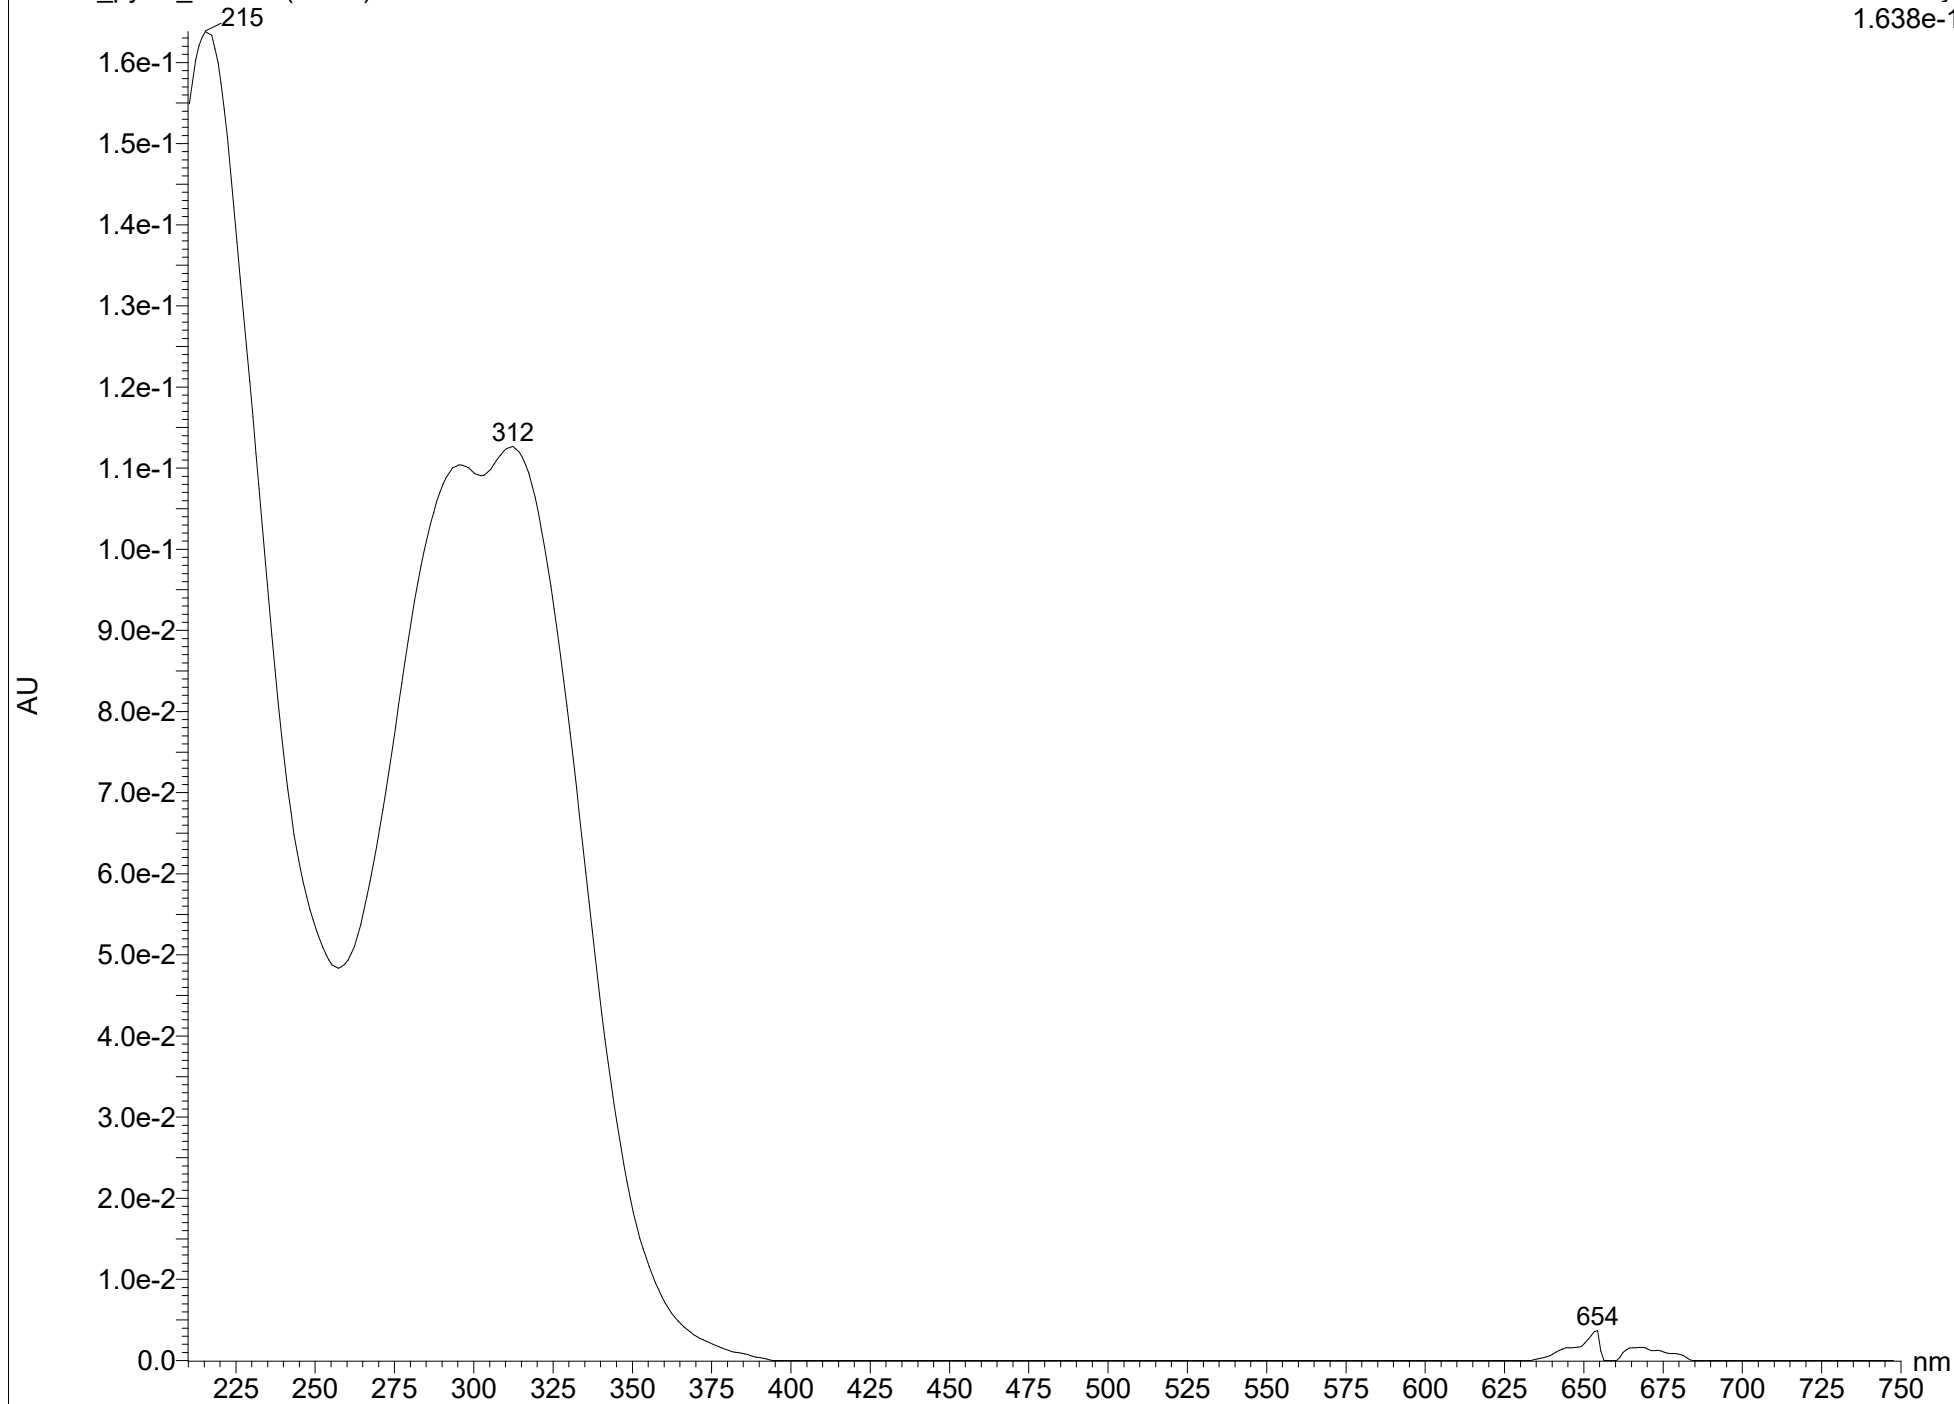

Supplement: s1 [file s1]

orzech\_pylek\_2 715 (6.092) Cm (710:716)

1: Scan ES-  
1.11e5

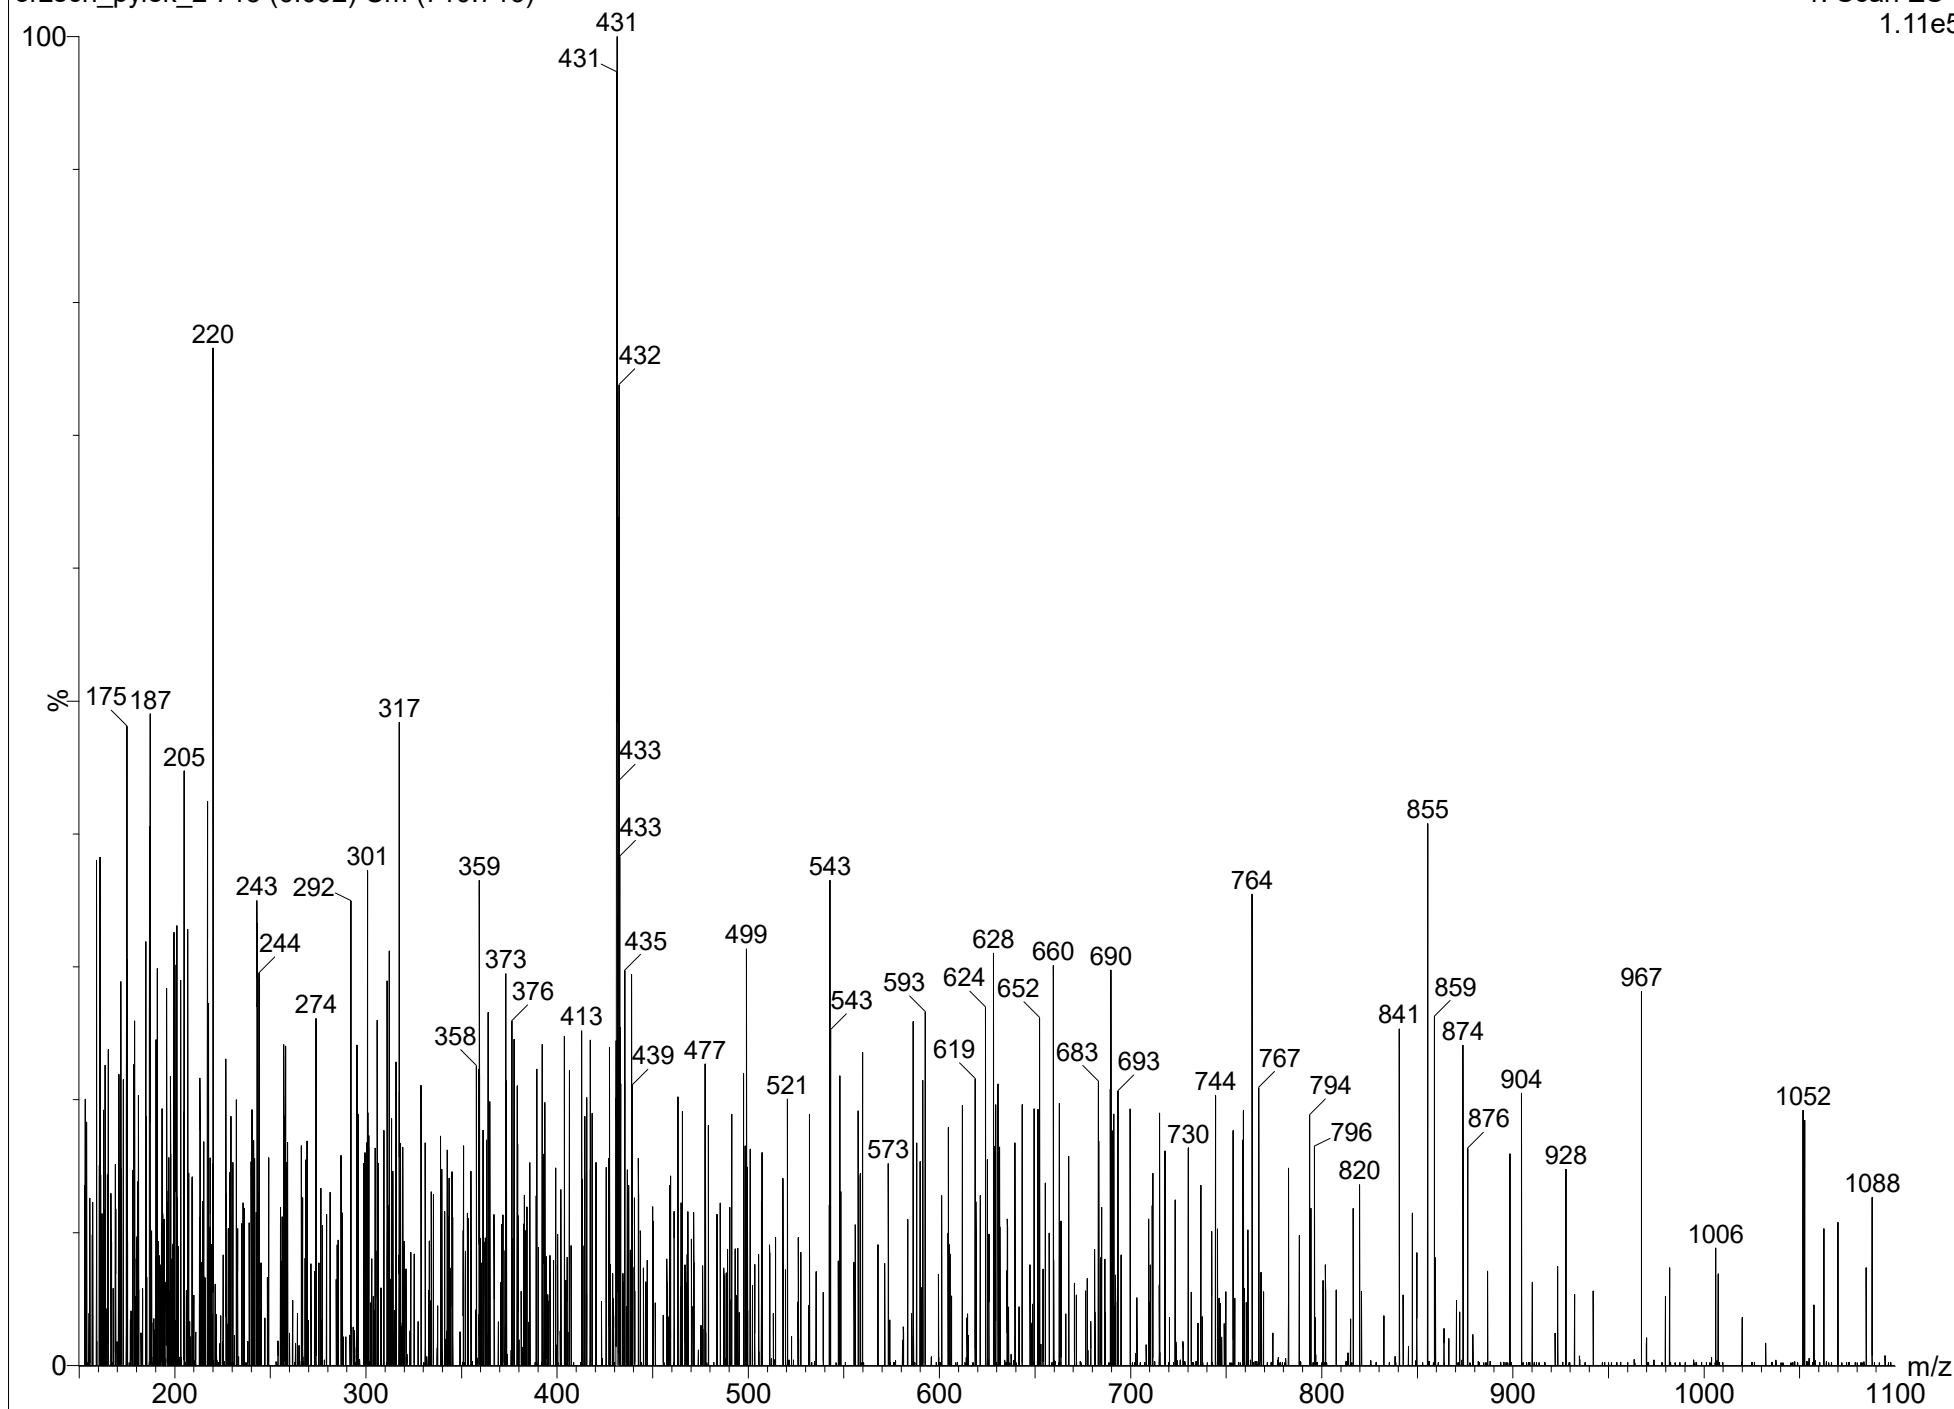

Supplement: s1 [file s1]

orzech\_pylek\_2 499 (4.251) Cm (497:503)

1: Scan ES-  
6.69e5

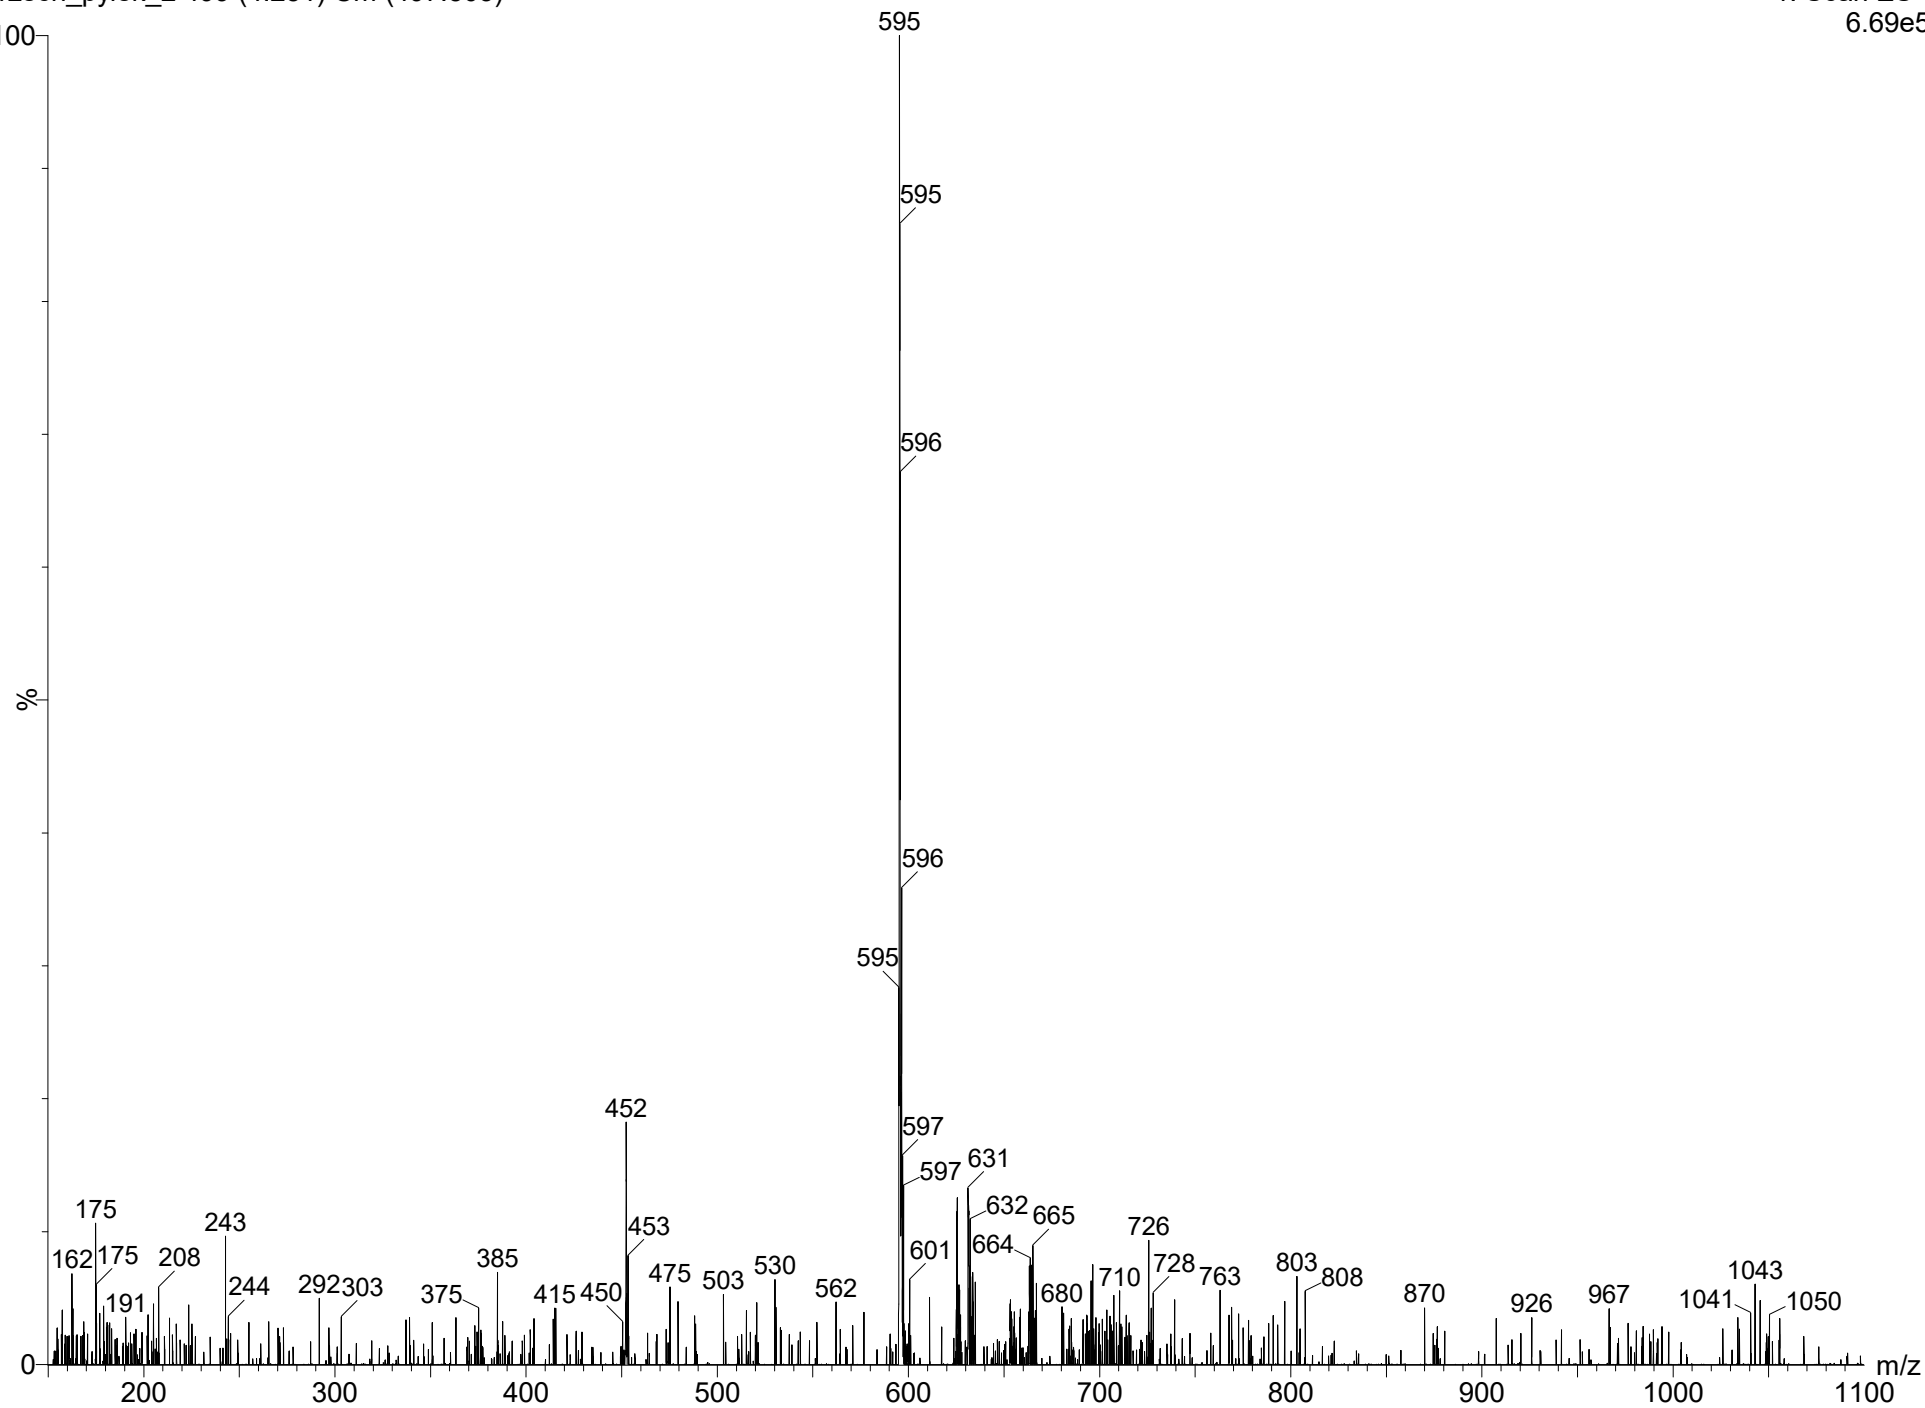

Supplement: s1 [file s1]

orzech\_pylek\_2 595 (5.069)

1: Scan ES-  
6.85e5

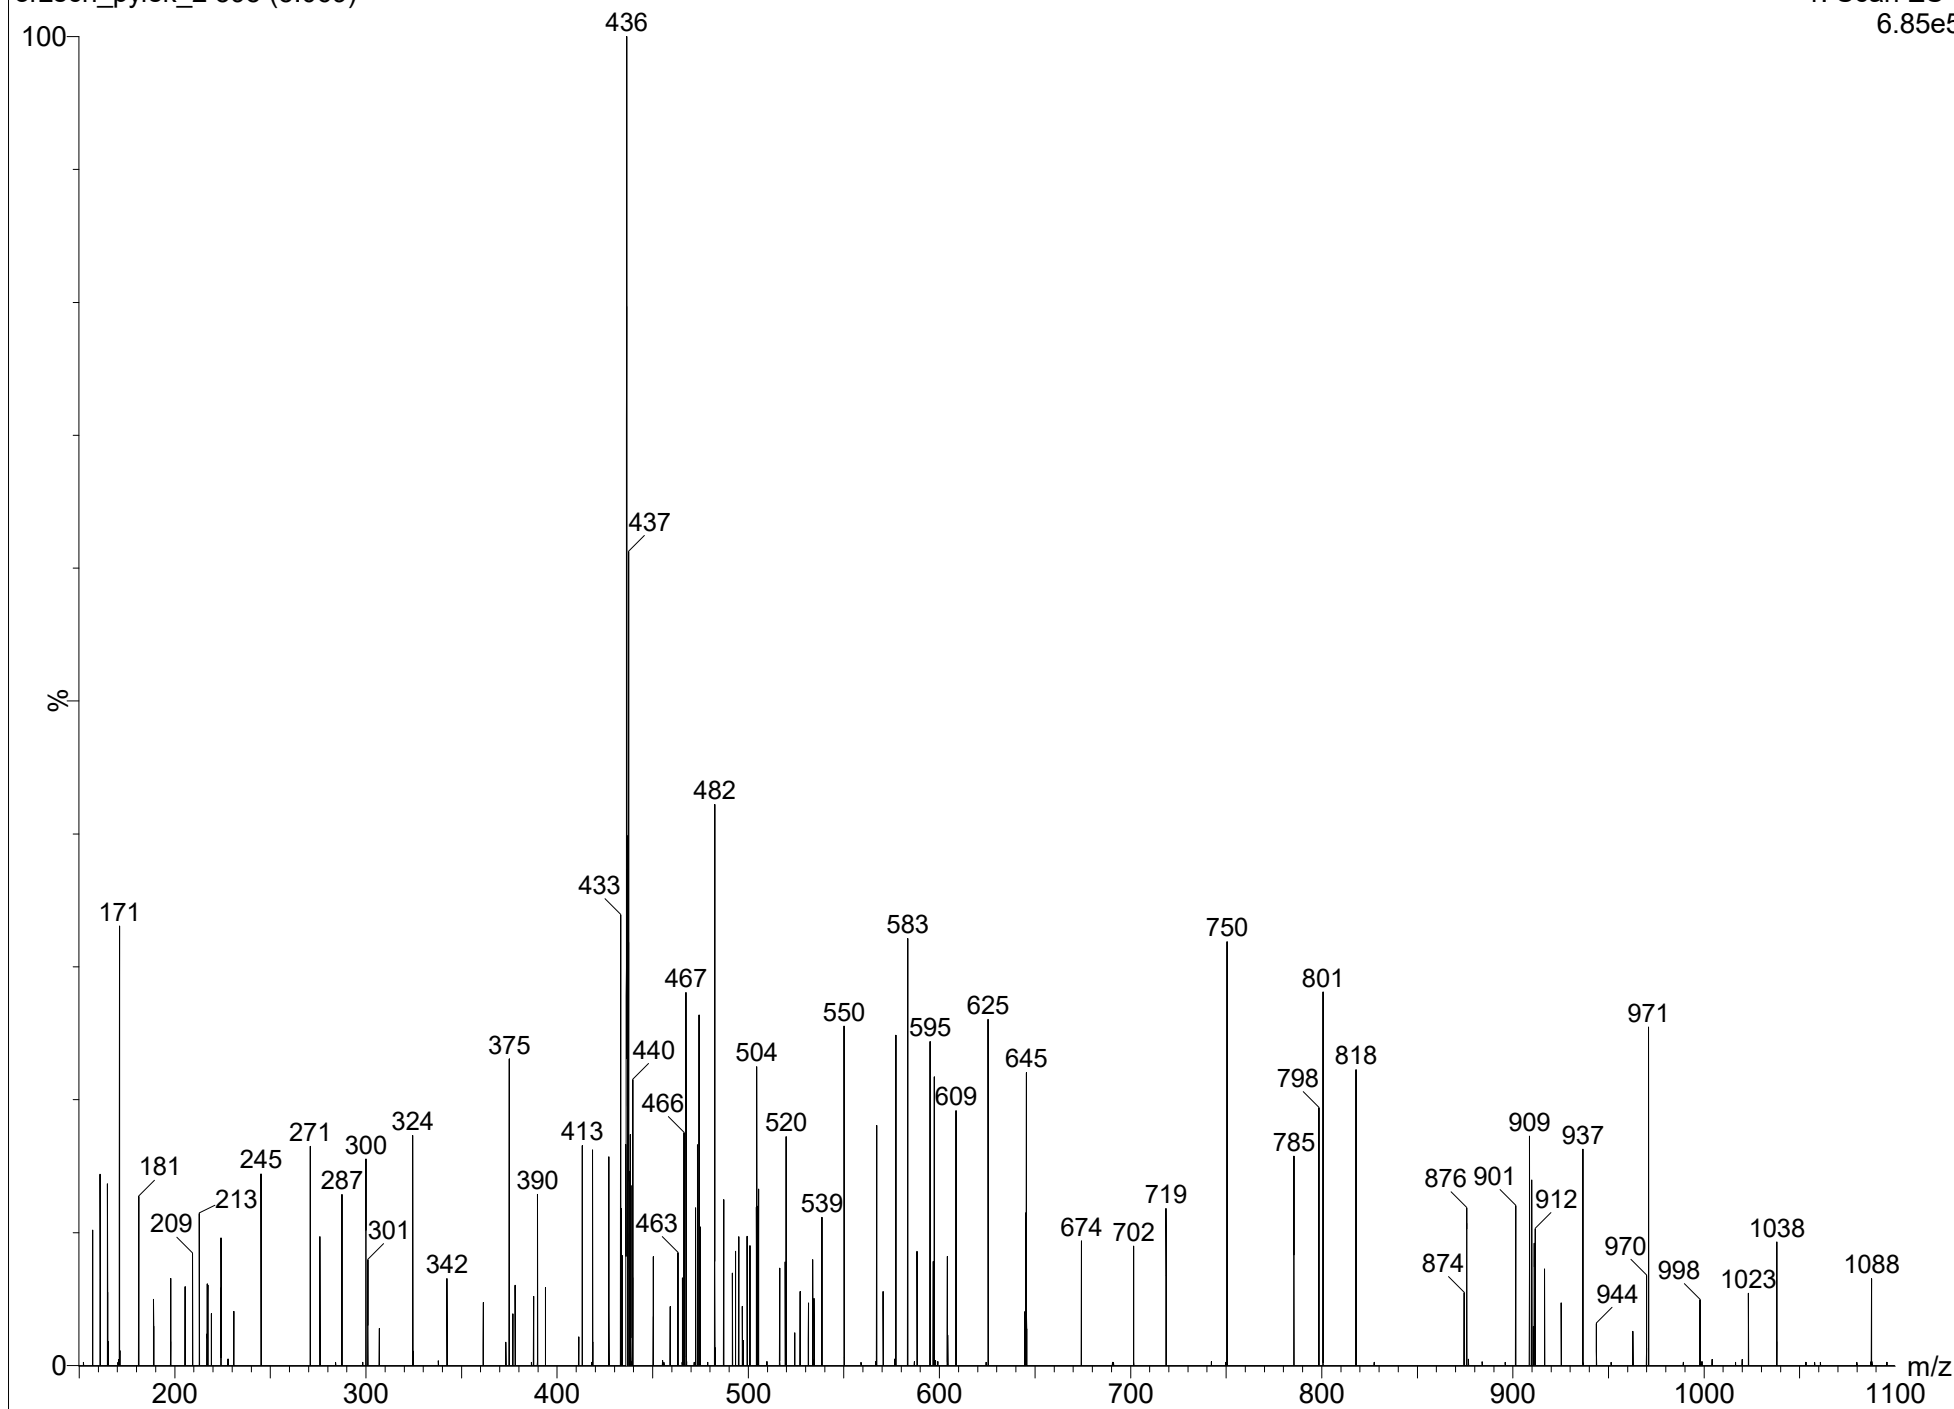

Supplement: s1 [file s1]

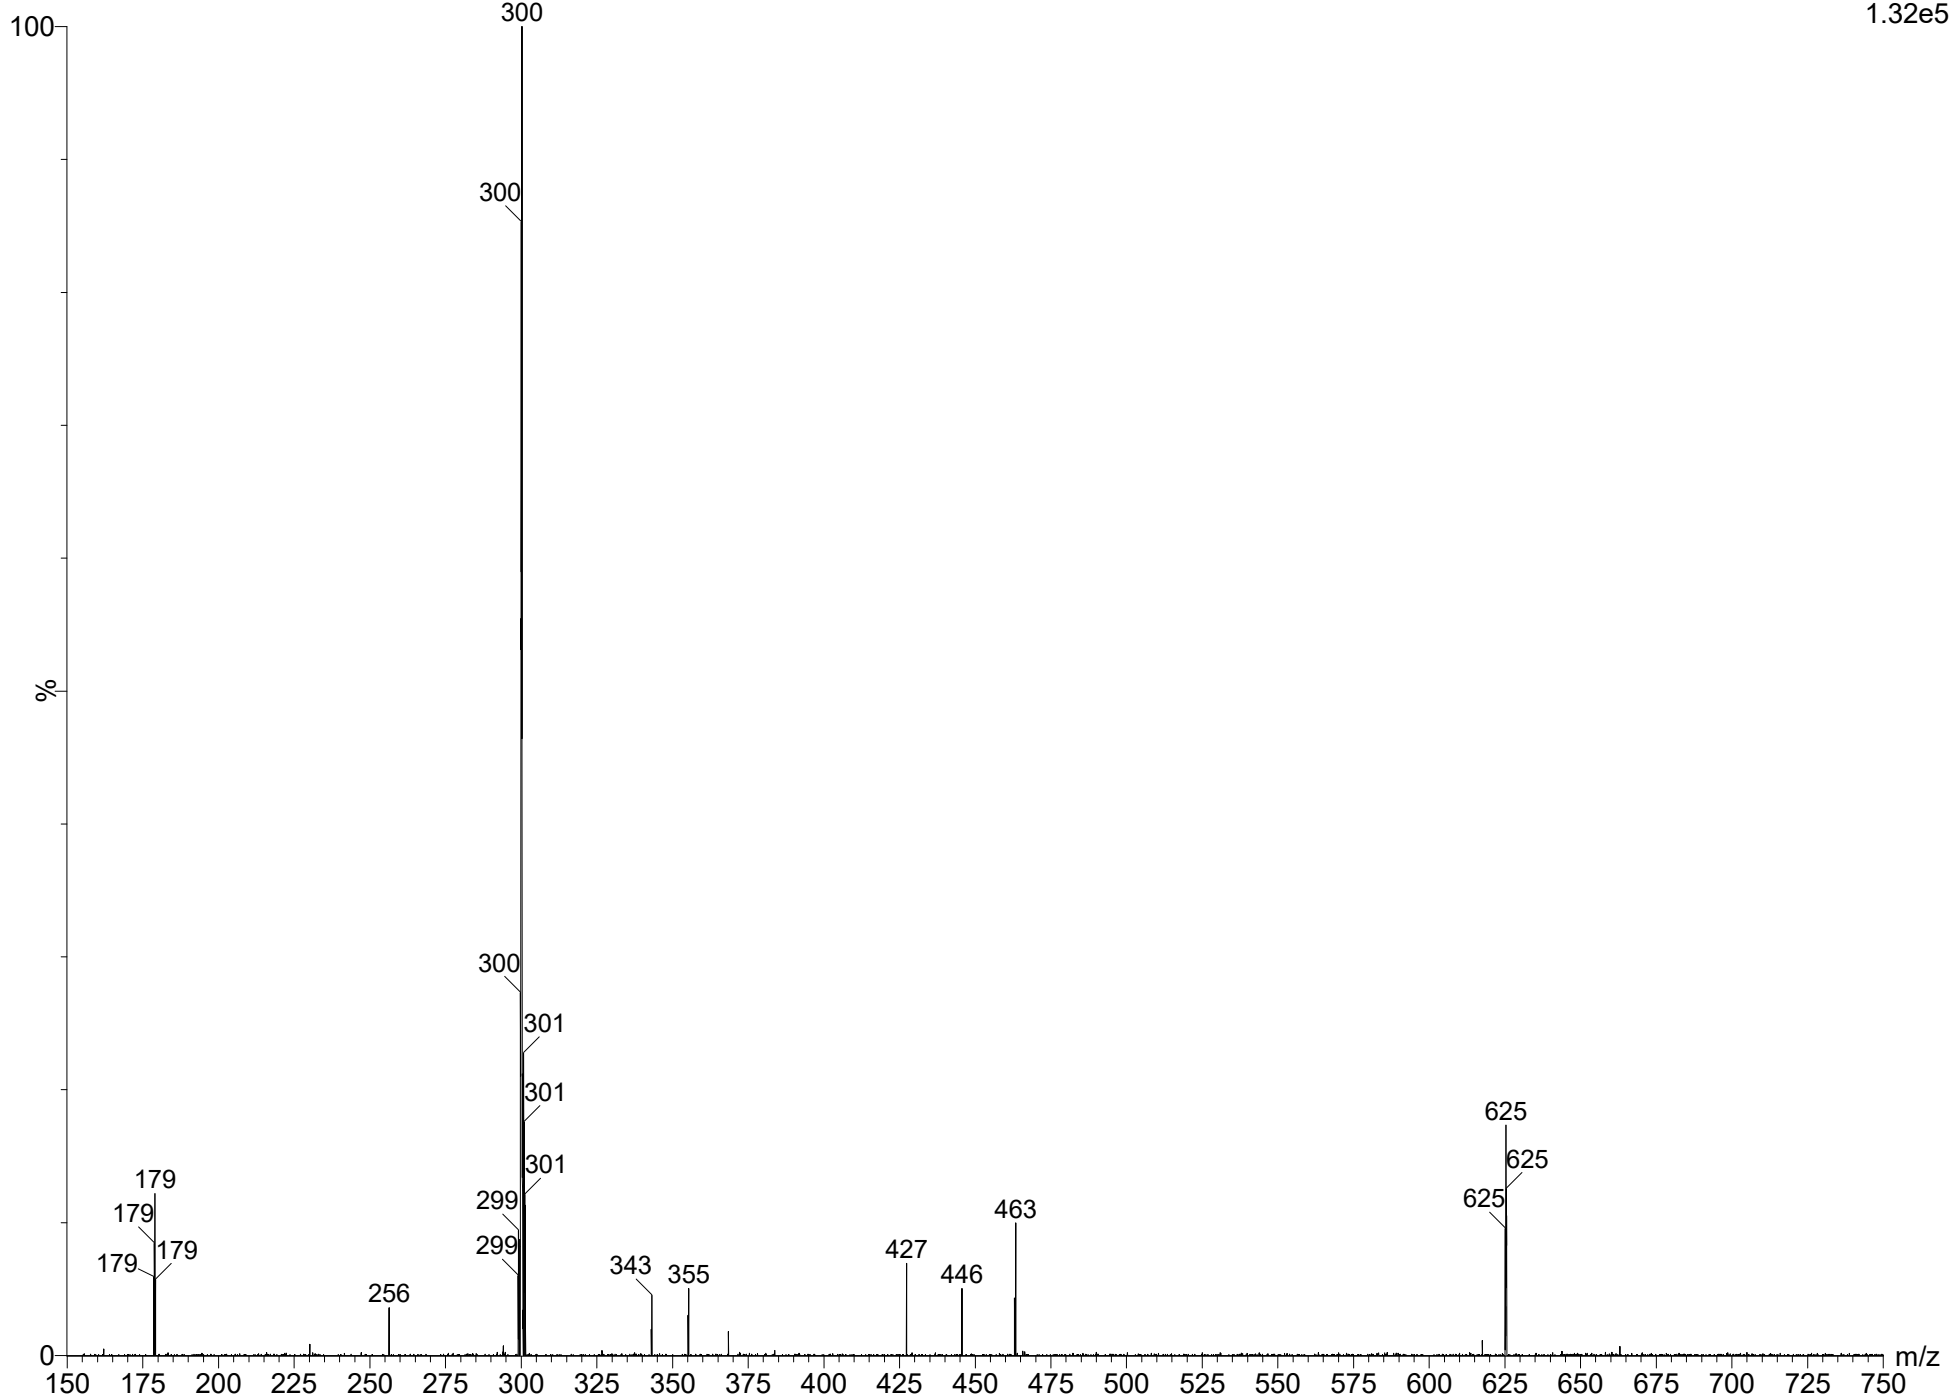

Supplement: s1 [file s1]
